# Supplementary material for: Can an external electric field switch between ethylene formation and l-arginine hydroxylation in the ethylene forming enzyme?
Source: Royal Society of Chemistry journal article supplement (doi:10.1039/d3cp01899g), 2023-01-01
Supplement: d3cp01899g1.pdf [file d3cp01899g1.pdf]

## Supporting Information

### Can an External Electric Field Switch between Ethylene Formation and L-Arginine Hydroxylation in the Ethylene Forming Enzyme?

Shobhit S. Chaturvedi, ‡<sup>a</sup> Simahudeen Bathir Jaber Sathik Rifayee, ‡<sup>a</sup> Rajeev Ramanan,<sup>b</sup> Joel A. Rankin,<sup>c</sup> Jian Hu,<sup>d,e</sup> Robert P. Hausinger,<sup>c,d</sup> Christo Z. Christov<sup>a,\*</sup>

<sup>a</sup> Department of Chemistry, Michigan Technological University, Houghton, MI 49931, USA.

<sup>b</sup> Department of Chemistry, National Institute of Technology, Rourkela, OR 769008, India.

<sup>c</sup> Department of Microbiology and Molecular Genetics, Michigan State University, East Lansing, MI 48824, USA.

<sup>d</sup> Department of Biochemistry and Molecular Biology, and <sup>e</sup> Department of Chemistry, Michigan State University, East Lansing, MI 48824, USA.

\*Corresponding Author: Christo Z. Christov: [christov@mtu.edu](mailto:christov@mtu.edu)

‡ Authors with equal contribution.

## Table of Contents

|                       |                                                                                                                                                                                                                                                                                  |     |
|-----------------------|----------------------------------------------------------------------------------------------------------------------------------------------------------------------------------------------------------------------------------------------------------------------------------|-----|
|                       | <b>Mutagenesis, protein purification, and assays for product formation</b>                                                                                                                                                                                                       | S3  |
|                       | <b>Two-Dimensional Reaction Coordinate Scan.</b>                                                                                                                                                                                                                                 | S5  |
|                       | <b>List of Figures</b>                                                                                                                                                                                                                                                           |     |
| <b>Figure S1.</b>     | Figure showing the orientation of the external electric field (ExtEF) is along the Fe-O <sub>2</sub> bond.                                                                                                                                                                       | S8  |
| <b>Figure S2.</b>     | The QM region used for the expanded QM region calculations with the <b>AO+0.0025</b> structure.                                                                                                                                                                                  | S9  |
| <b>Figure S3.</b>     | The change in the distance between the distal oxygen (O <sub>d</sub> ) of the superoxo complex and C2 of 2OG upon application of an ExtEF.                                                                                                                                       | S10 |
| <b>Figure S4.</b>     | Total energy decomposition analysis (EDA) for the residues stabilizing/de-stabilizing the <b>AO-IM</b> with respect to the <b>AO-RC</b> .                                                                                                                                        | S10 |
| <b>Figure S5.</b>     | Total EDA for the residues stabilizing/de-stabilizing the <b>BO-IM</b> with respect to the <b>BO-RC</b> .                                                                                                                                                                        | S11 |
| <b>Figure S6.</b>     | Total EDA for the residues stabilizing/de-stabilizing the <b>AO-IM+0.0025</b> with respect to the <b>AO-RC+0.0025</b> .                                                                                                                                                          | S11 |
| <b>Figure S7.</b>     | Total EDA for the residues stabilizing/de-stabilizing the <b>BO-IM-0.010</b> with respect to the <b>BO-RC-0.010</b> .                                                                                                                                                            | S12 |
| <b>Figure S8.</b>     | Potential Energy Surface profiles of EFE-AO systems                                                                                                                                                                                                                              | S12 |
| <b>Figure S9.</b>     | Potential Energy Surface profiles of EFE-BO systems                                                                                                                                                                                                                              | S13 |
| <b>Figure S10.</b>    | Potential Energy Surface profiles of EFE-AI systems                                                                                                                                                                                                                              | S13 |
| <b>Figure S11.</b>    | Potential Energy Surface profiles of EFE-BI systems                                                                                                                                                                                                                              | S14 |
| <b>Figure S12.</b>    | Potential Energy Surface obtained from 2D scans in the AI-0.010 system.                                                                                                                                                                                                          | S14 |
| <b>Figure S13.</b>    | Energy profile of the scan in the first dimension with the reaction coordinate O <sub>d</sub> -C <sub>2</sub> (2OG) distance for AI-0.010 ExtEF.                                                                                                                                 | S15 |
| <b>Figure S14.</b>    | Energy profiles of the scans in the second dimension with a reaction coordinate O <sub>p</sub> -O <sub>d</sub> distance starting from steps 2 to 12 from the first scan for AI-0.010 ExtEF                                                                                       | S15 |
| <b>Figure S15.</b>    | Energy profiles of the scans in the second dimension with a reaction coordinate O <sub>p</sub> -O <sub>d</sub> distance starting from steps 14 to 24 from the first scan for AI-0.010 ExtEF                                                                                      | S16 |
| <b>Figure S16.</b>    | Figure showing the stationary points on the PES obtained from 2D scan. a) Initial Fe(III)-superoxo with inline 2OG with L-Arg in A conformation, b) Fe(II)-succinyl peroxide, c) Ferryl, d) Partial bond Fe-O <sub>p</sub> intermediates, and e) Fe-O <sub>p</sub> bond breakage | S16 |
| <b>List of Tables</b> |                                                                                                                                                                                                                                                                                  |     |

|                                                                                               |                                                                                                                                                                                                       |         |
|-----------------------------------------------------------------------------------------------|-------------------------------------------------------------------------------------------------------------------------------------------------------------------------------------------------------|---------|
| <b>Table S1</b>                                                                               | Peroxisuccinate intermediate (IM) exothermicity from the TS state during O <sub>2</sub> activation, as reported in the literature.                                                                    | S6      |
| <b>Table S2-S16.</b>                                                                          | Spin densities and Mulliken charges of stationary points in the O <sub>2</sub> attack on 2OG for conformation A of L-Arg and off-line 2OG bound to EFE with varying ExtEF values along the Fe-O bond. | S17-S21 |
| <b>Table S17-S33.</b>                                                                         | Spin densities and Mulliken charges of stationary points in the O <sub>2</sub> attack on 2OG for conformation B of L-Arg and off-line 2OG bound to EFE with varying ExtEF values along the Fe-O bond. | S21-S25 |
| <b>Table S34-S41.</b>                                                                         | Spin densities and Mulliken charges of stationary points in the O <sub>2</sub> attack on 2OG for conformation A of L-Arg and in-line 2OG bound to EFE with varying ExtEF values along the Fe-O bond.  | S25-S27 |
| <b>Table S42-S49.</b>                                                                         | Spin densities and Mulliken charges of stationary points in the O <sub>2</sub> attack on 2OG for conformation B of L-Arg and in-line 2OG bound to EFE with varying ExtEF values along the Fe-O bond.  | S27-S29 |
| <b>Table S50.</b>                                                                             | The occupation numbers of the Fe-O bonding natural orbitals in off-line 2OG with L-Arg conformation A and B under varying ExtEF conditions.                                                           | S29     |
| <b>Table S51.</b>                                                                             | Ethylene and P5C production by selected EFE variants described in the text compared to the WT enzyme.                                                                                                 | S30     |
| <b>Cartesian coordinates of the QM/MM optimized QM region geometries of stationary points</b> |                                                                                                                                                                                                       | S31-S78 |

### Mutagenesis, protein purification, and assays for product formation

The E84A, R171A, R184A, and E285A variants of EFE were previously characterized and the R277A protein was shown to form insoluble inclusions in the cells.<sup>1</sup> Three new variants (D91A, D253A, and K269A) were created by site-directed mutagenesis using a gap-repair method<sup>2</sup> with the template pET28a:His6-TEV-EFE<sup>3</sup> and the following primers: CGCTGGGAAACCCGCCTTTCCCGAAATTTTTACCGTGTGTAAAG, D91A-F; GGGTTTCC-AGCGGTA ACTTC, D91A-R; ACCGTTTTTCCCGGAGCTATTCTGCAATTTATGACCGGGGGAC, D253A-F; TCCGGGAAAAACGGTCCAC, D253A-R; CTGTCCACTCCCCATGCAGTGAAATTGAATACCCGTGAACGG, K269A-F; and ATGGGGAGTGGACAGTAACTG, K269A-R. The DpnI-digested products were transformed into *Escherichia coli* DH5 $\alpha$ .

The new EFE variants were expressed as previously described.<sup>1</sup> Cells were suspended in buffer A [50 mM NaH<sub>2</sub>PO<sub>4</sub>, 100 mM NaCl, 10 mM imidazole titrated to a pH of 7.5 with sodium hydroxide] supplemented with 1 mM phenylmethylsulfonyl fluoride and 1 U/mL Benzonase (EMD Millipore). Cells were lysed using two passes through a French pressure cell at 16,000 psi and clarified by ultracentrifugation at 146,000 rcf for 45 min at 4 °C. Nickel-nitrilotriacetic acid (Ni-NTA) resin was equilibrated in buffer A and the clarified lysate was applied to the resin by gravity flow. The column was washed with five column volumes of buffer A and the sample was eluted with three column volumes of buffer A containing 250 mM imidazole titrated with HCl to pH 7.5. Tobacco etch virus protease<sup>4</sup> and 5 mM ethylenediaminetetraacetic acid were added and digestion was continued overnight at 4 °C. The sample was exchanged into Buffer A using a PD-10 column (Cytiva), TEV and uncleaved EFE were removed using a Ni-NTA column equilibrated in buffer A, and the flow through fraction was collected by gravity flow. The preparation was concentrated using an Amicon Ultra-4 10 kDa cutoff spin filter (MilliporeSigma) and exchanged using a PD-10 column into 25 mM 4-(2-hydroxyethyl)-1-piperazineethanesulfonic acid (HEPES) buffer adjusted to pH 8.0 with sodium hydroxide.

EFE (1 μM final concentration) was assayed in 2 mL of 25 mM HEPES titrated to pH 7.5 with sodium hydroxide, 0.5 mM 2OG, 0.5 mM L-Arg, 0.2 mM ammonium ferrous sulfate and 0.4 mM sodium L-ascorbate. After 80 min, the reactions were terminated with 100 μL of 3.6 M hydrochloric acid. The amounts of ethylene and P5C were determined as previously reported.<sup>3</sup>

## Two-Dimensional Reaction Coordinate Scan.

We are particularly grateful to the reviewer for this very relevant and important point. We performed 2D PES calculations as the reviewer suggested. The calculated overall 2D PES is shown in **Figure S12**. We used an initial structure of **AI** (L-Arg in conformation A, in-line 2OG) complex, which leads to the ferryl intermediate's formation on applying -0.010 ExtEF (**Figure 2** in the manuscript and **Figure S16**). The reaction coordinate for the PES calculations in the first dimension was the decrease of the distance between  $O_d$  and  $C_2$  of 2OG. During the scan, the bond between Fe and  $O_p$  breaks during step 13 (**Figure S13 and S16e**), and is created again at step 21, where Fe(II)-succinyl-peroxide intermediate is formed (**Figure S13 and S16b**). At step 23 from the scan, the ferryl is finally formed (**Figures S12, S16c**).

As the initial structure for the scans in the second dimension, the structure from each other step from the scan from the first dimension was taken. The reaction coordinate for the scans in the second dimension increased the  $O_p$ - $O_d$  distance without restraining the  $O_d$ - $C_2$  bond (the reaction coordinate in the first dimension). In all second-dimension scans that started from structures up to 12 (from the first-dimension scan), the reaction proceeds through a very high barrier of 65-70 kcal/mol, breaking the high-energy  $O_p$ - $O_d$  bond but not leading to the expected products (**Figures S12 and S14**). The second-dimension scans starting from steps 14 through 20 lead to very exothermic Fe(II)-succinyl-peroxide (with about -75 kcal/mol change in energy from the TS) (**Figure S15 and S16b**). The second-dimension scan starting from point 24 (from the first scan) forms the ferryl intermediate at the beginning (**Figures S15 and S16c**).

The high exothermicity of the Fe(II)-succinyl-peroxide intermediate in the 2D scans is consistent with the scans performed with the combined coordinate in the present manuscript and our prior

study,<sup>5</sup> with another computational study of the EFE,<sup>6</sup> and with studies of many different Fe(II)/2OG enzymes.<sup>7–12</sup>

Nonetheless, the fact that 2D PES show high energy jumps during the reaction path suggests that more complex conformational changes in the active site might contribute to the reaction. Such effects can be explored, for example, using QM/MM Meta dynamics simulations of the free energy surface of the reaction path<sup>13–17</sup>, which could be a subject of future study. However, we should be cautious that the QM/MM MetD simulations are much more computationally demanding; they do not provide well-defined energy minima and transition state structures, which in this study are vital.

**Table S1.** Peroxosuccinate intermediate (IM) exothermicity from the TS state during O<sub>2</sub> activation, as reported in the literature.

| <b>Publication by Other Groups</b>                                                                                                                                               | <b>Energy jump from TS to IM<br/>(peroxosuccinate)</b> |
|----------------------------------------------------------------------------------------------------------------------------------------------------------------------------------|--------------------------------------------------------|
| Xue, J.; Lu, J.; Lai, W., <i>Phys Chem Chem Phys</i> 2019, 21 (19), 9957–9968.                                                                                                   | 34.7                                                   |
| Rugg, G.; Senn, H. M., <i>Phys Chem Chem Phys</i> 2017, 19 (44), 30107–30119.                                                                                                    | 62.6                                                   |
| Song, X.; Lu, J.; Lai, W., <i>Phys Chem Chem Phys</i> 2017, 19 (30), 20188–20197.                                                                                                | 58.9                                                   |
| Wójcik, A.; Radoń, M.; Borowski, T., <i>J. Phys. Chem. A</i> 2016, 120 (8), 1261–1274.                                                                                           | 57.2                                                   |
| <b>Our earlier Publications</b>                                                                                                                                                  |                                                        |
| Waheed, S. O.; Ramanan, R.; Chaturvedi, S. S.; Lehnert, N.; Schofield, C. J.;<br>Christov, C. Z.; Karabancheva-Christova, T. G., <i>ACS Cent. Sci.</i> 2020, 6 (5), 795–<br>814. | 46.1                                                   |
| S. Chaturvedi, S.; Ramanan, R.; Hu, J.; P. Hausinger, R.; Z. Christov, C., <i>ACS Catal.</i><br>2021, 11 (3), 1578–1592.                                                         | AO-35.8<br>BO-37.9                                     |
| S. Chaturvedi, S.; Ramanan, R.; Lehnert, N.; J. Schofield, C.; G. Karabancheva-                                                                                                  | 49.7                                                   |

|                                                                     |          |
|---------------------------------------------------------------------|----------|
| Christova, T.; Z. Christov, C., ACS Catal. 2019, 10 (2), 1195–1209. |          |
| <b>Current Manuscript</b>                                           | 40 to 45 |

## References

- (1) Martinez, S.; Fellner, M.; Herr, C. Q.; Ritchie, A.; Hu, J.; Hausinger, R. P. Structures and Mechanisms of the Non-Heme Fe(II)- and 2-Oxoglutarate-Dependent Ethylene-Forming Enzyme: Substrate Binding Creates a Twist. *J. Am. Chem. Soc.* **2017**, *139* (34), 11980–11988. <https://doi.org/10.1021/jacs.7b06186>.
- (2) García-Nafría, J.; Watson, J. F.; Greger, I. H. IVA Cloning: A Single-Tube Universal Cloning System Exploiting Bacterial In Vivo Assembly. *Sci. Rep.* **2016**, *6* (1), 27459. <https://doi.org/10.1038/srep27459>.
- (3) Martinez, S.; Hausinger, R. P. Biochemical and Spectroscopic Characterization of the Non-Heme Fe(II)- and 2-Oxoglutarate-Dependent Ethylene-Forming Enzyme from *Pseudomonas Syringae* Pv. Phaseolicola PK2. *Biochemistry* **2016**, *55* (43), 5989–5999. <https://doi.org/10.1021/acs.biochem.6b00890>.
- (4) Blommel, P. G.; Fox, B. G. A Combined Approach to Improving Large-Scale Production of Tobacco Etch Virus Protease. *Protein Expr. Purif.* **2007**, *55* (1), 53–68. <https://doi.org/10.1016/j.pep.2007.04.013>.
- (5) S. Chaturvedi, S.; Ramanan, R.; Hu, J.; P. Hausinger, R.; Z. Christov, C. Atomic and Electronic Structure Determinants Distinguish between Ethylene Formation and L-Arginine Hydroxylation Reaction Mechanisms in the Ethylene-Forming Enzyme. *ACS Catal.* **2021**, *11* (3), 1578–1592. <https://doi.org/10.1021/acscatal.0c03349>.
- (6) Xue, J.; Lu, J.; Lai, W. Mechanistic Insights into a Non-Heme 2-Oxoglutarate-Dependent Ethylene-Forming Enzyme: Selectivity of Ethylene-Formation versus l -Arg Hydroxylation. *Phys Chem Chem Phys* **2019**, *21* (19), 9957–9968.
- (7) Rugg, G.; Senn, H. M. Formation and Structure of the Ferryl [Fe=O] Intermediate in the Non-Haem Iron Halogenase SyrB2: Classical and QM/MM Modelling Agree. *Phys Chem Chem Phys* **2017**, *19* (44), 30107–30119.
- (8) Song, X.; Lu, J.; Lai, W. Mechanistic Insights into Dioxygen Activation, Oxygen Atom Exchange and Substrate Epoxidation by AsqJ Dioxygenase from Quantum Mechanical/Molecular Mechanical Calculations. *Phys Chem Chem Phys* **2017**, *19* (30), 20188–20197.
- (9) O. Waheed, S.; S. Chaturvedi, S.; G. Karabencheva-Christova, T.; Z. Christov, C. Catalytic Mechanism of Human Ten-Eleven Translocation-2 (TET2) Enzyme: Effects of Conformational Changes, Electric Field, and Mutations. *ACS Catal.* **2021**, *11* (7), 3877–3890. <https://doi.org/10.1021/acscatal.0c05034>.
- (10) Waheed, S. O.; Ramanan, R.; Chaturvedi, S. S.; Lehnert, N.; Schofield, C. J.; Christov, C. Z.; Karabencheva-Christova, T. G. Role of Structural Dynamics in Selectivity and Mechanism of Non-Heme Fe(II) and 2-Oxoglutarate-Dependent Oxygenases Involved in DNA Repair. *ACS Cent. Sci.* **2020**, *6* (5), 795–814. <https://doi.org/10.1021/acscentsci.0c00312>.

- (11) S. Chaturvedi, S.; Ramanan, R.; Lehnert, N.; J. Schofield, C.; G. Karabencheva-Christova, T.; Z. Christov, C. Catalysis by the Non-Heme Iron(II) Histone Demethylase PHF8 Involves Iron Center Rearrangement and Conformational Modulation of Substrate Orientation. *ACS Catal.* **2019**, *10* (2), 1195–1209. <https://doi.org/10.1021/acscatal.9b04907>.
- (12) Wójcik, A.; Radoń, M.; Borowski, T. Mechanism of O<sub>2</sub> Activation by  $\alpha$ -Ketoglutarate Dependent Oxygenases Revisited. A Quantum Chemical Study. *J. Phys. Chem. A* **2016**, *120* (8), 1261–1274. <https://doi.org/10.1021/acs.jpca.5b12311>.
- (13) Sun, R.; Sode, O.; Dama, J. F.; Voth, G. A. Simulating Protein Mediated Hydrolysis of ATP and Other Nucleoside Triphosphates by Combining QM/MM Molecular Dynamics with Advances in Metadynamics. *J. Chem. Theory Comput.* **2017**, *13* (5), 2332–2341. <https://doi.org/10.1021/acs.jctc.7b00077>.
- (14) Bussi, G.; Laio, A. Using Metadynamics to Explore Complex Free-Energy Landscapes. *Nat. Rev. Phys.* **2020**, *2* (4), 200–212. <https://doi.org/10.1038/s42254-020-0153-0>.
- (15) Waheed, S. O.; Varghese, A.; DiCasteri, I.; Kaski, B.; LaRouche, C.; Fields, G. B.; Karabencheva-Christova, T. G. Mechanism of the Early Catalytic Events in the Collagenolysis by Matrix Metalloproteinase-1. *ChemPhysChem* *n/a* (n/a), e202200649. <https://doi.org/10.1002/cphc.202200649>.
- (16) Wang, B.; Cao, Z.; Rovira, C.; Song, J.; Shaik, S. Fenton-Derived OH Radicals Enable the MPnS Enzyme to Convert 2-Hydroxyethylphosphonate to Methylphosphonate: Insights from Ab Initio QM/MM MD Simulations. *J. Am. Chem. Soc.* **2019**, *141* (23), 9284–9291. <https://doi.org/10.1021/jacs.9b02659>.
- (17) Vidossich, P.; Fiorin, G.; Alfonso-Prieto, M.; Derat, E.; Shaik, S.; Rovira, C. On the Role of Water in Peroxidase Catalysis: A Theoretical Investigation of HRP Compound I Formation. *J. Phys. Chem. B* **2010**, *114* (15), 5161–5169. <https://doi.org/10.1021/jp911170b>.

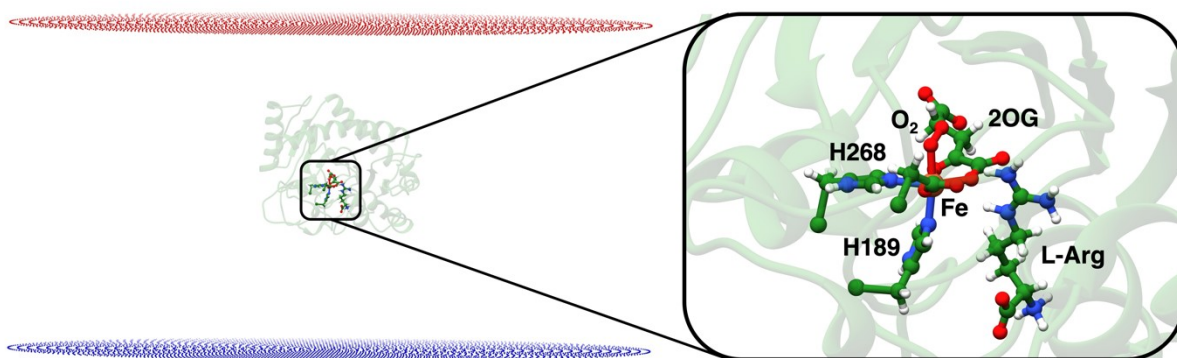

**Figure S1.** Figure showing the orientation of the external electric field (ExtEF) is along the Fe-O<sub>2</sub> bond.



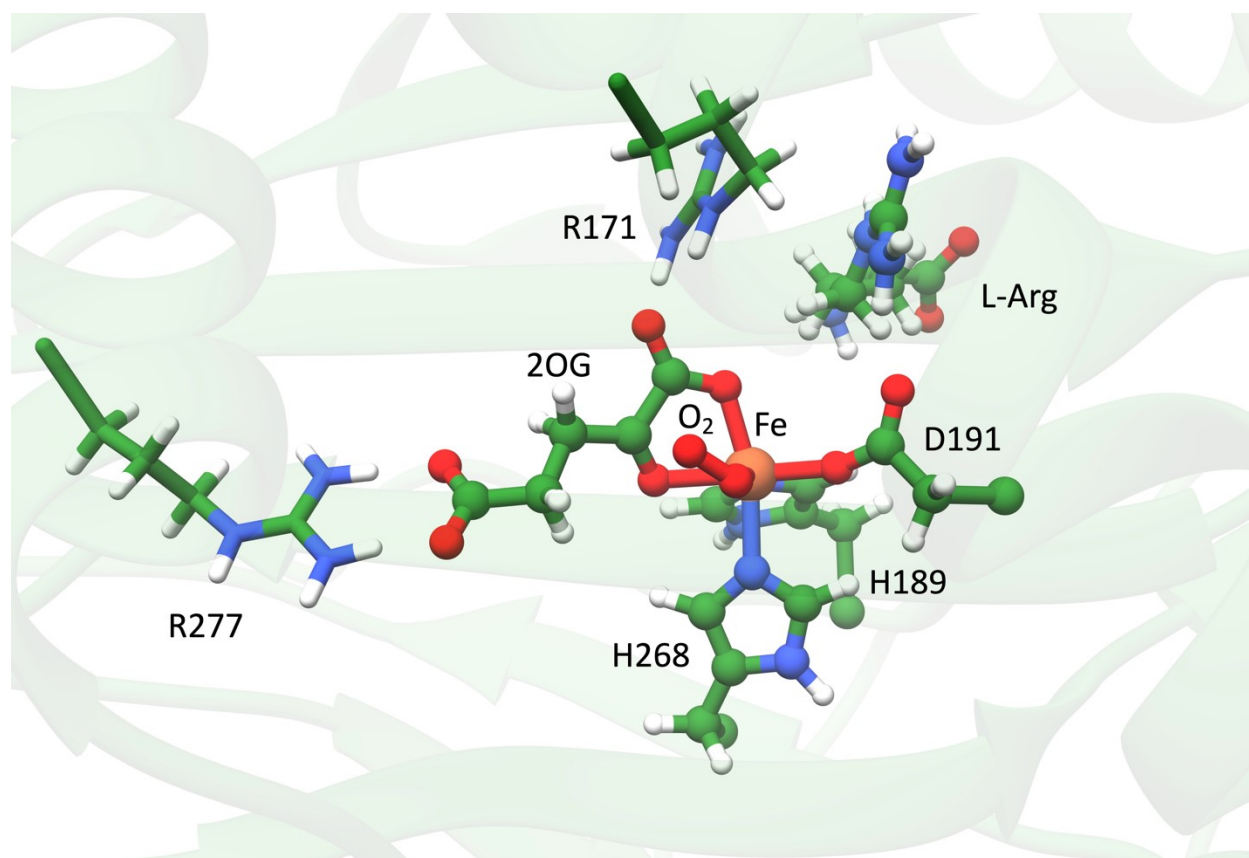

**Figure S2.** The QM region used for the expanded QM region calculations with the **AO+0.0025** structure. The new added salt-bridge forming residues with 2OG - R277 and R171 are shown in sticks.

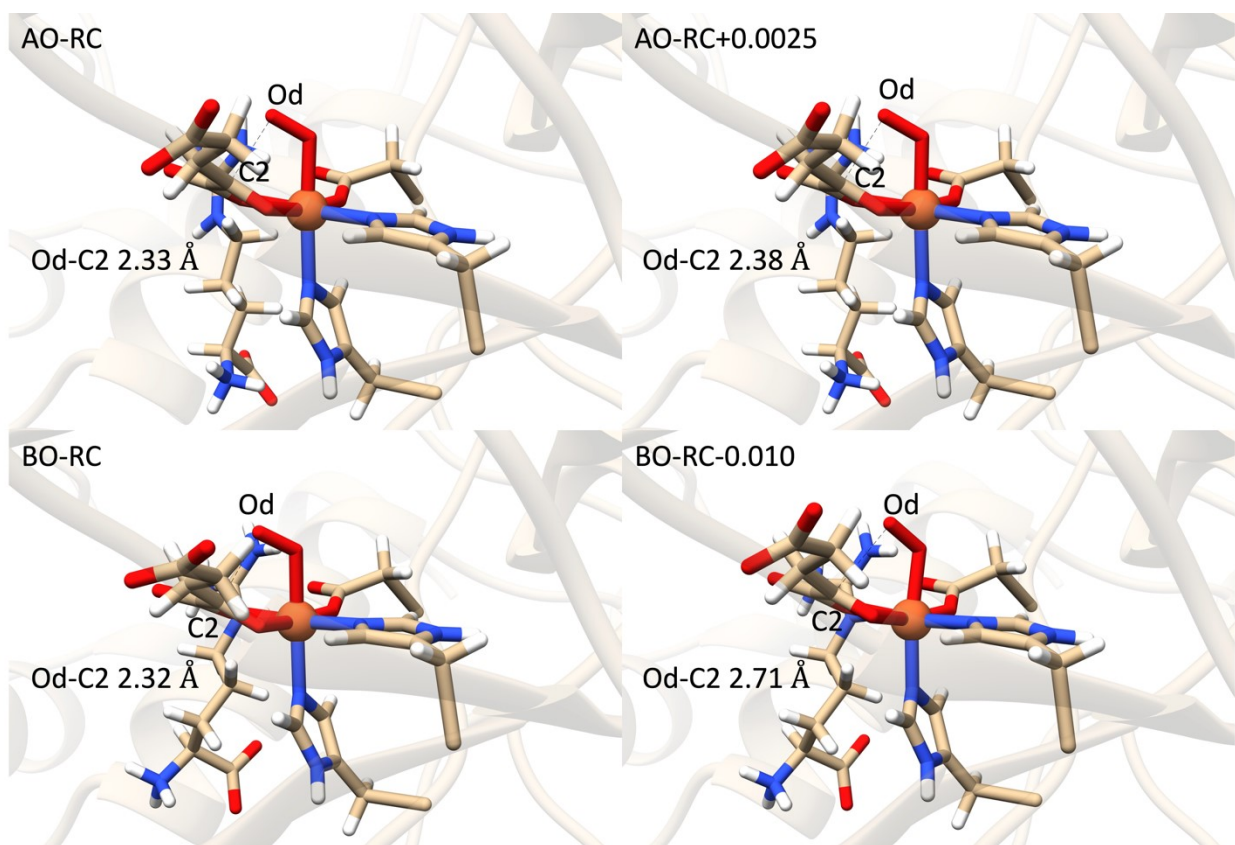

**Figure S3.** The change in the distance between the distal oxygen (Od) of the superoxo complex and C2 of 2OG upon application of an ExtEF.

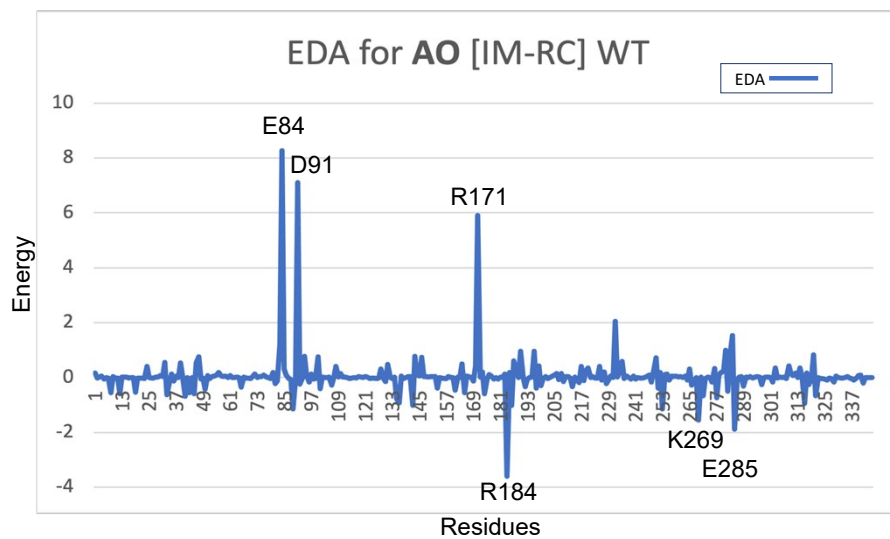

**Figure S4.** Total energy decomposition analysis (EDA) for the residues stabilizing/de-stabilizing the AO-IM with respect to the AO-RC.

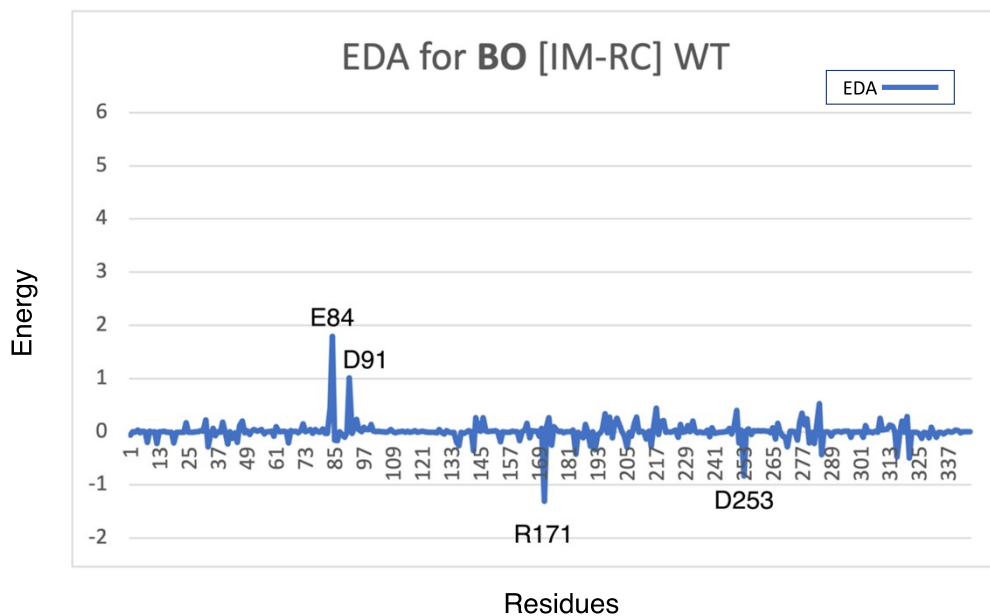

**Figure S5.** Total EDA for the residues stabilizing/de-stabilizing the **BO-IM** with respect to the **BO-RC**.

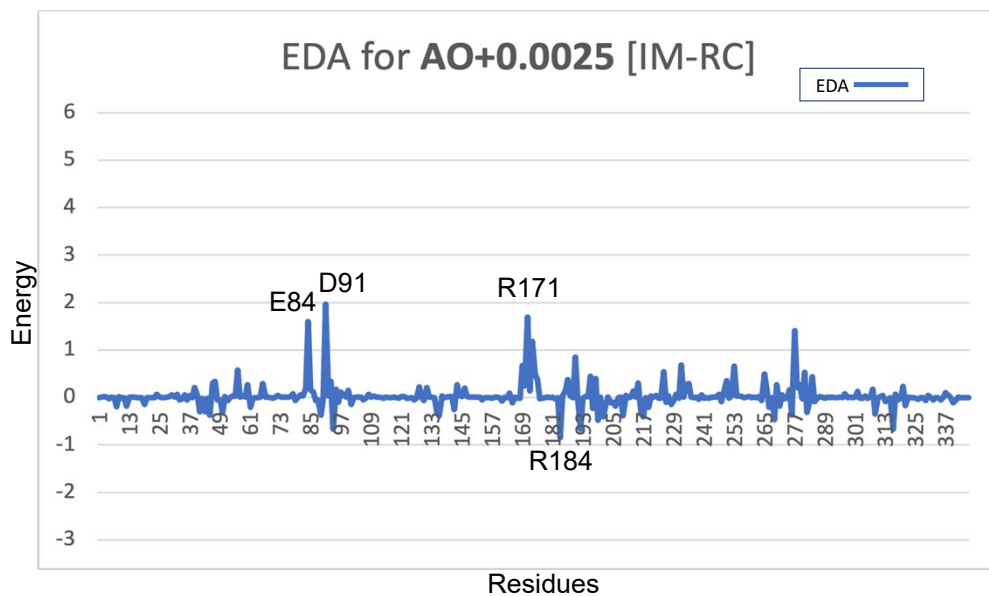

**Figure S6.** Total EDA for the residues stabilizing/de-stabilizing the **AO-IM+0.0025** with respect to the **AO-RC+0.0025**.

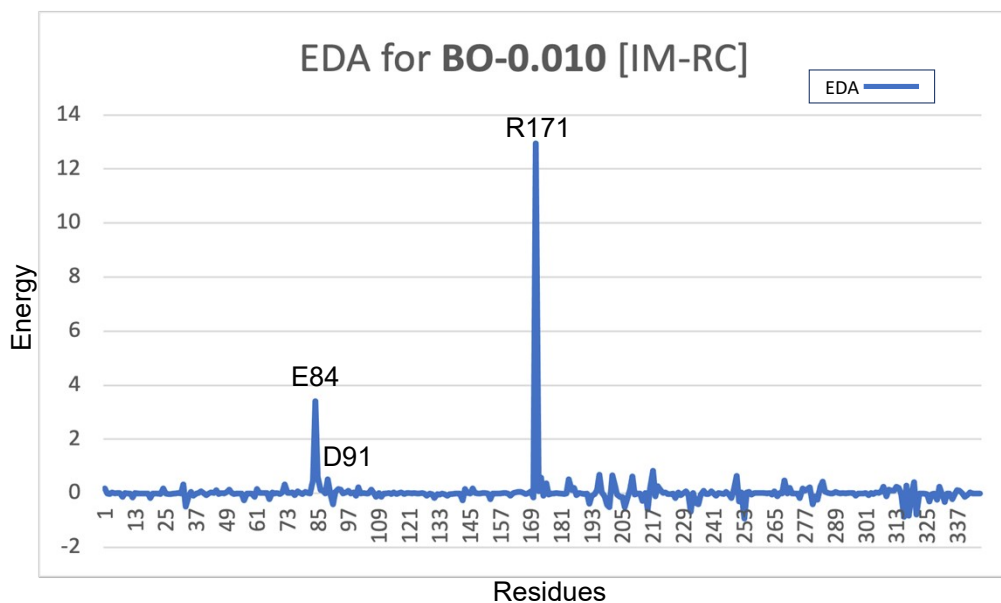

**Figure S7.** Total EDA for the residues stabilizing/de-stabilizing the **BO-IM-0.010** with respect to the **BO-RC-0.010**.

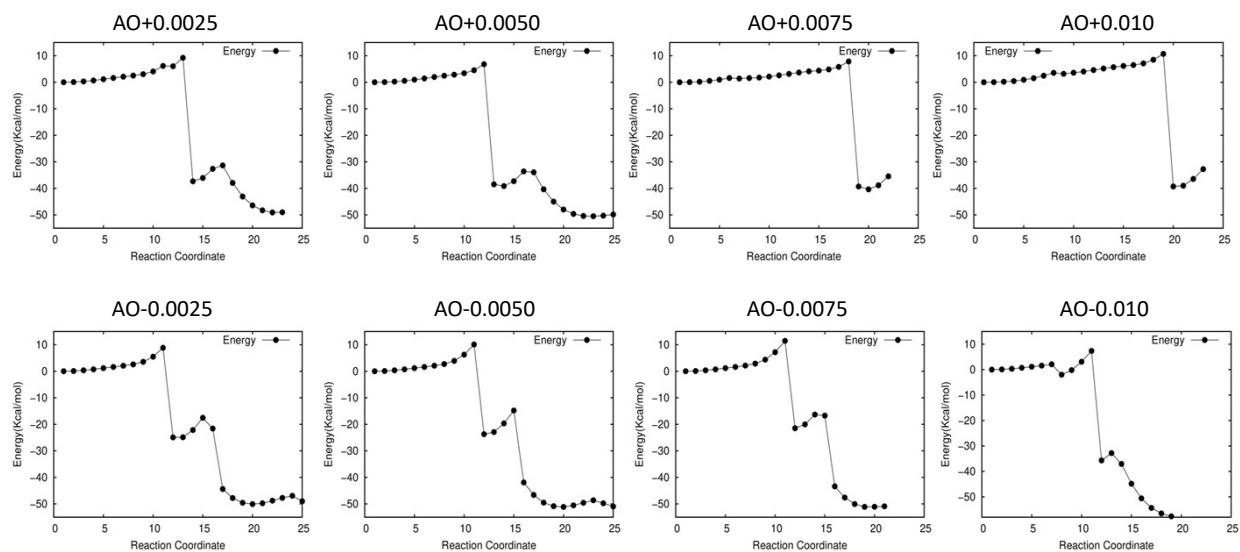

**Figure S8.** Potential Energy Surface profiles of EFE-AO systems.

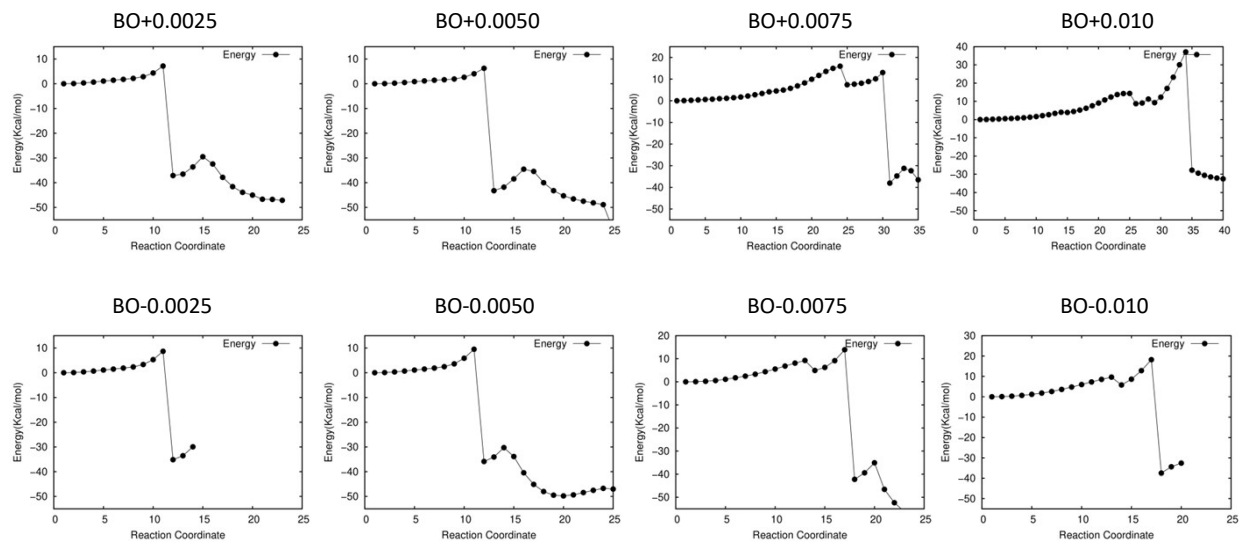

**Figure S9.** Potential Energy Surface profiles of EFE-BO systems.

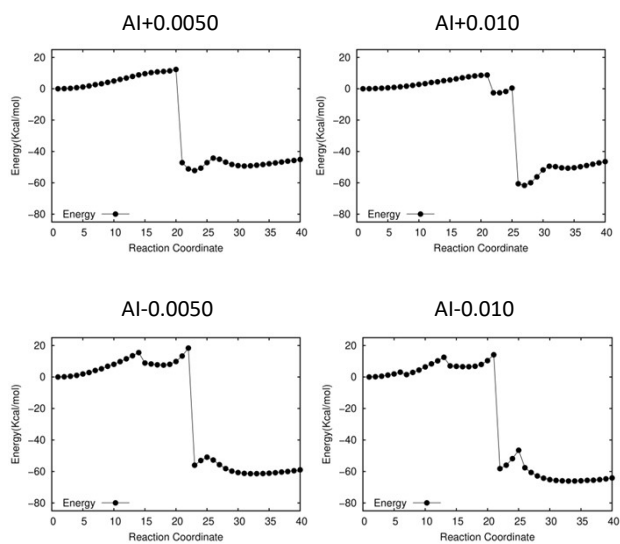

**Figure S10.** Potential Energy Surface profiles of EFE-AI systems.

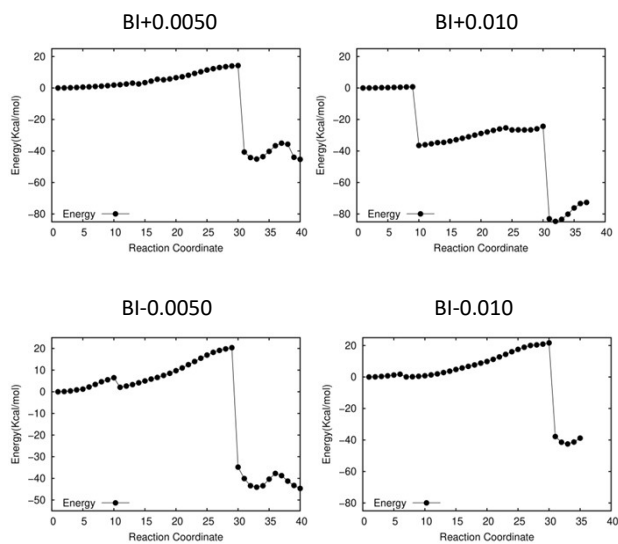

**Figure S11.** Potential Energy Surface profiles of EFE-BI systems.

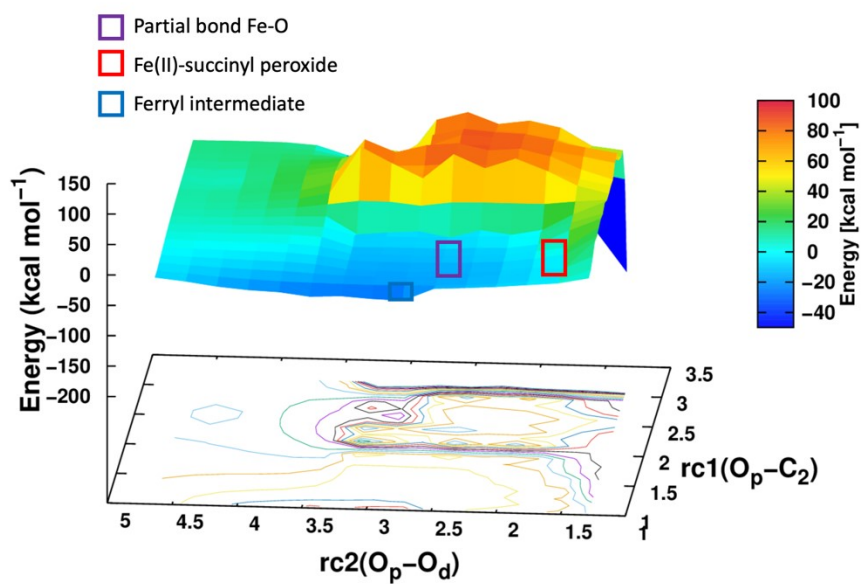

**Figure S12.** Potential Energy Surface obtained from 2D scans in the AI-0.010 system.

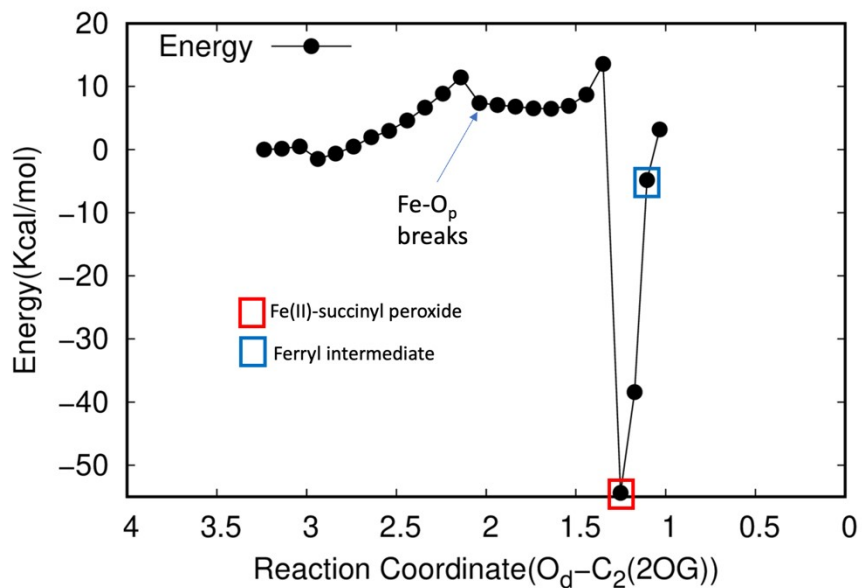

**Figure S13.** Energy profile of the scan in the first dimension with the reaction coordinate  $O_d-C_2(2OG)$  distance for AI-0.010 ExtEF.

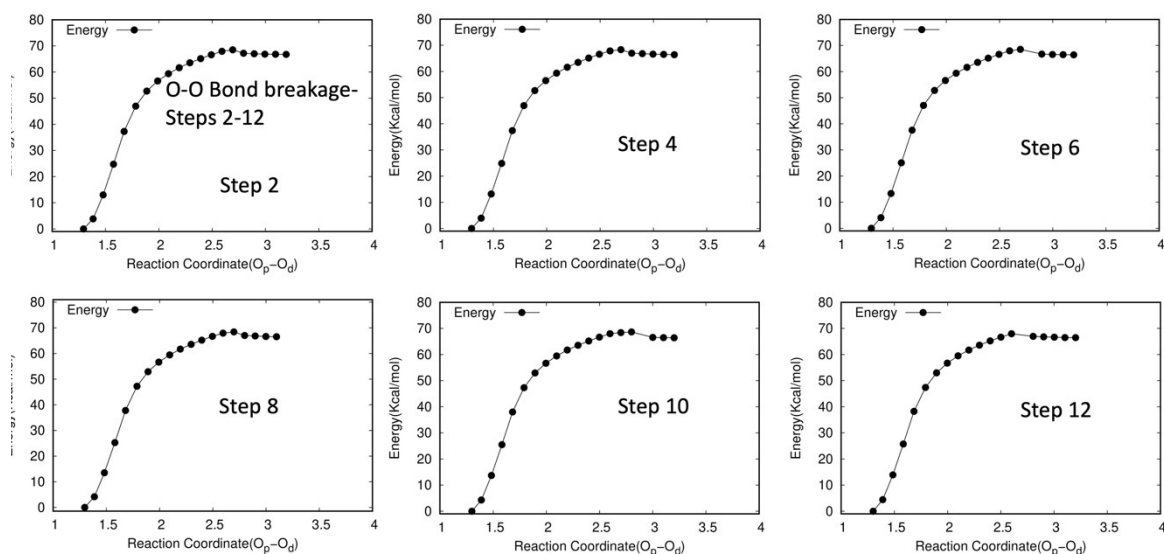

**Figure S14.** Energy profiles of the scans in the second dimension with a reaction coordinate  $O_p-O_d$  distance starting from steps 2 to 12 from the first scan for AI-0.010 ExtEF.

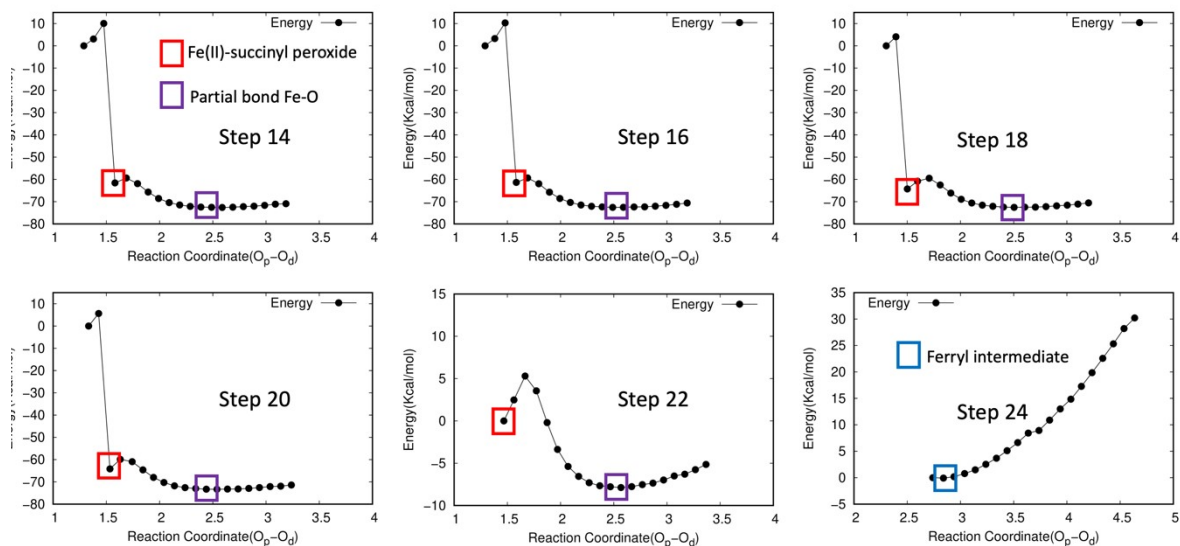

**Figure S15.** Energy profiles of the scans in the second dimension with a reaction coordinate  $O_p-O_d$  distance starting from steps 14 to 24 from the first scan for AI-0.010 ExtEF.

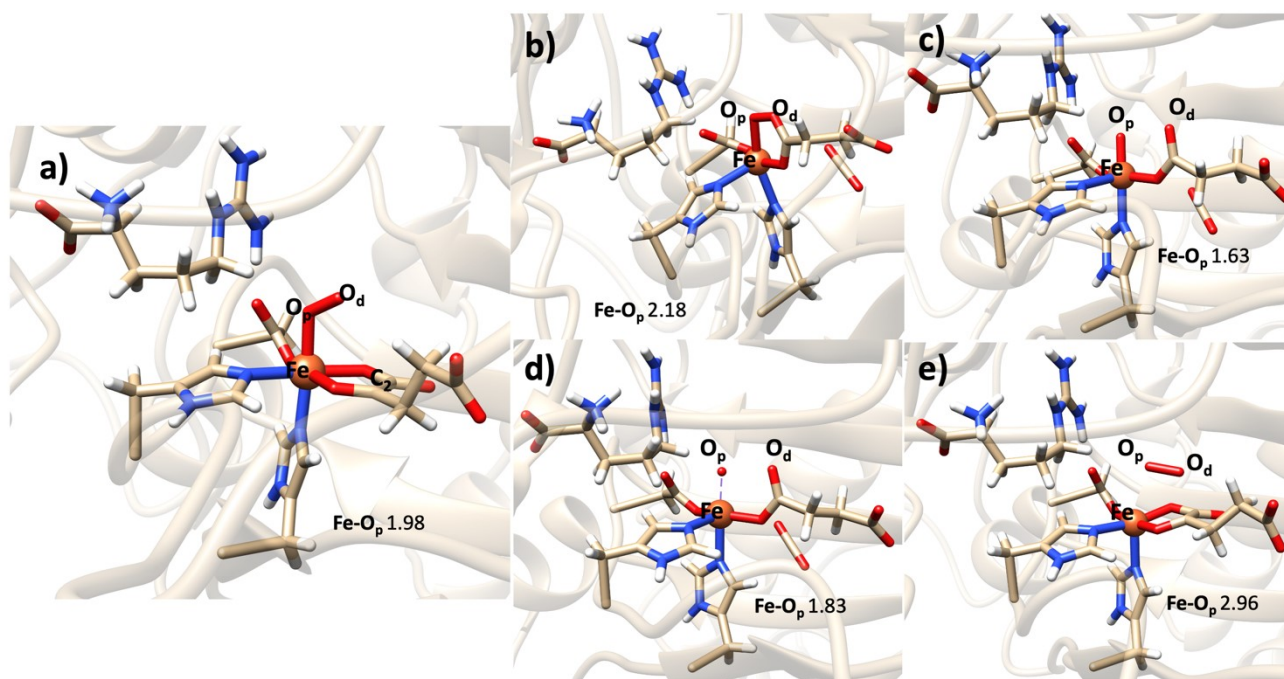

**Figure S16.** Figure showing the stationary points on the PES obtained from 2D scan. a) Initial Fe(III)-superoxo with inline 2OG with L-Arg in A conformation, b) Fe(II)-succinyl peroxide, c) Ferryl, d) Partial bond Fe-O<sub>p</sub> intermediates, and e) Fe-O<sub>p</sub> bond breakage.



**Table S2.** Spin densities of stationary points in the O<sub>2</sub> attack on 2OG for conformation A of L-Arg and off-line 2OG bound to EFE with an ExtEF of +0.0025 au along the Fe-O bond. CO2 is the C1 carboxylate of 2OG. 2OG-CO2 is the rest of 2OG except the C1 carboxylate.

| Spin Density        | FE   | Op    | Od    | CO2   | 2OG-CO2 | L-ARG | D191 | H189 | H268 |
|---------------------|------|-------|-------|-------|---------|-------|------|------|------|
| <b>AO-RC+0.0025</b> | 4.18 | -0.21 | -0.48 | 0.14  | 0.09    | 0.00  | 0.14 | 0.05 | 0.06 |
| <b>AO-TS+0.0025</b> | 4.18 | 0.08  | -0.19 | -0.24 | -0.11   | 0.00  | 0.13 | 0.05 | 0.07 |
| <b>AO-IM+0.0025</b> | 4.24 | -0.19 | -0.56 | 0.19  | 0.02    | 0.00  | 0.15 | 0.07 | 0.05 |

**Table S3.** Mulliken charges of stationary points in the O<sub>2</sub> attack on 2OG for conformation A of L-Arg and off-line 2OG bound to EFE with an ExtEF of +0.0025 au along the Fe-O bond.

| Charge Distribution | FE   | Op    | Od    | CO2   | 2OG-CO2 | L-ARG | D191  | H189 | H268 |
|---------------------|------|-------|-------|-------|---------|-------|-------|------|------|
| <b>AO-RC+0.0025</b> | 0.94 | -0.19 | -0.12 | -0.51 | -1.01   | 0.88  | -0.48 | 0.25 | 0.25 |
| <b>AO-TS+0.0025</b> | 0.95 | -0.28 | -0.11 | -0.36 | -1.08   | 0.87  | -0.49 | 0.25 | 0.25 |
| <b>AO-IM+0.0025</b> | 0.93 | -0.35 | -0.13 | -0.45 | -0.90   | 0.86  | -0.47 | 0.27 | 0.23 |

**Table S4.** Spin densities of stationary points in the O<sub>2</sub> attack on 2OG for conformation A of L-Arg and off-line 2OG bound to EFE with an ExtEF of +0.0050 au along the Fe-O bond.

| Spin Density        | FE   | Op    | Od    | CO2  | 2OG-CO2 | L-ARG | D191 | H189 | H268 |
|---------------------|------|-------|-------|------|---------|-------|------|------|------|
| <b>AO-RC+0.0050</b> | 4.15 | -0.16 | -0.45 | 0.13 | 0.08    | 0.00  | 0.12 | 0.04 | 0.05 |
| <b>AO-TS+0.0050</b> | 4.23 | -0.45 | -0.35 | 0.07 | 0.22    | 0.00  | 0.13 | 0.06 | 0.06 |
| <b>AO-IM+0.0050</b> | 3.82 | 0.02  | 0.02  | 0.01 | 0.00    | 0.05  | 0.02 | 0.02 | 0.00 |

**Table S5.** Mulliken charges of stationary points in the O<sub>2</sub> attack on 2OG for conformation A of L-Arg and off-line 2OG bound to EFE with an ExtEF of +0.0050 au along the Fe-O bond.

| Charge Distribution | FE   | Op    | Od    | CO2   | 2OG-CO2 | L-ARG | D191  | H189 | H268 |
|---------------------|------|-------|-------|-------|---------|-------|-------|------|------|
| <b>AO-</b>          | 0.93 | -0.17 | -0.09 | -0.52 | -0.99   | 0.87  | -0.49 | 0.22 | 0.24 |

|                          |      |       |       |       |       |      |       |      |      |
|--------------------------|------|-------|-------|-------|-------|------|-------|------|------|
| <b>RC+0.0050</b>         |      |       |       |       |       |      |       |      |      |
| <b>AO-<br/>TS+0.0050</b> | 0.95 | -0.16 | -0.07 | -0.46 | -1.14 | 0.87 | -0.49 | 0.25 | 0.25 |
| <b>AO-<br/>IM+0.0050</b> | 0.86 | -0.25 | -0.09 | -0.39 | -0.79 | 0.84 | -0.55 | 0.20 | 0.18 |

**Table S6.** Spin densities of stationary points in the O<sub>2</sub> attack on 2OG for conformation A of L-Arg and off-line 2OG bound to EFE with an ExtEF of +0.0075 au along the Fe-O bond.

| Spin Density             | FE   | Op    | Od    | CO2  | 2OG-CO2 | L-ARG | D191 | H189 | H268 |
|--------------------------|------|-------|-------|------|---------|-------|------|------|------|
| <b>AO-<br/>RC+0.0075</b> | 3.83 | 0.03  | -0.08 | 0.06 | 0.03    | 0.00  | 0.05 | 0.02 | 0.03 |
| <b>AO-<br/>TS+0.0075</b> | 4.23 | -0.42 | -0.35 | 0.07 | 0.20    | 0.00  | 0.12 | 0.06 | 0.06 |
| <b>AO-<br/>IM+0.0075</b> | 3.82 | 0.02  | 0.02  | 0.01 | 0.00    | 0.04  | 0.02 | 0.02 | 0.00 |

**Table S7.** Mulliken charges of stationary points in the O<sub>2</sub> attack on 2OG for conformation A of L-Arg and off-line 2OG bound to EFE with an ExtEF of +0.0075 au along the Fe-O bond.

| Charge Distribution      | FE   | Op    | Od    | CO2   | 2OG-CO2 | L-ARG | D191  | H189 | H268 |
|--------------------------|------|-------|-------|-------|---------|-------|-------|------|------|
| <b>AO-<br/>RC+0.0075</b> | 0.85 | -0.07 | 0.02  | -0.54 | -0.95   | 0.85  | -0.54 | 0.18 | 0.21 |
| <b>AO-<br/>TS+0.0075</b> | 0.95 | -0.16 | -0.07 | -0.46 | -1.11   | 0.86  | -0.49 | 0.23 | 0.25 |
| <b>AO-<br/>IM+0.0075</b> | 0.87 | -0.25 | -0.08 | -0.39 | -0.78   | 0.83  | -0.55 | 0.18 | 0.18 |

**Table S8.** Spin densities of stationary points in the O<sub>2</sub> attack on 2OG for conformation A of L-Arg and off-line 2OG bound to EFE with an ExtEF of +0.010 au along the Fe-O bond.

| Spin Density            | FE   | Op    | Od    | CO2  | 2OG-CO2 | L-ARG | D191 | H189 | H268 |
|-------------------------|------|-------|-------|------|---------|-------|------|------|------|
| <b>AO-<br/>RC+0.010</b> | 3.80 | 0.04  | -0.04 | 0.05 | 0.03    | 0.00  | 0.04 | 0.02 | 0.03 |
| <b>AO-<br/>TS+0.010</b> | 4.22 | -0.25 | -0.30 | 0.01 | 0.07    | 0.00  | 0.11 | 0.05 | 0.06 |
| <b>AO-<br/>IM+0.010</b> | 3.82 | 0.02  | 0.03  | 0.02 | 0.00    | 0.04  | 0.02 | 0.02 | 0.00 |

**Table S9.** Mulliken charges of stationary points in the O<sub>2</sub> attack on 2OG for conformation A of L-Arg and off-line 2OG bound to EFE with an ExtEF of +0.010 au along the Fe-O bond.

| Charge Distribution | FE   | Op    | Od    | CO2   | 2OG-CO2 | L-ARG | D191  | H189 | H268 |
|---------------------|------|-------|-------|-------|---------|-------|-------|------|------|
| <b>AO-RC+0.010</b>  | 0.85 | -0.06 | 0.04  | -0.55 | -0.94   | 0.85  | -0.55 | 0.16 | 0.20 |
| <b>AO-TS+0.010</b>  | 0.94 | -0.20 | -0.07 | -0.45 | -1.02   | 0.85  | -0.49 | 0.20 | 0.24 |
| <b>AO-IM+0.010</b>  | 0.87 | -0.26 | -0.07 | -0.40 | -0.77   | 0.83  | -0.55 | 0.17 | 0.18 |

**Table S10.** Spin densities of stationary points in the O<sub>2</sub> attack on 2OG for conformation A of L-Arg and off-line 2OG bound to EFE with an ExtEF of -0.0025 au along the Fe-O bond.

| Spin Density        | FE   | Op    | Od    | CO2   | 2OG-CO2 | L-ARG | D191 | H189 | H268 |
|---------------------|------|-------|-------|-------|---------|-------|------|------|------|
| <b>AO-RC-0.0025</b> | 4.21 | -0.28 | -0.50 | 0.14  | 0.09    | 0.00  | 0.16 | 0.07 | 0.06 |
| <b>AO-TS-0.0025</b> | 4.20 | 0.05  | -0.19 | -0.25 | -0.11   | 0.00  | 0.14 | 0.06 | 0.07 |
| <b>AO-IM-0.0025</b> | 3.80 | 0.06  | 0.00  | 0.03  | 0.00    | 0.02  | 0.02 | 0.01 | 0.00 |

**Table S11.** Mulliken charges of stationary points in the O<sub>2</sub> attack on 2OG for conformation A of L-Arg and off-line 2OG bound to EFE with an ExtEF of -0.0025 au along the Fe-O bond.

| Charge Density      | FE   | Op    | Od    | CO2   | 2OG-CO2 | L-ARG | D191  | H189 | H268 |
|---------------------|------|-------|-------|-------|---------|-------|-------|------|------|
| <b>AO-RC-0.0025</b> | 0.95 | -0.20 | -0.15 | -0.51 | -1.05   | 0.88  | -0.47 | 0.30 | 0.25 |
| <b>AO-TS-0.0025</b> | 0.95 | -0.30 | -0.13 | -0.36 | -1.10   | 0.88  | -0.49 | 0.29 | 0.26 |
| <b>AO-IM-0.0025</b> | 0.83 | -0.40 | -0.13 | -0.04 | -0.93   | 0.84  | -0.59 | 0.23 | 0.20 |

**Table S12.** Spin densities of stationary points in the O<sub>2</sub> attack on 2OG for conformation A of L-Arg and off-line 2OG bound to EFE with an ExtEF of -0.0050 au along the Fe-O bond.

| Spin Density        | FE   | Op    | Od    | CO2  | 2OG-CO2 | L-ARG | D191 | H189 | H268 |
|---------------------|------|-------|-------|------|---------|-------|------|------|------|
| <b>AO-RC-0.0050</b> | 4.22 | -0.32 | -0.50 | 0.14 | 0.09    | 0.00  | 0.16 | 0.07 | 0.07 |

|                     |      |       |       |       |      |      |      |      |      |
|---------------------|------|-------|-------|-------|------|------|------|------|------|
| <b>AO-TS-0.0050</b> | 4.25 | -0.43 | -0.30 | -0.01 | 0.17 | 0.00 | 0.14 | 0.10 | 0.07 |
| <b>AO-IM-0.0050</b> | 3.80 | 0.06  | 0.00  | 0.03  | 0.00 | 0.02 | 0.03 | 0.01 | 0.00 |

**Table S13.** Mulliken charges of stationary points in the O<sub>2</sub> attack on 2OG for conformation A of L-Arg and off-line 2OG bound to EFE with an ExtEF of -0.0050 au along the Fe-O bond.

| Charge Density      | FE   | Op    | Od    | CO2   | 2OG-CO2 | L-ARG | D191  | H189 | H268 |
|---------------------|------|-------|-------|-------|---------|-------|-------|------|------|
| <b>AO-RC-0.0050</b> | 0.95 | -0.20 | -0.17 | -0.51 | -1.07   | 0.89  | -0.47 | 0.32 | 0.26 |
| <b>AO-TS-0.0050</b> | 0.96 | -0.20 | -0.11 | -0.45 | -1.20   | 0.88  | -0.49 | 0.35 | 0.26 |
| <b>AO-IM-0.0050</b> | 0.83 | -0.41 | -0.14 | -0.04 | -0.94   | 0.85  | -0.60 | 0.25 | 0.20 |

**Table S14.** Spin densities of stationary points in the O<sub>2</sub> attack on 2OG for conformation A of L-Arg and off-line 2OG bound to EFE with an ExtEF of -0.0075 au along the Fe-O bond.

| Spin Density        | FE   | Op    | Od    | CO2   | 2OG-CO2 | L-ARG | D191 | H189 | H268 |
|---------------------|------|-------|-------|-------|---------|-------|------|------|------|
| <b>AO-RC-0.0075</b> | 4.23 | -0.35 | -0.49 | 0.14  | 0.09    | 0.00  | 0.17 | 0.10 | 0.07 |
| <b>AO-TS-0.0075</b> | 4.21 | 0.05  | -0.18 | -0.29 | -0.12   | 0.00  | 0.15 | 0.08 | 0.08 |
| <b>AO-IM-0.0075</b> | 3.82 | 0.01  | 0.01  | 0.00  | 0.05    | 0.02  | 0.02 | 0.00 | 0.00 |

**Table S15.** Mulliken charges of stationary points in the O<sub>2</sub> attack on 2OG for conformation A of L-Arg and off-line 2OG bound to EFE with an ExtEF of -0.0075 au along the Fe-O bond.

| Charge Distribution | FE   | Op    | Od    | CO2   | 2OG-CO2 | L-ARG | D191  | H189 | H268 |
|---------------------|------|-------|-------|-------|---------|-------|-------|------|------|
| <b>AO-RC-0.0075</b> | 0.95 | -0.20 | -0.18 | -0.51 | -1.09   | 0.89  | -0.48 | 0.35 | 0.26 |
| <b>AO-TS-0.0075</b> | 0.95 | -0.33 | -0.16 | -0.35 | -1.13   | 0.89  | -0.49 | 0.34 | 0.27 |
| <b>AO-IM-0.0075</b> | 0.87 | -0.25 | -0.14 | -0.42 | -0.81   | 0.86  | -0.58 | 0.29 | 0.18 |

**Table S16.** Spin densities of stationary points in the O<sub>2</sub> attack on 2OG for conformation A of L-Arg and off-line 2OG bound to EFE with an ExtEF of -0.010 au along the Fe-O bond.

| Spin Density       | FE   | Op    | Od    | CO2   | 2OG-CO2 | L-ARG | D191 | H189 | H268 |
|--------------------|------|-------|-------|-------|---------|-------|------|------|------|
| <b>AO-RC-0.010</b> | 4.23 | -0.38 | -0.49 | 0.14  | 0.10    | 0.00  | 0.17 | 0.13 | 0.07 |
| <b>AO-TS-0.010</b> | 4.25 | -0.33 | -0.24 | -0.02 | 0.15    | -0.15 | 0.14 | 0.12 | 0.07 |
| <b>AO-IM-0.010</b> | 3.83 | 0.01  | 0.01  | 0.00  | 0.05    | 0.03  | 0.02 | 0.00 | 0.00 |

**Table S17.** Mulliken charges of stationary points in the O<sub>2</sub> attack on 2OG for conformation A of L-Arg and off-line 2OG bound to EFE with an ExtEF of -0.010 au along the Fe-O bond.

| Charge Distribution | FE   | Op    | Od    | CO2   | 2OG-CO2 | L-ARG | D191  | H189 | H268 |
|---------------------|------|-------|-------|-------|---------|-------|-------|------|------|
| <b>AO-RC-0.010</b>  | 0.95 | -0.21 | -0.20 | -0.51 | -1.11   | 0.89  | -0.47 | 0.38 | 0.27 |
| <b>AO-TS-0.010</b>  | 0.96 | -0.25 | -0.16 | -0.47 | -1.24   | 1.03  | -0.50 | 0.37 | 0.26 |
| <b>AO-IM-0.010</b>  | 0.88 | -0.25 | -0.15 | -0.42 | -0.82   | 0.86  | -0.59 | 0.31 | 0.18 |

**Table S18.** Spin densities of stationary points in the O<sub>2</sub> attack on 2OG for conformation B of L-Arg and off-line 2OG bound to EFE with an ExtEF of +0.0025 au along the Fe-O bond.

| Spin Density        | FE   | Op    | Od    | CO2  | 2OG-CO2 | L-ARG | D191 | H189 | H268 |
|---------------------|------|-------|-------|------|---------|-------|------|------|------|
| <b>BO-RC+0.0025</b> | 4.19 | -0.23 | -0.49 | 0.13 | 0.09    | 0.00  | 0.13 | 0.06 | 0.07 |
| <b>BO-TS+0.0025</b> | 4.24 | -0.42 | -0.32 | 0.03 | 0.16    | 0.00  | 0.12 | 0.07 | 0.07 |
| <b>BO-IM+0.0025</b> | 3.82 | 0.02  | 0.02  | 0.01 | 0.00    | 0.06  | 0.02 | 0.02 | 0.00 |

**Table S19.** Mulliken charges of stationary points in the O<sub>2</sub> attack on 2OG for conformation B of L-Arg and off-line 2OG bound to EFE with an ExtEF of +0.0025 au along the Fe-O bond.

| Charge Distribution | FE   | Op    | Od    | CO2   | 2OG-CO2 | L-ARG | D191  | H189 | H268 |
|---------------------|------|-------|-------|-------|---------|-------|-------|------|------|
| <b>BO-RC+0.0025</b> | 0.93 | -0.19 | -0.13 | -0.52 | -1.01   | 0.85  | -0.46 | 0.27 | 0.26 |

|                          |      |       |       |       |       |      |       |      |      |
|--------------------------|------|-------|-------|-------|-------|------|-------|------|------|
| <b>BO-<br/>TS+0.0025</b> | 0.94 | -0.18 | -0.09 | -0.47 | -1.13 | 0.85 | -0.48 | 0.29 | 0.26 |
| <b>BO-<br/>IM+0.0025</b> | 0.86 | -0.25 | -0.10 | -0.41 | -0.80 | 0.82 | -0.54 | 0.23 | 0.18 |

**Table S20.** Spin densities of stationary points in the O<sub>2</sub> attack on 2OG for conformation B of L-Arg and off-line 2OG bound to EFE with an ExtEF of +0.0050 au along the Fe-O bond.

| Spin Density             | FE   | Op    | Od    | CO2   | 2OG-CO2 | L-ARG | D191 | H189 | H268 |
|--------------------------|------|-------|-------|-------|---------|-------|------|------|------|
| <b>BO-<br/>RC+0.0050</b> | 4.16 | -0.16 | -0.47 | 0.12  | 0.09    | 0.00  | 0.11 | 0.05 | 0.06 |
| <b>BO-<br/>TS+0.0050</b> | 4.21 | -0.04 | -0.23 | -0.08 | -0.12   | 0.00  | 0.11 | 0.05 | 0.07 |
| <b>BO-<br/>IM+0.0050</b> | 4.18 | 0.24  | -0.37 | 0.26  | -0.53   | 0.00  | 0.09 | 0.06 | 0.05 |

**Table S21.** Mulliken charges of stationary points in the O<sub>2</sub> attack on 2OG for conformation B of L-Arg and off-line 2OG bound to EFE with an ExtEF of +0.0050 au along the Fe-O bond.

| Charge Distribution      | FE   | Op    | Od    | CO2   | 2OG-CO2 | L-ARG | D191  | H189 | H268 |
|--------------------------|------|-------|-------|-------|---------|-------|-------|------|------|
| <b>BO-<br/>RC+0.0050</b> | 0.92 | -0.17 | -0.09 | -0.52 | -0.98   | 0.84  | -0.48 | 0.22 | 0.25 |
| <b>BO-<br/>TS+0.0050</b> | 0.94 | -0.26 | -0.10 | -0.44 | -0.96   | 0.84  | -0.49 | 0.22 | 0.25 |
| <b>BO-<br/>IM+0.0050</b> | 0.87 | -0.41 | -0.16 | -0.54 | -0.52   | 0.83  | -0.51 | 0.22 | 0.21 |

**Table S22.** Spin densities of stationary points in the O<sub>2</sub> attack on 2OG for conformation B of L-Arg and off-line 2OG bound to EFE with an ExtEF of +0.0075 au along the Fe-O bond.

| Spin Density             | FE   | Op   | Od    | CO2   | 2OG-CO2 | L-ARG | D191 | H189 | H268 |
|--------------------------|------|------|-------|-------|---------|-------|------|------|------|
| <b>BO-<br/>RC+0.0075</b> | 3.81 | 0.04 | -0.07 | 0.06  | 0.03    | 0.00  | 0.04 | 0.02 | 0.03 |
| <b>BO-<br/>TS+0.0075</b> | 4.16 | 0.25 | -0.09 | -0.17 | -0.37   | 0.00  | 0.09 | 0.04 | 0.07 |
| <b>BO-<br/>IM+0.0075</b> | 3.82 | 0.02 | 0.02  | 0.01  | 0.00    | 0.04  | 0.02 | 0.02 | 0.00 |

**Table S23.** Mulliken charges of stationary points in the O<sub>2</sub> attack on 2OG for conformation B of L-Arg and off-line 2OG bound to EFE with an ExtEF of +0.0075 au along the Fe-O bond.

| Charge Distribution | FE   | Op    | Od    | CO2   | 2OG-CO2 | L-ARG | D191  | H189 | H268 |
|---------------------|------|-------|-------|-------|---------|-------|-------|------|------|
| <b>BO-RC+0.0075</b> | 0.84 | -0.08 | 0.04  | -0.56 | -0.91   | 0.83  | -0.55 | 0.18 | 0.22 |
| <b>BO-TS+0.0075</b> | 0.93 | -0.28 | -0.11 | -0.43 | -0.85   | 0.83  | -0.51 | 0.18 | 0.24 |
| <b>BO-IM+0.0075</b> | 0.87 | -0.25 | -0.07 | -0.41 | -0.77   | 0.82  | -0.55 | 0.18 | 0.19 |

**Table S24.** Spin densities of stationary points in the O<sub>2</sub> attack on 2OG for conformation B of L-Arg and off-line 2OG bound to EFE with an ExtEF of +0.010 au along the Fe-O bond.

| Spin Density       | FE   | Op   | Od    | CO2   | 2OG-CO2 | L-ARG | D191 | H189 | H268 |
|--------------------|------|------|-------|-------|---------|-------|------|------|------|
| <b>BO-RC+0.010</b> | 3.79 | 0.04 | -0.04 | 0.06  | 0.03    | 0.00  | 0.03 | 0.02 | 0.02 |
| <b>BO-TS+0.010</b> | 3.76 | 0.00 | 0.00  | -0.01 | 0.03    | 0.00  | 0.05 | 0.01 | 0.02 |
| <b>BO-IM+0.010</b> | 3.82 | 0.02 | 0.02  | 0.02  | 0.00    | 0.04  | 0.02 | 0.02 | 0.00 |

**Table S25.** Mulliken charges of stationary points in the O<sub>2</sub> attack on 2OG for conformation B of L-Arg and off-line 2OG bound to EFE with an ExtEF of +0.010 au along the Fe-O bond.

| Charge Distribution | FE   | Op    | Od    | CO2   | 2OG-CO2 | L-ARG | D191  | H189 | H268 |
|---------------------|------|-------|-------|-------|---------|-------|-------|------|------|
| <b>BO-RC+0.010</b>  | 0.84 | -0.07 | 0.07  | -0.58 | -0.90   | 0.82  | -0.55 | 0.16 | 0.22 |
| <b>BO-TS+0.010</b>  | 0.81 | -0.09 | -0.09 | -0.04 | -0.90   | 0.81  | -0.54 | 0.11 | 0.21 |
| <b>BO-IM+0.010</b>  | 0.87 | -0.06 | -0.06 | -0.43 | -0.75   | 0.81  | -0.54 | 0.17 | 0.20 |

**Table S26.** Spin densities of stationary points in the O<sub>2</sub> attack on 2OG for conformation B of L-Arg and off-line 2OG bound to EFE with an ExtEF of -0.0025 au along the Fe-O bond.

| Spin Density        | FE   | Op    | Od    | CO2   | 2OG-CO2 | L-ARG | D191 | H189 | H268 |
|---------------------|------|-------|-------|-------|---------|-------|------|------|------|
| <b>BO-RC-0.0025</b> | 4.21 | -0.27 | -0.50 | 0.14  | 0.09    | 0.00  | 0.14 | 0.07 | 0.07 |
| <b>BO-TS-0.0025</b> | 4.24 | -0.39 | -0.31 | -0.01 | 0.16    | 0.00  | 0.13 | 0.09 | 0.07 |

|                     |      |      |      |      |      |      |      |      |      |
|---------------------|------|------|------|------|------|------|------|------|------|
| <b>BO-IM-0.0025</b> | 3.82 | 0.01 | 0.02 | 0.01 | 0.00 | 0.05 | 0.02 | 0.02 | 0.00 |
|---------------------|------|------|------|------|------|------|------|------|------|

**Table S27.** Mulliken charges of stationary points in the O<sub>2</sub> attack on 2OG for conformation B of L-Arg and off-line 2OG bound to EFE with an ExtEF of -0.0025 au along the Fe-O bond.

| Charge Distribution | FE   | Op    | Od    | CO2   | 2OG-CO2 | L-ARG | D191  | H189 | H268 |
|---------------------|------|-------|-------|-------|---------|-------|-------|------|------|
| <b>BO-RC-0.0025</b> | 0.93 | -0.19 | -0.14 | -0.52 | -1.02   | 0.85  | -0.46 | 0.30 | 0.26 |
| <b>BO-TS-0.0025</b> | 0.94 | -0.20 | -0.10 | -0.46 | -1.15   | 0.85  | -0.48 | 0.32 | 0.26 |
| <b>BO-IM-0.0025</b> | 0.86 | -0.25 | -0.12 | -0.41 | -0.80   | 0.83  | -0.54 | 0.25 | 0.18 |

**Table S28.** Spin densities of stationary points in the O<sub>2</sub> attack on 2OG for conformation B of L-Arg and off-line 2OG bound to EFE with an ExtEF of -0.0050 au along the Fe-O bond.

| Spin Density        | FE   | Op    | Od    | CO2   | 2OG-CO2 | L-ARG | D191 | H189 | H268 |
|---------------------|------|-------|-------|-------|---------|-------|------|------|------|
| <b>BO-RC-0.0050</b> | 4.22 | -0.30 | -0.50 | 0.14  | 0.09    | 0.00  | 0.14 | 0.07 | 0.07 |
| <b>BO-TS-0.0050</b> | 4.24 | -0.38 | -0.30 | -0.03 | 0.14    | 0.00  | 0.13 | 0.11 | 0.07 |
| <b>BO-IM-0.0050</b> | 3.82 | 0.01  | 0.02  | 0.01  | 0.00    | 0.05  | 0.03 | 0.02 | 0.00 |

**Table S29.** Mulliken charges of stationary points in the O<sub>2</sub> attack on 2OG for conformation B of L-Arg and off-line 2OG bound to EFE with an ExtEF of -0.0050 au along the Fe-O bond.

| Charge Distribution | FE   | Op    | Od    | CO2   | 2OG-CO2 | L-ARG | D191  | H189 | H268 |
|---------------------|------|-------|-------|-------|---------|-------|-------|------|------|
| <b>BO-RC-0.0050</b> | 0.93 | -0.20 | -0.16 | -0.52 | -1.04   | 0.85  | -0.46 | 0.32 | 0.26 |
| <b>BO-TS-0.0050</b> | 0.95 | -0.21 | -0.11 | -0.45 | -1.16   | 0.85  | -0.48 | 0.34 | 0.26 |
| <b>BO-IM-0.0050</b> | 0.86 | -0.26 | -0.12 | -0.39 | -0.81   | 0.83  | -0.55 | 0.27 | 0.18 |



**Table S30.** Spin densities of stationary points in the O<sub>2</sub> attack on 2OG for conformation B of L-Arg and off-line 2OG bound to EFE with an ExtEF of -0.0075 au along the Fe-O bond.

| Spin Density        | FE   | Op   | Od   | CO2   | 2OG-CO2 | L-ARG | D191 | H189  | H268  |
|---------------------|------|------|------|-------|---------|-------|------|-------|-------|
| <b>BO-RC-0.0075</b> | 3.44 | 0.14 | 0.26 | 0.05  | 0.02    | 0.00  | 0.05 | -0.01 | 0.02  |
| <b>BO-TS-0.0075</b> | 2.89 | 0.57 | 0.42 | -0.03 | 0.10    | 0.00  | 0.10 | -0.01 | -0.05 |
| <b>BO-IM-0.0075</b> | 3.82 | 0.01 | 0.02 | 0.01  | 0.00    | 0.05  | 0.03 | 0.02  | 0.00  |

**Table S31.** Mulliken charges of stationary points in the O<sub>2</sub> attack on 2OG for conformation B of L-Arg and off-line 2OG bound to EFE with an ExtEF of -0.0075 au along the Fe-O bond.

| Charge Distribution | FE   | Op    | Od    | CO2   | 2OG-CO2 | L-ARG | D191  | H189 | H268 |
|---------------------|------|-------|-------|-------|---------|-------|-------|------|------|
| <b>BO-RC-0.0075</b> | 0.81 | -0.11 | -0.12 | -0.52 | -1.01   | 0.84  | -0.51 | 0.36 | 0.26 |
| <b>BO-TS-0.0075</b> | 0.79 | -0.15 | -0.15 | -0.44 | -1.15   | 0.85  | -0.50 | 0.39 | 0.35 |
| <b>BO-IM-0.0075</b> | 0.86 | -0.26 | -0.13 | -0.39 | -0.82   | 0.84  | -0.55 | 0.29 | 0.18 |

**Table S32.** Spin densities of stationary points in the O<sub>2</sub> attack on 2OG for conformation B of L-Arg and off-line 2OG bound to EFE with an ExtEF of -0.010 au along the Fe-O bond.

| Spin Density       | FE   | Op    | Od   | CO2   | 2OG-CO2 | L-ARG | D191 | H189  | H268  |
|--------------------|------|-------|------|-------|---------|-------|------|-------|-------|
| <b>BO-RC-0.010</b> | 3.30 | 0.20  | 0.36 | 0.05  | 0.02    | 0.00  | 0.05 | -0.02 | 0.01  |
| <b>BO-TS-0.010</b> | 2.88 | 0.63  | 0.37 | -0.02 | 0.08    | 0.00  | 0.09 | 0.02  | -0.06 |
| <b>BO-IM-0.010</b> | 3.95 | -0.17 | 0.00 | 0.04  | 0.00    | 0.05  | 0.04 | 0.04  | 0.00  |

**Table S33.** Mulliken charges of stationary points in the O<sub>2</sub> attack on 2OG for conformation B of L-Arg and off-line 2OG bound to EFE with an ExtEF of -0.010 au along the Fe-O bond.

| Charge Distribution | FE   | Op    | Od    | CO2   | 2OG-CO2 | L-ARG | D191  | H189 | H268 |
|---------------------|------|-------|-------|-------|---------|-------|-------|------|------|
| <b>BO-RC-0.010</b>  | 0.80 | -0.13 | -0.16 | -0.51 | -1.02   | 0.85  | -0.50 | 0.41 | 0.27 |

|                    |      |       |       |       |       |      |       |      |      |
|--------------------|------|-------|-------|-------|-------|------|-------|------|------|
| <b>BO-TS-0.010</b> | 0.80 | -0.15 | -0.16 | -0.44 | -1.16 | 0.86 | -0.49 | 0.38 | 0.36 |
| <b>BO-IM-0.010</b> | 0.88 | -0.42 | -0.20 | -0.07 | -0.99 | 0.83 | -0.54 | 0.30 | 0.21 |

**Table S34.** Spin densities of stationary points in the O<sub>2</sub> attack on 2OG for conformation A of L-Arg and in-line 2OG bound to EFE with an ExtEF of +0.0050 au along the Fe-O bond.

| Spin Density        | FE   | Op    | Od    | CO2  | 2OG-CO2 | L-ARG | D191 | H189 | H268 |
|---------------------|------|-------|-------|------|---------|-------|------|------|------|
| <b>AI-RC+0.0050</b> | 4.16 | -0.47 | -0.15 | 0.16 | 0.06    | 0.00  | 0.12 | 0.05 | 0.05 |
| <b>AI-TS+0.0050</b> | 4.24 | -0.35 | -0.48 | 0.12 | 0.19    | 0.00  | 0.11 | 0.05 | 0.08 |
| <b>AI-IM+0.0050</b> | 3.81 | 0.01  | 0.07  | 0.00 | 0.03    | 0.00  | 0.03 | 0.02 | 0.02 |

**Table S35.** Mulliken charges of stationary points in the O<sub>2</sub> attack on 2OG for conformation A of L-Arg and in-line 2OG bound to EFE with an ExtEF of +0.0050 au along the Fe-O bond.

| Charge Distribution | FE   | Op    | Od    | CO2   | 2OG-CO2 | L-ARG | D191  | H189 | H268 |
|---------------------|------|-------|-------|-------|---------|-------|-------|------|------|
| <b>AI-RC+0.0050</b> | 0.93 | -0.21 | -0.19 | -0.40 | -0.97   | 0.90  | -0.47 | 0.24 | 0.19 |
| <b>AI-TS+0.0050</b> | 0.92 | -0.12 | -0.20 | -0.34 | -1.17   | 0.90  | -0.48 | 0.25 | 0.23 |
| <b>AI-IM+0.0050</b> | 0.83 | -0.16 | -0.42 | 0.01  | -0.90   | 0.88  | -0.54 | 0.19 | 0.12 |

**Table S36.** Spin densities of stationary points in the O<sub>2</sub> attack on 2OG for conformation A of L-Arg and in-line 2OG bound to EFE with an ExtEF of +0.010 au along the Fe-O bond.

| Spin Density       | FE   | Op    | Od    | CO2  | 2OG-CO2 | L-ARG | D191 | H189 | H268 |
|--------------------|------|-------|-------|------|---------|-------|------|------|------|
| <b>AI-RC+0.010</b> | 3.97 | -0.27 | -0.02 | 0.11 | 0.04    | 0.00  | 0.09 | 0.04 | 0.03 |
| <b>AI-TS+0.010</b> | 4.23 | -0.44 | -0.44 | 0.20 | 0.19    | 0.00  | 0.11 | 0.05 | 0.07 |
| <b>AI-IM+0.010</b> | 3.78 | 0.09  | 0.00  | 0.03 | 0.00    | 0.04  | 0.02 | 0.02 | 0.00 |

**Table S37.** Mulliken charges of stationary points in the O<sub>2</sub> attack on 2OG for conformation A of L-Arg and in-line 2OG bound to EFE with an ExtEF of +0.010 au along the Fe-O bond.

| Charge Distribution | FE   | Op    | Od    | CO2   | 2OG-CO2 | L-ARG | D191  | H189 | H268 |
|---------------------|------|-------|-------|-------|---------|-------|-------|------|------|
| <b>AI-RC+0.010</b>  | 0.89 | -0.07 | -0.12 | -0.44 | -1.00   | 0.92  | -0.51 | 0.20 | 0.13 |
| <b>AI-TS+0.010</b>  | 0.91 | -0.10 | -0.16 | -0.37 | -1.14   | 0.94  | -0.48 | 0.23 | 0.18 |
| <b>AI-IM+0.010</b>  | 0.82 | -0.10 | -0.39 | 0.00  | -0.93   | 0.94  | -0.55 | 0.15 | 0.07 |

**Table S38.** Spin densities of stationary points in the O<sub>2</sub> attack on 2OG for conformation A of L-Arg and in-line 2OG bound to EFE with an ExtEF of -0.0050 au along the Fe-O bond.

| Spin Density        | FE   | Op   | Od   | CO2  | 2OG-CO2 | L-ARG | D191  | H189 | H268  |
|---------------------|------|------|------|------|---------|-------|-------|------|-------|
| <b>AI-RC-0.0050</b> | 3.14 | 0.43 | 0.27 | 0.09 | 0.03    | 0.00  | 0.04  | 0.00 | -0.03 |
| <b>AI-TS-0.0050</b> | 2.90 | 0.28 | 0.43 | 0.21 | 0.06    | 0.00  | -0.02 | 0.01 | 0.10  |
| <b>AI-IM-0.0050</b> | 3.82 | 0.05 | 0.00 | 0.02 | 0.00    | 0.03  | 0.02  | 0.02 | 0.00  |

**Table S39.** Mulliken charges of stationary points in the O<sub>2</sub> attack on 2OG for conformation A of L-Arg and in-line 2OG bound to EFE with an ExtEF of -0.0050 au along the Fe-O bond.

| Charge Distribution | FE   | Op    | Od    | CO2   | 2OG-CO2 | L-ARG | D191  | H189 | H268 |
|---------------------|------|-------|-------|-------|---------|-------|-------|------|------|
| <b>AI-RC-0.0050</b> | 0.81 | -0.27 | -0.16 | -0.36 | -1.00   | 0.81  | -0.48 | 0.29 | 0.36 |
| <b>AI-TS-0.0050</b> | 0.80 | -0.12 | -0.36 | -0.27 | -1.10   | 0.82  | -0.43 | 0.35 | 0.31 |
| <b>AI-IM-0.0050</b> | 0.84 | -0.21 | -0.45 | 0.02  | -0.88   | 0.79  | -0.52 | 0.21 | 0.21 |

**Table S40.** Spin densities of stationary points in the O<sub>2</sub> attack on 2OG for conformation A of L-Arg and in-line 2OG bound to EFE with an ExtEF of -0.010 au along the Fe-O bond.

| Spin Density       | FE   | Op   | Od   | CO2  | 2OG-CO2 | L-ARG | D191  | H189  | H268  |
|--------------------|------|------|------|------|---------|-------|-------|-------|-------|
| <b>AI-RC-0.010</b> | 3.04 | 0.48 | 0.33 | 0.09 | 0.04    | 0.00  | 0.05  | 0.00  | -0.04 |
| <b>AI-TS-0.010</b> | 2.91 | 0.37 | 0.46 | 0.27 | 0.11    | 0.00  | -0.01 | -0.01 | 0.15  |

|                    |      |      |      |      |      |      |      |      |      |
|--------------------|------|------|------|------|------|------|------|------|------|
| <b>AI-IM-0.010</b> | 3.82 | 0.04 | 0.00 | 0.02 | 0.00 | 0.03 | 0.02 | 0.03 | 0.00 |
|--------------------|------|------|------|------|------|------|------|------|------|

**Table S41.** Mulliken charges of stationary points in the O<sub>2</sub> attack on 2OG for conformation A of L-Arg and in-line 2OG bound to EFE with an ExtEF of -0.010 au along the Fe-O bond.

| Charge Distribution | FE   | Op    | Od    | CO2   | 2OG-CO2 | L-ARG | D191  | H189 | H268 |
|---------------------|------|-------|-------|-------|---------|-------|-------|------|------|
| <b>AI-RC-0.010</b>  | 0.80 | -0.32 | -0.18 | -0.34 | -1.00   | 0.76  | -0.47 | 0.31 | 0.44 |
| <b>AI-TS-0.010</b>  | 0.93 | 0.24  | 0.01  | 1.37  | -0.75   | 0.81  | -0.26 | 0.38 | 0.36 |
| <b>AI-IM-0.010</b>  | 0.84 | -0.22 | -0.48 | 0.02  | -0.87   | 0.74  | -0.50 | 0.22 | 0.25 |

**Table S42.** Spin densities of stationary points in the O<sub>2</sub> attack on 2OG for conformation B of L-Arg and in-line 2OG bound to EFE with an ExtEF of +0.0050 au along the Fe-O bond.

| Spin Density        | FE   | Op    | Od    | CO2  | 2OG-CO2 | L-ARG | D191 | H189 | H268 |
|---------------------|------|-------|-------|------|---------|-------|------|------|------|
| <b>BI-RC+0.0050</b> | 3.92 | -0.23 | 0.02  | 0.09 | 0.03    | 0.00  | 0.08 | 0.03 | 0.03 |
| <b>BI-TS+0.0050</b> | 4.24 | -0.33 | -0.44 | 0.10 | 0.16    | 0.00  | 0.11 | 0.06 | 0.08 |
| <b>BI-IM+0.0050</b> | 3.80 | 0.01  | 0.07  | 0.00 | 0.00    | 0.00  | 0.03 | 0.02 | 0.02 |

**Table S43.** Mulliken charges of stationary points in the O<sub>2</sub> attack on 2OG for conformation B of L-Arg and in-line 2OG bound to EFE with an ExtEF of +0.0050 au along the Fe-O bond.

| Charge Distribution | FE   | Op    | Od    | CO2   | 2OG-CO2 | L-ARG | D191  | H189 | H268 |
|---------------------|------|-------|-------|-------|---------|-------|-------|------|------|
| <b>BI-RC+0.0050</b> | 0.86 | -0.04 | -0.13 | -0.42 | -1.06   | 0.90  | -0.50 | 0.22 | 0.18 |
| <b>BI-TS+0.0050</b> | 0.92 | -0.17 | -0.17 | -0.34 | -1.16   | 0.91  | -0.47 | 0.24 | 0.23 |
| <b>BI-IM+0.0050</b> | 0.84 | -0.19 | -0.47 | 0.01  | -0.89   | 0.91  | -0.52 | 0.19 | 0.13 |

**Table S44.** Spin densities of stationary points in the O<sub>2</sub> attack on 2OG for conformation B of L-Arg and in-line 2OG bound to EFE with an ExtEF of +0.010 au along the Fe-O bond.

| Spin Density       | FE   | Op    | Od    | CO2  | 2OG-CO2 | L-ARG | D191 | H189 | H268  |
|--------------------|------|-------|-------|------|---------|-------|------|------|-------|
| <b>BI-RC+0.010</b> | 2.25 | 0.91  | 0.75  | 0.02 | 0.02    | 0.00  | 0.08 | 0.00 | -0.03 |
| <b>BI-TS+0.010</b> | 4.24 | -0.33 | -0.38 | 0.04 | 0.17    | 0.00  | 0.12 | 0.06 | 0.07  |
| <b>BI-IM+0.010</b> | 3.78 | 0.10  | 0.00  | 0.03 | 0.00    | 0.03  | 0.02 | 0.02 | 0.00  |

**Table S45.** Mulliken charges of stationary points in the O<sub>2</sub> attack on 2OG for conformation B of L-Arg and in-line 2OG bound to EFE with an ExtEF of +0.010 au along the Fe-O bond.

| Charge Distribution | FE   | Op    | Od    | CO2   | 2OG-CO2 | L-ARG | D191  | H189 | H268 |
|---------------------|------|-------|-------|-------|---------|-------|-------|------|------|
| <b>BI-RC+0.010</b>  | 0.75 | 0.01  | -0.07 | -0.43 | -1.08   | 0.94  | -0.52 | 0.22 | 0.19 |
| <b>BI-TS+0.010</b>  | 0.92 | -0.06 | -0.17 | -0.36 | -1.19   | 0.94  | -0.48 | 0.23 | 0.17 |
| <b>BI-IM+0.010</b>  | 0.82 | -0.08 | -0.39 | -0.00 | -0.96   | 0.94  | -0.55 | 0.15 | 0.07 |

**Table S46.** Spin densities of stationary points in the O<sub>2</sub> attack on 2OG for conformation B of L-Arg and in-line 2OG bound to EFE with an ExtEF of -0.0050 au along the Fe-O bond.

| Spin Density        | FE   | Op    | Od    | CO2  | 2OG-CO2 | L-ARG | D191 | H189 | H268 |
|---------------------|------|-------|-------|------|---------|-------|------|------|------|
| <b>BI-RC-0.0050</b> | 4.21 | -0.51 | -0.22 | 0.19 | 0.05    | 0.00  | 0.12 | 0.06 | 0.08 |
| <b>BI-TS-0.0050</b> | 4.24 | -0.34 | -0.52 | 0.16 | 0.18    | 0.00  | 0.09 | 0.05 | 0.12 |
| <b>BI-IM-0.0050</b> | 3.81 | 0.06  | 0.00  | 0.02 | 0.00    | 0.03  | 0.01 | 0.02 | 0.00 |

**Table S47.** Mulliken charges of stationary points in the O<sub>2</sub> attack on 2OG for conformation B of L-Arg and in-line 2OG bound to EFE with an ExtEF of -0.0050 au along the Fe-O bond.

| Charge Distribution | FE   | Op    | Od    | CO2   | 2OG-CO2 | L-ARG | D191  | H189 | H268 |
|---------------------|------|-------|-------|-------|---------|-------|-------|------|------|
| <b>BI-RC-0.0050</b> | 0.94 | -0.18 | -0.31 | -0.36 | -1.01   | 0.81  | -0.43 | 0.25 | 0.30 |

|                     |      |       |       |       |       |      |       |      |      |
|---------------------|------|-------|-------|-------|-------|------|-------|------|------|
| <b>BI-TS-0.0050</b> | 0.92 | -0.22 | -0.17 | -0.33 | -1.13 | 0.82 | -0.46 | 0.24 | 0.33 |
| <b>BI-IM-0.0050</b> | 0.83 | -0.17 | -0.48 | 0.01  | -0.89 | 0.80 | -0.52 | 0.20 | 0.22 |

**Table S48.** Spin densities of stationary points in the O<sub>2</sub> attack on 2OG for conformation B of L-Arg and in-line 2OG bound to EFE with an ExtEF of -0.010 au along the Fe-O bond.

| Spin Density       | FE   | Op    | Od    | CO2  | 2OG-CO2 | L-ARG | D191 | H189 | H268 |
|--------------------|------|-------|-------|------|---------|-------|------|------|------|
| <b>BI-RC-0.010</b> | 4.24 | -0.56 | -0.25 | 0.21 | 0.05    | 0.00  | 0.12 | 0.06 | 0.12 |
| <b>BI-TS-0.010</b> | 4.23 | -0.31 | -0.54 | 0.12 | 0.18    | 0.00  | 0.07 | 0.05 | 0.17 |
| <b>BI-IM-0.010</b> | 3.81 | 0.01  | 0.06  | 0.00 | 0.00    | 0.00  | 0.03 | 0.02 | 0.03 |

**Table S49.** Mulliken charges of stationary points in the O<sub>2</sub> attack on 2OG for conformation B of L-Arg and in-line 2OG bound to EFE with an ExtEF of -0.010 au along the Fe-O bond.

| Charge Distribution | FE   | Op    | Od    | CO2   | 2OG-CO2 | L-ARG | D191  | H189 | H268 |
|---------------------|------|-------|-------|-------|---------|-------|-------|------|------|
| <b>BI-RC-0.010</b>  | 0.95 | -0.22 | -0.33 | -0.34 | -1.01   | 0.75  | -0.42 | 0.26 | 0.36 |
| <b>BI-TS-0.010</b>  | 0.94 | -0.24 | -0.19 | -0.34 | -1.13   | 0.75  | -0.45 | 0.26 | 0.40 |
| <b>BI-IM-0.010</b>  | 0.83 | -0.19 | -0.50 | 0.02  | -0.89   | 0.74  | -0.49 | 0.21 | 0.27 |

**Table S50.** The occupation numbers of the Fe-O bonding natural orbitals in off-line 2OG with L-Arg conformation A and B under varying ExtEF conditions.

| ExtEF (au)          | Fe-based natural orbital & occupation number | O <sub>2</sub> -based natural orbital & occupation number |
|---------------------|----------------------------------------------|-----------------------------------------------------------|
| <b>AO-RC+0.0025</b> | $d_{xz} + \pi^*_{\perp}$ (1.22)              | $d_{xz} - \pi^*_{\perp}$ (0.78)                           |
| <b>AO-RC+0.0050</b> | $d_{xz} + \pi^*_{\perp}$ (1.23)              | $d_{xz} - \pi^*_{\perp}$ (0.77)                           |
| <b>AO-RC+0.0075</b> | $d_{xz} + \pi^*_{\perp}$ (1.36)              | $d_{xz} - \pi^*_{\perp}$ (0.64)                           |
| <b>AO-RC+0.010</b>  | $d_{xz} + \pi^*_{\perp}$ (1.35)              | $d_{xz} - \pi^*_{\perp}$ (0.65)                           |
|                     |                                              |                                                           |
| <b>AO-RC-0.0025</b> | $d_{xz} + \pi^*_{\perp}$ (1.18)              | $d_{xz} - \pi^*_{\perp}$ (0.82)                           |
| <b>AO-RC-0.0050</b> | $d_{xz} + \pi^*_{\perp}$ (1.17)              | $d_{xz} - \pi^*_{\perp}$ (0.83)                           |
| <b>AO-RC-0.0075</b> | $d_{xz} + \pi^*_{\perp}$ (1.15)              | $d_{xz} - \pi^*_{\perp}$ (0.85)                           |
| <b>AO-RC-0.010</b>  | $d_{xz} + \pi^*_{\perp}$ (1.13)              | $d_{xz} - \pi^*_{\perp}$ (0.87)                           |

|                     |                                   |                                   |
|---------------------|-----------------------------------|-----------------------------------|
| <b>BO-RC+0.0025</b> | $d_{x^2-y^2} + \pi^*_{  }$ (1.22) | $d_{x^2-y^2} - \pi^*_{  }$ (0.78) |
| <b>BO-RC+0.0050</b> | $d_{x^2-y^2} + \pi^*_{  }$ (1.26) | $d_{x^2-y^2} - \pi^*_{  }$ (0.74) |
| <b>BO-RC+0.0075</b> | $d_{xz} + \pi^*_{\perp}$ (1.34)   | $d_{xz} - \pi^*_{\perp}$ (0.66)   |
| <b>BO-RC+0.010</b>  | $d_{xz} + \pi^*_{\perp}$ (1.32)   | $d_{xz} - \pi^*_{\perp}$ (0.68)   |
|                     |                                   |                                   |
| <b>BO-RC-0.0025</b> | $d_{x^2-y^2} + \pi^*_{  }$ (1.21) | $d_{x^2-y^2} - \pi^*_{  }$ (0.79) |
| <b>BO-RC-0.0050</b> | $d_{x^2-y^2} + \pi^*_{  }$ (1.19) | $d_{x^2-y^2} - \pi^*_{  }$ (0.81) |
| <b>BO-RC-0.0075</b> | $d_{xz} + \pi^*_{\perp}$ (0.30)   | $d_{xz} - \pi^*_{\perp}$ (1.70)   |
| <b>BO-RC-0.010</b>  | $d_{xz} + \pi^*_{\perp}$ (0.20)   | $d_{xz} - \pi^*_{\perp}$ (1.80)   |

**Table S51.** Ethylene and P5C production by selected EFE variants described in the text compared to the WT enzyme. The assays were carried out in 2 mL reactions consisting of 0.5 mM 2OG, 0.5 mM L-Arg, 0.2 mM Fe(II), 0.4 mM L-ascorbic acid, and 1  $\mu$ M EFE in 25 mM HEPES, pH 7.5. The samples were incubated at 25 °C for 80 min and terminated with 100  $\mu$ L of 3.6 M HCl. Standard error of the mean is given in *parentheses*. N = two or greater. ND, not detected.

| Sample | Ethylene (% vs WT) | P5C (% vs WT)      | Reference  |
|--------|--------------------|--------------------|------------|
| E84A   | ND                 | 3.8 ( $\pm$ 0.7)   | [Ref. 1]   |
| D91A   | ND                 | ND                 | This study |
| R171A  | ND                 | 3.2 ( $\pm$ 1.7)   | [Ref. 1]   |
| R184A  | 76.5 ( $\pm$ 6.9)  | 77.6 ( $\pm$ 9.4)  | [Ref. 1]   |
| D253A  | 0.3 ( $\pm$ 0.1)   | ND                 | This study |
| K269A  | 94.8 ( $\pm$ 12.7) | 91.9 ( $\pm$ 10.9) | This study |
| E285A  | 0.2 ( $\pm$ 0.2)   | 9.0 ( $\pm$ 4.1)   | [Ref. 1]   |

**AO-RC+0.0025**

1 C 41.8893920 28.4300325 29.9172203  
2 H 40.8811875 28.8349910 29.7519956  
3 H 41.8123956 27.3379204 29.7911616  
4 C 42.3104145 28.7989521 31.3055500  
5 N 43.3857109 28.2695408 31.9981845  
6 H 44.0501834 27.5612010 31.6685902  
7 C 43.4633529 28.8839242 33.1964061  
8 H 44.2389842 28.6811546 33.9316813  
9 N 42.4917165 29.7742674 33.3286432  
10 C 41.7620754 29.7261980 32.1604442  
11 H 40.9143704 30.3830247 31.9928005  
12 C 40.1630731 34.3559415 32.3775172  
13 H 41.1924408 34.4973371 32.0282880  
14 H 39.8594898 35.2753968 32.9024161  
15 C 40.0436790 33.1801166 33.3497732  
16 O 38.9741810 32.9897044 33.9334406  
17 O 41.0947901 32.4389304 33.4545071  
18 C 47.4039475 32.1387099 31.6008286  
19 H 48.0925356 31.9064790 32.4257136

20 H 47.7521533 33.0839677 31.1522702  
21 C 46.0077392 32.2886084 32.1141553  
22 N 45.0204236 32.9594314 31.4192106  
23 H 45.1389708 33.4464060 30.5236781  
24 C 43.8736013 32.8725172 32.1155318  
25 H 42.9234409 33.2790101 31.7829299  
26 N 44.0635026 32.2048009 33.2440964  
27 C 45.3928629 31.8382731 33.2622240  
28 H 45.8167400 31.2868966 34.0983286  
29 Fe 42.4377849 31.5766167 34.5429112  
30 O 42.7592407 33.2700181 35.6875833  
31 O 42.8929346 33.1714211 36.9436648  
32 C 41.9368905 30.7088769 37.1974482  
33 O 41.3295787 30.8664250 36.0746048  
34 O 41.4209601 30.4235690 38.2761548  
35 C 43.4730034 30.8653514 37.0732266  
36 O 43.9131900 30.8550342 35.9061759  
37 C 44.3390819 30.8226171 38.2844901  
38 C 45.6628582 31.5777836 38.1748189  
39 C 46.7803134 31.0389610 39.1023091

40 O 47.7615528 31.8044926 39.2683045  
41 O 46.6402877 29.8779376 39.5628671  
42 H 46.0487049 31.4951300 37.1441290  
43 H 45.5295922 32.6544339 38.3614111  
44 H 43.7357022 31.1306857 39.1509082  
45 H 44.5927144 29.7592661 38.4766887  
46 N 38.0811541 26.0776320 32.6441386  
47 C 36.7514919 26.7306373 32.8367694  
48 C 35.8964533 26.4917876 31.5591015  
49 O 36.5263774 26.0634551 30.5469382  
50 C 36.9010078 28.2256889 33.1631269  
51 C 37.8844277 28.5501513 34.3016106  
52 C 37.8654128 30.0107219 34.7538725  
53 N 36.5967256 30.2990958 35.4135769  
54 C 36.2418769 31.4309019 36.0355551  
55 N 35.0793739 31.4273581 36.7029065  
56 N 37.0234283 32.5123387 36.0225516  
57 O 34.6885036 26.7644250 31.6368435  
58 H 36.2726459 26.2111576 33.6812381  
59 H 37.1974256 28.7753798 32.2534866  
60 H 35.8871918 28.5709580 33.4128161  
61 H 37.6859479 27.9053299 35.1765734  
62 H 38.9175999 28.3286780 33.9905314  
63 H 38.7086783 30.1956585 35.4418494  
64 H 38.0121781 30.6897066 33.8976353  
65 H 35.9293789 29.5321497 35.5344026  
66 H 34.5014993 30.5885359 36.6824781  
67 H 34.7334922 32.2878105 37.1302066  
68 H 37.8290385 32.5956895 35.3909829  
69 H 36.7258910 33.3486165 36.5210379  
70 H 37.9653223 25.0591801 32.4999179  
71 H 38.5549541 26.4571044 31.8084950  
72 H 38.7083882 26.1653296 33.4730547  
73 H 39.5166747 34.1876472 31.5161734  
74 H 47.5381477 31.3900105 30.8201195  
75 H 42.5439014 28.7845697 29.1209867

**AO-TS+0.0025**

1 C 41.8816909 28.4430024 29.9286085  
2 H 40.8734940 28.8418894 29.7483343  
3 H 41.8088943 27.3493854 29.8131763  
4 C 42.2862320 28.8247217 31.3189994  
5 N 43.3546331 28.2978678 32.0261898  
6 H 44.0214351 27.5881890 31.7036569  
7 C 43.4170676 28.9166742 33.2238141  
8 H 44.1774778 28.7206441 33.9769147  
9 N 42.4442623 29.8084438 33.3397907  
10 C 41.7296349 29.7583729 32.1630956  
11 H 40.8815596 30.4129300 31.9882601  
12 C 40.1754005 34.3516376 32.3954546  
13 H 41.2047021 34.4926170 32.0454948  
14 H 39.8725937 35.2750545 32.9138522  
15 C 40.0639490 33.1832176 33.3802702  
16 O 38.9845935 32.9751480 33.9434247  
17 O 41.1304517 32.4761702 33.5221233  
18 C 47.4188959 32.1412947 31.5869078  
19 H 48.1026288 31.9052261 32.4146896  
20 H 47.7758564 33.0828669 31.1375023

21 C 46.0218350 32.2962804 32.0962728  
22 N 45.0358019 32.9685457 31.4012011  
23 H 45.1560878 33.4589276 30.5078837  
24 C 43.8873528 32.8805299 32.0947651  
25 H 42.9394062 33.2909812 31.7605582  
26 N 44.0760697 32.2097241 33.2211247  
27 C 45.4046049 31.8432322 33.2415526  
28 H 45.8269064 31.2856485 34.0742801  
29 Fe 42.5083051 31.5955086 34.5678303  
30 O 42.7349247 33.0890904 35.8427353  
31 O 43.1178706 32.6447891 37.0806991  
32 C 41.7820710 30.7212745 37.2645545  
33 O 41.2254669 30.7747474 36.1574192  
34 O 41.4396399 30.4230022 38.3921086  
35 C 43.4744394 31.2710304 37.0617764  
36 O 43.8055275 30.8149071 35.8887305  
37 C 44.3302128 30.9508416 38.2768042  
38 C 45.7029311 31.6229202 38.1802942  
39 C 46.7951873 31.0578873 39.1192338  
40 O 47.7912631 31.8083287 39.2761514  
41 O 46.6323801 29.9068822 39.5891399  
42 H 46.0905125 31.4929968 37.1545606  
43 H 45.6272974 32.7089413 38.3417413  
44 H 43.7861921 31.2608714 39.1812101  
45 H 44.4602889 29.8611174 38.3381269  
46 N 38.0810394 26.0772668 32.6455965  
47 C 36.7508037 26.7300052 32.8341239  
48 C 35.8978272 26.4901096 31.5554668  
49 O 36.5282292 26.0581582 30.5455220  
50 C 36.8991367 28.2252201 33.1602255  
51 C 37.8818186 28.5489285 34.2989669  
52 C 37.8640452 30.0094977 34.7501197  
53 N 36.5975250 30.2990586 35.4129436  
54 C 36.2450985 31.4325270 36.0332716  
55 N 35.0850522 31.4303890 36.7052675  
56 N 37.0292430 32.5121652 36.0180974  
57 O 34.6904130 26.7661248 31.6309800  
58 H 36.2705969 26.2111537 33.6782449  
59 H 37.1960830 28.7755485 32.2512376  
60 H 35.8852526 28.5702819 33.4095947  
61 H 37.6815957 27.9044688 35.1738453  
62 H 38.9149092 28.3260051 33.9888878  
63 H 38.7081155 30.1928897 35.4370246  
64 H 38.0112343 30.6888540 33.8943693  
65 H 35.9289734 29.5330709 35.5341177  
66 H 34.5033731 30.5942599 36.6811126  
67 H 34.7374957 32.2936183 37.1254988  
68 H 37.8274210 32.5981753 35.3757136  
69 H 36.7287109 33.3515858 36.5097198  
70 H 37.9669033 25.0585771 32.5014295  
71 H 38.5570991 26.4569659 31.8113310  
72 H 38.7056199 26.1654983 33.4764256  
73 H 39.5284872 34.1846469 31.5342435  
74 H 47.5495144 31.3894522 30.8086156  
75 H 42.5393262 28.7895127 29.1314175

**AO-IM+0.0025**

1 C 41.9087404 28.3770595 29.8687346



2 H 40.8891403 28.7588579 29.7176869  
3 H 41.8553815 27.2838242 29.7454067  
4 C 42.3547230 28.7678590 31.2422237  
5 N 43.4476020 28.2522068 31.9154836  
6 H 44.0934574 27.5243626 31.5937399  
7 C 43.5879187 28.9240447 33.0761587  
8 H 44.3836002 28.7362541 33.7931399  
9 N 42.6390045 29.8368393 33.1961408  
10 C 41.8562272 29.7457966 32.0699317  
11 H 41.0092707 30.4054495 31.9110679  
12 C 40.0929819 34.4281120 32.4237142  
13 H 41.0629638 34.7767875 32.0475172  
14 H 39.6660676 35.2350716 33.0401347  
15 C 40.2234933 33.1846676 33.3057276  
16 O 39.2588845 32.8024764 33.9664411  
17 O 41.3862411 32.6145122 33.2639318  
18 C 47.4674522 32.1236441 31.5957519  
19 H 48.1636734 31.8716104 32.4078243  
20 H 47.8306442 33.0626987 31.1459551  
21 C 46.0847984 32.3075737 32.1323319  
22 N 45.1065123 33.0052979 31.4501175  
23 H 45.2236648 33.4878467 30.5518829  
24 C 43.9718519 32.9642476 32.1674911  
25 H 43.0256555 33.3916440 31.8526804  
26 N 44.1570341 32.2971551 33.2992036  
27 C 45.4752905 31.8862202 33.2942085  
28 H 45.8953177 31.3221102 34.1237652  
29 Fe 42.4681521 31.5284987 34.4896818  
30 O 41.4856565 32.4340179 36.0533502  
31 O 42.7973450 31.8813479 37.6941558  
32 C 40.7085815 31.3447229 36.2469988  
33 O 41.0242322 30.3985639 35.4185646  
34 O 39.8295378 31.2929921 37.0983911  
35 C 43.7675638 31.2977435 37.1427580  
36 O 43.9058250 31.0960219 35.9006681  
37 C 44.8368201 30.8350267 38.1135057  
38 C 46.0085011 31.8136630 38.1749110  
39 C 47.1766346 31.2422941 39.0134167  
40 O 48.1560937 32.0047994 39.1786335  
41 O 47.0439725 30.0688311 39.4345016  
42 H 46.3861837 32.0420500 37.1644660  
43 H 45.7011156 32.7778839 38.6113197  
44 H 44.3964135 30.7104005 39.1116893  
45 H 45.1899959 29.8515881 37.7767730  
46 N 38.0301987 26.0693587 32.5880524  
47 C 36.6878483 26.6991119 32.7713020  
48 C 35.8420422 26.4505289 31.4928161  
49 O 36.4798153 26.0329667 30.4811170  
50 C 36.8138042 28.1960690 33.0907748  
51 C 37.7735920 28.5318196 34.2420215  
52 C 37.7514782 29.9942065 34.6757520  
53 N 36.4755045 30.3056748 35.3093934  
54 C 36.1513751 31.4314816 35.9562704  
55 N 34.9863637 31.4421332 36.6199357  
56 N 36.9488721 32.5010510 35.9476449  
57 O 34.6307771 26.7117815 31.5675378  
58 H 36.2139352 26.1759800 33.6162719  
59 H 37.1198559 28.7437960 32.1831485

60 H 35.7931064 28.5340841 33.3214707  
61 H 37.5552970 27.8961766 35.1192391  
62 H 38.8145143 28.3102255 33.9587690  
63 H 38.5723036 30.1693568 35.3839375  
64 H 37.9278210 30.6627203 33.8163863  
65 H 35.7969063 29.5492978 35.4311691  
66 H 34.3891631 30.6173184 36.5747119  
67 H 34.6546240 32.3005991 37.0608028  
68 H 37.8351485 32.5165159 35.4384212  
69 H 36.7176601 33.3143299 36.5132458  
70 H 37.9341371 25.0491035 32.4459062  
71 H 38.5052710 26.4592729 31.7573784  
72 H 38.6477541 26.1684150 33.4232559  
73 H 39.4501791 34.2176740 31.5689700  
74 H 47.5753576 31.3777269 30.8083313  
75 H 42.5527694 28.7523693 29.0734760

**AO-RC+0.0050**

1 C 41.9050535 28.4403665 29.9121272  
2 H 40.8942780 28.8372016 29.7414710  
3 H 41.8376486 27.3472516 29.7844471  
4 C 42.3153104 28.8129187 31.3027748  
5 N 43.3918026 28.2913178 31.9995496  
6 H 44.0667344 27.5940520 31.6706094  
7 C 43.4585939 28.9090804 33.1983199  
8 H 44.2332075 28.7155238 33.9374038  
9 N 42.4810180 29.7909043 33.3251388  
10 C 41.7576048 29.7378459 32.1546951  
11 H 40.9106664 30.3952387 31.9821339  
12 C 40.1205651 34.3628067 32.3655388  
13 H 41.1489974 34.5241887 32.0215918  
14 H 39.7973194 35.2759628 32.8898938  
15 C 40.0144806 33.1791354 33.3293231  
16 O 38.9431327 32.9710778 33.9069161  
17 O 41.0698975 32.4459160 33.4284245  
18 C 47.3977051 32.1609965 31.6295939  
19 H 48.0816294 31.9222570 32.4566468  
20 H 47.7519843 33.1084832 31.1907682  
21 C 45.9994163 32.3133445 32.1376231  
22 N 45.0218920 33.0053007 31.4492782  
23 H 45.1507048 33.5105871 30.5652273  
24 C 43.8714438 32.9196993 32.1402363  
25 H 42.9282499 33.3467918 31.8135006  
26 N 44.0487334 32.2295050 33.2570665  
27 C 45.3745499 31.8499785 33.2750284  
28 H 45.7908798 31.2868226 34.1071935  
29 Fe 42.4129737 31.6064805 34.5482780  
30 O 42.7353961 33.2770114 35.6943401  
31 O 42.8296482 33.2011438 36.9492395  
32 C 41.9000491 30.6838601 37.1877685  
33 O 41.3001752 30.8659265 36.0648814  
34 O 41.3785849 30.3820823 38.2584559  
35 C 43.4413843 30.8239639 37.0787185  
36 O 43.8871815 30.8459247 35.9165374  
37 C 44.2937461 30.7665614 38.2961198  
38 C 45.6110505 31.5366199 38.1129566  
39 C 46.7357998 30.9660947 39.1129647  
40 O 47.7208958 31.7228946 39.2770724

41 O 46.5939852 29.7959053 39.5524173  
 42 H 45.9957712 31.5052462 37.1792133  
 43 H 45.4705663 32.6019871 38.4509398  
 44 H 43.6788822 31.0504756 39.1625952  
 45 H 44.5626592 29.7033532 38.4735078  
 46 N 38.0918382 26.1183784 32.6190361  
 47 C 36.7481971 26.7449271 32.8060452  
 48 C 35.8976216 26.4740637 31.5325956  
 49 O 36.5298789 26.0359421 30.5240686  
 50 C 36.8753743 28.2428512 33.1331705  
 51 C 37.8563164 28.5738309 34.2737511  
 52 C 37.8399788 30.0356169 34.7250430  
 53 N 36.5708745 30.3320637 35.3787506  
 54 C 36.2290293 31.4606608 36.0202227  
 55 N 35.0719621 31.4526116 36.6963265  
 56 N 37.0126341 32.5378337 36.0120236  
 57 O 34.6836058 26.7227371 31.6054183  
 58 H 36.2805923 26.2206449 33.6540870  
 59 H 37.1643893 28.7976896 32.2239903  
 60 H 35.8583526 28.5753766 33.3861385  
 61 H 37.6555372 27.9290617 35.1484282  
 62 H 38.8905727 28.3529287 33.9649350  
 63 H 38.6832125 30.2146882 35.4148463  
 64 H 37.9976256 30.7138844 33.8704177  
 65 H 35.9033612 29.5667682 35.5050356  
 66 H 34.4927827 30.6162331 36.6807751  
 67 H 34.7352913 32.3095762 37.1398765  
 68 H 37.8167504 32.6244196 35.3780360  
 69 H 36.7316401 33.3664069 36.5348650  
 70 H 37.9979285 25.1030207 32.4523014  
 71 H 38.5749299 26.5253505 31.8006622  
 72 H 38.7014642 26.2000974 33.4622662  
 73 H 39.4819432 34.1813901 31.5010637  
 74 H 47.5324388 31.4170530 30.8444429  
 75 H 42.5605151 28.8007922 29.1193280

**AO-TS+0.0050**

1 C 41.8992345 28.4371036 29.8936105  
 2 H 40.8879364 28.8278018 29.7130076  
 3 H 41.8395700 27.3433483 29.7698130  
 4 C 42.2971158 28.8176633 31.2854734  
 5 N 43.3643787 28.2936770 31.9968331  
 6 H 44.0368755 27.5889499 31.6772200  
 7 C 43.4266549 28.9174279 33.1907949  
 8 H 44.1882255 28.7301481 33.9452074  
 9 N 42.4522197 29.8076426 33.2978272  
 10 C 41.7383798 29.7544452 32.1230699  
 11 H 40.8943783 30.4127111 31.9419631  
 12 C 40.1484129 34.3635799 32.3891285  
 13 H 41.1713357 34.5434810 32.0378182  
 14 H 39.8167419 35.2753579 32.9115817  
 15 C 40.0768406 33.1911676 33.3734914  
 16 O 38.9994474 32.9291267 33.9164688  
 17 O 41.1785319 32.5430311 33.5419660  
 18 C 47.4084419 32.1614633 31.6297009  
 19 H 48.0957337 31.9221252 32.4537039  
 20 H 47.7628032 33.1072673 31.1874575  
 21 C 46.0132021 32.3170173 32.1439666

22 N 45.0331782 33.0083737 31.4569987  
 23 H 45.1597564 33.5134341 30.5724919  
 24 C 43.8849998 32.9247442 32.1508562  
 25 H 42.9409374 33.3538467 31.8301355  
 26 N 44.0671055 32.2361041 33.2676915  
 27 C 45.3925413 31.8564860 33.2845613  
 28 H 45.8064527 31.2958210 34.1199561  
 29 Fe 42.4891143 31.5284556 34.5699318  
 30 O 42.7866351 33.2025228 35.9585828  
 31 O 43.1728988 32.6984745 37.1312737  
 32 C 41.8382496 30.7648125 37.1990439  
 33 O 41.2363274 30.8704799 36.0704206  
 34 O 41.3717301 30.3762844 38.2611906  
 35 C 43.3596459 31.2547482 37.0783776  
 36 O 43.7890456 30.8909926 35.8528423  
 37 C 44.2633151 30.9021689 38.2546048  
 38 C 45.6333177 31.5729485 38.1714727  
 39 C 46.7303200 30.9870175 39.0917324  
 40 O 47.7313810 31.7277262 39.2515277  
 41 O 46.5652777 29.8295449 39.5517546  
 42 H 46.0186659 31.4846366 37.1399423  
 43 H 45.5633303 32.6527277 38.3744367  
 44 H 43.7332435 31.1651332 39.1834953  
 45 H 44.3922969 29.8104541 38.2708966  
 46 N 38.0907410 26.1120320 32.6233980  
 47 C 36.7478573 26.7401869 32.8101121  
 48 C 35.8983781 26.4724977 31.5354891  
 49 O 36.5317226 26.0364496 30.5266443  
 50 C 36.8768568 28.2374736 33.1388443  
 51 C 37.8581417 28.5654431 34.2797900  
 52 C 37.8452508 30.0268716 34.7312804  
 53 N 36.5775446 30.3253346 35.3865772  
 54 C 36.2359416 31.4572805 36.0213897  
 55 N 35.0758401 31.4556823 36.6919335  
 56 N 37.0229494 32.5325282 36.0110144  
 57 O 34.6845412 26.7219668 31.6075718  
 58 H 36.2790058 26.2156256 33.6572573  
 59 H 37.1667470 28.7929870 32.2302895  
 60 H 35.8603293 28.5713332 33.3921097  
 61 H 37.6558378 27.9209329 35.1542888  
 62 H 38.8919932 28.3420792 33.9715466  
 63 H 38.6903880 30.2043108 35.4191350  
 64 H 38.0019511 30.7047513 33.8760836  
 65 H 35.9081301 29.5617180 35.5134186  
 66 H 34.4942402 30.6209248 36.6765677  
 67 H 34.7411061 32.3134983 37.1353734  
 68 H 37.8376063 32.6081462 35.3899748  
 69 H 36.7434906 33.3645111 36.5290799  
 70 H 37.9956156 25.0965117 32.4578187  
 71 H 38.5738071 26.5174082 31.8044568  
 72 H 38.7011304 26.1940981 33.4661061  
 73 H 39.5070705 34.1766057 31.5278575  
 74 H 47.5369018 31.4159039 30.8450313  
 75 H 42.5602025 28.8002770 29.1066585

**AO-IM+0.0050**

1 C 41.9028465 28.3912351 29.8687148  
 2 H 40.8856504 28.7765664 29.7081226

3 H 41.8481447 27.2994080 29.7265516  
4 C 42.3243834 28.7533354 31.2578285  
5 N 43.4261634 28.2448504 31.9211066  
6 H 44.1040257 27.5594949 31.5763566  
7 C 43.5226664 28.8650722 33.1165118  
8 H 44.3206660 28.6757541 33.8312900  
9 N 42.5385106 29.7307013 33.2745770  
10 C 41.7793557 29.6691720 32.1287627  
11 H 40.9165444 30.3140644 31.9807677  
12 C 40.0551690 34.5039045 32.3830024  
13 H 41.0403575 34.8064383 32.0057706  
14 H 39.6382680 35.3585786 32.9403373  
15 C 40.1381465 33.3062123 33.3351726  
16 O 39.1087184 32.9488481 33.9282872  
17 O 41.2942622 32.7652932 33.4227457  
18 C 47.4380914 32.1297113 31.6418248  
19 H 48.1341925 31.8730857 32.4531348  
20 H 47.7960141 33.0779542 31.2074619  
21 C 46.0529741 32.2953978 32.1796135  
22 N 45.0786132 33.0270899 31.5312877  
23 H 45.1948962 33.5387560 30.6493196  
24 C 43.9477916 32.9694620 32.2618731  
25 H 43.0062573 33.4301518 31.9793062  
26 N 44.1297108 32.2541902 33.3628577  
27 C 45.4426855 31.8313125 33.3261420  
28 H 45.8741351 31.2315726 34.1253830  
29 Fe 42.3784020 31.4815109 34.4834481  
30 O 41.8110858 32.3052312 36.5423743  
31 O 42.8002551 32.2701820 37.5729391  
32 C 40.8693153 31.1535443 36.7472262  
33 O 40.6598398 30.6534025 35.6326113  
34 O 40.5336289 30.9165374 37.8871419  
35 C 43.7479463 31.3591659 37.2629838  
36 O 43.7413731 30.7568169 36.1961611  
37 C 44.7318892 31.2157652 38.3696221  
38 C 46.1167955 31.7583252 38.0102312  
39 C 47.1993716 31.1902942 38.9607697  
40 O 48.2063930 31.9124340 39.1219908  
41 O 46.9813704 30.0498719 39.4393352  
42 H 46.3817077 31.4368256 36.9876175  
43 H 46.1520414 32.8572841 38.0289260  
44 H 44.3380031 31.6991135 39.2750154  
45 H 44.8617094 30.1407298 38.5793832  
46 N 38.0183622 26.0849512 32.5601013  
47 C 36.6628239 26.6924730 32.7195863  
48 C 35.8224327 26.3822644 31.4541291  
49 O 36.4687509 25.9639671 30.4463577  
50 C 36.7591307 28.2056768 32.9713845  
51 C 37.7967317 28.6307754 34.0217798  
52 C 37.7263929 30.1103971 34.3935356  
53 N 36.5405232 30.3583194 35.2037433  
54 C 36.2574568 31.4646541 35.9048786  
55 N 35.1479041 31.4401404 36.6590471  
56 N 37.0520202 32.5339479 35.8762535  
57 O 34.6027499 26.6055596 31.5262739  
58 H 36.2029613 26.1961175 33.5879441  
59 H 36.9726355 28.7236277 32.0212726  
60 H 35.7493282 28.5220788 33.2689972

61 H 37.6909285 28.0280039 34.9410780  
62 H 38.8165868 28.4432971 33.6487865  
63 H 38.6344157 30.3838936 34.9498792  
64 H 37.7153388 30.7396885 33.4861285  
65 H 35.8594443 29.6036223 35.3207608  
66 H 34.5414203 30.6240811 36.6103544  
67 H 34.8183236 32.2933462 37.1152688  
68 H 37.8496346 32.6189230 35.2287988  
69 H 36.8265602 33.3467734 36.4463819  
70 H 37.9428502 25.0645827 32.4160266  
71 H 38.5068270 26.4838929 31.7405183  
72 H 38.6150976 26.1930034 33.4100202  
73 H 39.4194029 34.2534718 31.5337957  
74 H 47.5545890 31.3945111 30.8455987  
75 H 42.5569223 28.7726883 29.0846578

**AO-RC+0.0075**

1 C 41.9148419 28.4521307 29.9089062  
2 H 40.9032866 28.8440816 29.7302204  
3 H 41.8529736 27.3581545 29.7781033  
4 C 42.3120388 28.8257156 31.3033956  
5 N 43.3951708 28.3158109 31.9988387  
6 H 44.0830600 27.6343719 31.6673535  
7 C 43.4510257 28.9356323 33.1989473  
8 H 44.2310607 28.7514211 33.9352698  
9 N 42.4623780 29.8018149 33.3286090  
10 C 41.7415683 29.7417453 32.1581833  
11 H 40.8967431 30.4030084 31.9860873  
12 C 40.1066358 34.3838417 32.3473786  
13 H 41.1259712 34.5940750 31.9994166  
14 H 39.7526151 35.2712405 32.8953164  
15 C 40.0450407 33.1639485 33.2743278  
16 O 38.9761584 32.9360643 33.8677639  
17 O 41.0943362 32.4371620 33.3152594  
18 C 47.4188978 32.1794446 31.6499935  
19 H 48.1082297 31.9362401 32.4715667  
20 H 47.7746935 33.1272485 31.2130896  
21 C 46.0251773 32.3361419 32.1687507  
22 N 45.0485330 33.0423171 31.4948786  
23 H 45.1747855 33.5563952 30.6157124  
24 C 43.9031684 32.9617141 32.1976477  
25 H 42.9588286 33.3970338 31.8846797  
26 N 44.0817573 32.2586574 33.3055525  
27 C 45.4040788 31.8669237 33.3065049  
28 H 45.8270234 31.2969708 34.1311887  
29 Fe 42.4258207 31.6084233 34.5630860  
30 O 42.5375896 33.4954955 35.5076483  
31 O 42.5453570 33.6828159 36.7120904  
32 C 41.8877897 30.6860577 37.2556179  
33 O 41.3227217 30.9196276 36.1348567  
34 O 41.3500210 30.3378970 38.3056339  
35 C 43.4430956 30.8333280 37.2095379  
36 O 43.9267385 30.9747056 36.0815236  
37 C 44.2351484 30.7562275 38.4594441  
38 C 45.5030250 31.6140761 38.4872410  
39 C 46.6934822 30.9339129 39.2082881  
40 O 47.7078427 31.6528650 39.3315593  
41 O 46.5581597 29.7343592 39.5683538

42 H 45.8438200 31.8354039 37.4628776  
43 H 45.3210138 32.5896219 38.9650642  
44 H 43.5627619 30.9293922 39.3115401  
45 H 44.5923765 29.7077716 38.5851065  
46 N 38.1208515 26.1405999 32.5827476  
47 C 36.7679282 26.7478133 32.7716928  
48 C 35.9105336 26.4450415 31.5108808  
49 O 36.5363879 25.9977850 30.5002825  
50 C 36.8841555 28.2484843 33.0942588  
51 C 37.8745709 28.5787855 34.2284887  
52 C 37.8734983 30.0388474 34.6862169  
53 N 36.6052017 30.3499276 35.3335206  
54 C 36.2844744 31.4848969 35.9812759  
55 N 35.1382248 31.4845457 36.6753547  
56 N 37.0748696 32.5533653 35.9533421  
57 O 34.6918835 26.6694568 31.5910113  
58 H 36.3158984 26.2244708 33.6288335  
59 H 37.1615710 28.8049954 32.1822310  
60 H 35.8683043 28.5749548 33.3588559  
61 H 37.6745138 27.9319259 35.1020743  
62 H 38.9059565 28.3542385 33.9118171  
63 H 38.7158700 30.1999544 35.3819489  
64 H 38.0518224 30.7231886 33.8407516  
65 H 35.9410773 29.5862695 35.4829531  
66 H 34.5560623 30.6519104 36.6778883  
67 H 34.8117462 32.3426884 37.1267114  
68 H 37.8727386 32.6328553 35.3047914  
69 H 36.8199085 33.3844226 36.4866077  
70 H 38.0425871 25.1295912 32.3951698  
71 H 38.6092009 26.5693288 31.7773555  
72 H 38.7185416 26.2139303 33.4358141  
73 H 39.4718321 34.1932283 31.4820706  
74 H 47.5436439 31.4379916 30.8608465  
75 H 42.5737079 28.8157340 29.1203915

**AO-TS+0.0075**

1 C 41.9162205 28.4616706 29.9050220  
2 H 40.9033942 28.8448517 29.7156817  
3 H 41.8641782 27.3664687 29.7850480  
4 C 42.3039943 28.8518221 31.2975706  
5 N 43.3648955 28.3276650 32.0182792  
6 H 44.0380106 27.6225249 31.7040513  
7 C 43.4228847 28.9621359 33.2084841  
8 H 44.1779085 28.7796152 33.9709512  
9 N 42.4537803 29.8568671 33.3022459  
10 C 41.7468382 29.7993488 32.1250411  
11 H 40.9110607 30.4660968 31.9353739  
12 C 40.1531408 34.4025793 32.3934130  
13 H 41.1737130 34.6046152 32.0471357  
14 H 39.8002330 35.3066274 32.9154950  
15 C 40.0960810 33.2224434 33.3681908  
16 O 39.0192391 32.9345001 33.9014564  
17 O 41.2050067 32.5874551 33.5323794  
18 C 47.4305751 32.1840633 31.6585627  
19 H 48.1186604 31.9367717 32.4796607  
20 H 47.7914215 33.1294883 31.2210798  
21 C 46.0381892 32.3492043 32.1771781  
22 N 45.0675877 33.0650770 31.5018002

23 H 45.2001390 33.5834032 30.6257666  
24 C 43.9193345 32.9881016 32.1961286  
25 H 42.9822006 33.4395576 31.8860961  
26 N 44.0916166 32.2769489 33.3002735  
27 C 45.4116967 31.8788889 33.3106263  
28 H 45.8193004 31.3049224 34.1402808  
29 Fe 42.4995532 31.5840162 34.5942463  
30 O 42.7934038 33.2108854 35.9846308  
31 O 43.1584729 32.6836352 37.1623511  
32 C 41.8052563 30.7623643 37.1906649  
33 O 41.2141063 30.8986227 36.0566981  
34 O 41.3241718 30.3521369 38.2372031  
35 C 43.3289859 31.2402663 37.0970094  
36 O 43.7704880 30.8838599 35.8718593  
37 C 44.2167384 30.8729919 38.2784759  
38 C 45.5938085 31.5286050 38.2022176  
39 C 46.6921787 30.9099433 39.0971467  
40 O 47.7131624 31.6243326 39.2300760  
41 O 46.5110435 29.7562460 39.5629933  
42 H 45.9737258 31.4630097 37.1669089  
43 H 45.5400414 32.6034991 38.4349356  
44 H 43.6860107 31.1428636 39.2046392  
45 H 44.3291377 29.7783006 38.2893863  
46 N 38.1164927 26.1371164 32.5999595  
47 C 36.7642880 26.7456290 32.7888393  
48 C 35.9105447 26.4491006 31.5234288  
49 O 36.5400033 26.0062869 30.5130816  
50 C 36.8797827 28.2451811 33.1175046  
51 C 37.8666478 28.5758901 34.2551820  
52 C 37.8644099 30.0374582 34.7102338  
53 N 36.6016775 30.3450714 35.3694469  
54 C 36.2743762 31.4788420 36.0149291  
55 N 35.1165264 31.4812744 36.6885805  
56 N 37.0675296 32.5468627 36.0050661  
57 O 34.6919719 26.6738386 31.6002744  
58 H 36.3092414 26.2189631 33.6423494  
59 H 37.1589862 28.8044724 32.2074864  
60 H 35.8625601 28.5692753 33.3798860  
61 H 37.6651554 27.9308881 35.1296656  
62 H 38.8989457 28.3503407 33.9424939  
63 H 38.7150868 30.2045832 35.3943753  
64 H 38.0270520 30.7167152 33.8570083  
65 H 35.9299140 29.5850480 35.5026699  
66 H 34.5300996 30.6514712 36.6775090  
67 H 34.7892069 32.3385848 37.1409181  
68 H 37.8857112 32.6181043 35.3872609  
69 H 36.8056338 33.3777190 36.5359422  
70 H 38.0367355 25.1252642 32.4158350  
71 H 38.6032816 26.5621856 31.7921263  
72 H 38.7166797 26.2127026 33.4511193  
73 H 39.5204910 34.1981753 31.5296767  
74 H 47.5489958 31.4410359 30.8699221  
75 H 42.5786697 28.8254769 29.1196093

**AO-IM+0.0075**

1 C 41.9241310 28.4019688 29.8662222  
2 H 40.9065259 28.7838573 29.6991091  
3 H 41.8734022 27.3095165 29.7219939

4 C 42.3372135 28.7657538 31.2578813  
5 N 43.4408691 28.2626766 31.9230930  
6 H 44.1257859 27.5855882 31.5784733  
7 C 43.5324479 28.8862919 33.1180018  
8 H 44.3311637 28.7046116 33.8341086  
9 N 42.5447648 29.7462092 33.2731144  
10 C 41.7880933 29.6813647 32.1271146  
11 H 40.9278064 30.3295697 31.9778810  
12 C 40.0949612 34.5039906 32.3787016  
13 H 41.0846540 34.7926639 32.0026492  
14 H 39.6899741 35.3649737 32.9346712  
15 C 40.1575259 33.2991167 33.3233163  
16 O 39.1186516 32.9550150 33.9111373  
17 O 41.2980960 32.7280445 33.3997320  
18 C 47.4494032 32.1483511 31.6764628  
19 H 48.1454480 31.8862245 32.4861793  
20 H 47.8099662 33.0987605 31.2493937  
21 C 46.0651902 32.3149206 32.2159059  
22 N 45.0958363 33.0598178 31.5747571  
23 H 45.2173443 33.5848383 30.7012752  
24 C 43.9638907 33.0000075 32.3028115  
25 H 43.0258859 33.4699335 32.0246495  
26 N 44.1397368 32.2689525 33.3945400  
27 C 45.4508513 31.8397968 33.3556083  
28 H 45.8793942 31.2348733 34.1524372  
29 Fe 42.3942328 31.4898389 34.5107211  
30 O 41.7895432 32.2684331 36.5451174  
31 O 42.7686587 32.2455232 37.5863768  
32 C 40.8594092 31.1105990 36.7369434  
33 O 40.6636919 30.6139100 35.6157627  
34 O 40.5164609 30.8616896 37.8709291  
35 C 43.7353945 31.3533047 37.2823297  
36 O 43.7442154 30.7538161 36.2110740  
37 C 44.7116806 31.2255611 38.3946661  
38 C 46.1026735 31.7463418 38.0267803  
39 C 47.1863663 31.1463635 38.9572314  
40 O 48.2135138 31.8421157 39.0879864  
41 O 46.9483655 30.0119861 39.4441244  
42 H 46.3542668 31.4325088 36.9981926  
43 H 46.1602931 32.8438426 38.0601937  
44 H 44.3184908 31.7301803 39.2887295  
45 H 44.8358965 30.1532706 38.6266521  
46 N 38.0330403 26.0943532 32.5368514  
47 C 36.6745733 26.6988700 32.6859072  
48 C 35.8347183 26.3627438 31.4268667  
49 O 36.4785639 25.9290099 30.4221227  
50 C 36.7700953 28.2145173 32.9279372  
51 C 37.8132641 28.6407112 33.9747915  
52 C 37.7492490 30.1191024 34.3565195  
53 N 36.5871667 30.3630688 35.2005274  
54 C 36.3250099 31.4685337 35.9165913  
55 N 35.2222812 31.4484054 36.6802374  
56 N 37.1293348 32.5279004 35.8887725  
57 O 34.6128454 26.5723500 31.4979005  
58 H 36.2169736 26.2119826 33.5609422  
59 H 36.9802222 28.7271247 31.9737102  
60 H 35.7614482 28.5306744 33.2296218  
61 H 37.7129192 28.0343356 34.8923562

62 H 38.8308362 28.4551639 33.5939434  
63 H 38.6727278 30.3880740 34.8895312  
64 H 37.7172305 30.7533347 33.4525664  
65 H 35.8951322 29.6176791 35.3108829  
66 H 34.6039918 30.6431626 36.6298600  
67 H 34.9032313 32.3013408 37.1468044  
68 H 37.9210591 32.6129296 35.2319663  
69 H 36.9231372 33.3395520 36.4695988  
70 H 37.9615735 25.0755584 32.3891481  
71 H 38.5318830 26.4953632 31.7237330  
72 H 38.6190149 26.2011969 33.3948974  
73 H 39.4572499 34.2573765 31.5298360  
74 H 47.5615356 31.4180395 30.8751274  
75 H 42.5803758 28.7859088 29.0851972

**AO-RC+0.010**

1 C 41.9223538 28.4647967 29.9220368  
2 H 40.9094598 28.8518224 29.7387769  
3 H 41.8638779 27.3699335 29.7934008  
4 C 42.3132263 28.8435942 31.3165698  
5 N 43.3955115 28.3364224 32.0157333  
6 H 44.0895788 27.6623072 31.6841458  
7 C 43.4435077 28.9577173 33.2167316  
8 H 44.2213233 28.7789558 33.9570183  
9 N 42.4521959 29.8193214 33.3419785  
10 C 41.7374161 29.7591517 32.1691225  
11 H 40.8944855 30.4228986 31.9935266  
12 C 40.0950594 34.4148993 32.3595108  
13 H 41.1077242 34.6519006 32.0089068  
14 H 39.7237325 35.2914770 32.9133670  
15 C 40.0651075 33.1861899 33.2763855  
16 O 39.0003589 32.9252196 33.8666059  
17 O 41.1305120 32.4845220 33.3109036  
18 C 47.4344860 32.1929509 31.6954408  
19 H 48.1220838 31.9372549 32.5147083  
20 H 47.7957973 33.1448027 31.2722372  
21 C 46.0412850 32.3499900 32.2152419  
22 N 45.0709318 33.0731514 31.5500521  
23 H 45.2055055 33.6089946 30.6851622  
24 C 43.9247599 32.9933095 32.2519022  
25 H 42.9855191 33.4463635 31.9491652  
26 N 44.0954826 32.2707696 33.3484263  
27 C 45.4147474 31.8686829 33.3451779  
28 H 45.8343491 31.2894253 34.1653816  
29 Fe 42.4248158 31.6275107 34.5945173  
30 O 42.5304828 33.5483063 35.5390816  
31 O 42.6059425 33.7383059 36.7359896  
32 C 41.8055464 30.6669535 37.2562642  
33 O 41.2676069 30.9351791 36.1292104  
34 O 41.2416848 30.2915717 38.2825807  
35 C 43.3621578 30.8040937 37.2530398  
36 O 43.8740670 30.9633830 36.1381703  
37 C 44.1146529 30.6997961 38.5218283  
38 C 45.3817761 31.5559427 38.6102550  
39 C 46.5805946 30.8132890 39.2508873  
40 O 47.6174375 31.4992141 39.3491015  
41 O 46.4290112 29.6076432 39.5860373  
42 H 45.7111436 31.8807928 37.6107469

43 H 45.2042986 32.4779509 39.1864120  
44 H 43.4145996 30.8506732 39.3552199  
45 H 44.4774840 29.6501356 38.6367564  
46 N 38.1419103 26.1674526 32.5602266  
47 C 36.7819310 26.7613510 32.7444828  
48 C 35.9277191 26.4379976 31.4857458  
49 O 36.5533550 25.9692006 30.4826411  
50 C 36.8900657 28.2620672 33.0740547  
51 C 37.8795123 28.5860421 34.2133833  
52 C 37.8972545 30.0457288 34.6750482  
53 N 36.6312732 30.3765917 35.3163295  
54 C 36.3291479 31.5124682 35.9756810  
55 N 35.1758924 31.5224430 36.6599826  
56 N 37.1371313 32.5653275 35.9657062  
57 O 34.7075828 26.6554833 31.5575449  
58 H 36.3348653 26.2353701 33.6029203  
59 H 37.1659316 28.8248783 32.1651638  
60 H 35.8729540 28.5819927 33.3409218  
61 H 37.6693511 27.9392543 35.0848016  
62 H 38.9100959 28.3524153 33.9001361  
63 H 38.7396960 30.1908043 35.3746596  
64 H 38.0932839 30.7304377 33.8335762  
65 H 35.9519603 29.6251677 35.4571174  
66 H 34.5672137 30.7104485 36.6172866  
67 H 34.8500726 32.3879306 37.0990694  
68 H 37.9414356 32.6379874 35.3224812  
69 H 36.8983544 33.3970974 36.5069712  
70 H 38.0750304 25.1609330 32.3536935  
71 H 38.6380531 26.6111427 31.7672427  
72 H 38.7279106 26.2319424 33.4226339  
73 H 39.4612580 34.2120031 31.4962634  
74 H 47.5549547 31.4605020 30.8972722  
75 H 42.5817873 28.8277167 29.1336817

**AO-TS+0.010**

1 C 41.9324078 28.4683914 29.9197202  
2 H 40.9171645 28.8442835 29.7273477  
3 H 41.8858038 27.3721318 29.8027963  
4 C 42.3122448 28.8658112 31.3119390  
5 N 43.3673308 28.3448063 32.0436287  
6 H 44.0478051 27.6462850 31.7337097  
7 C 43.4106612 28.9866866 33.2334343  
8 H 44.1564931 28.8103323 34.0070425  
9 N 42.4414004 29.8791234 33.3130795  
10 C 41.7470424 29.8167284 32.1307076  
11 H 40.9153046 30.4860686 31.9283846  
12 C 40.1326594 34.4228654 32.4013164  
13 H 41.1506579 34.6423719 32.0584962  
14 H 39.7658286 35.3170333 32.9305181  
15 C 40.0896748 33.2294797 33.3591601  
16 O 39.0146986 32.9301016 33.8940687  
17 O 41.1962692 32.5888575 33.4994855  
18 C 47.4407980 32.1998470 31.6987951  
19 H 48.1229532 31.9406413 32.5214177  
20 H 47.8090423 33.1498950 31.2778555  
21 C 46.0453623 32.3638988 32.2103517  
22 N 45.0869090 33.1035594 31.5433578  
23 H 45.2339088 33.6476283 30.6855073

24 C 43.9332369 33.0251608 32.2291571  
25 H 43.0059604 33.5010982 31.9266350  
26 N 44.0891952 32.2862540 33.3169091  
27 C 45.4047456 31.8746237 33.3278753  
28 H 45.8011971 31.2835141 34.1506706  
29 Fe 42.4869311 31.6318502 34.6208638  
30 O 42.6851661 33.1537864 36.0005106  
31 O 43.0138601 32.6018181 37.2043892  
32 C 41.7272410 30.6530649 37.1549545  
33 O 41.1655344 30.7977307 36.0142548  
34 O 41.2515367 30.2038689 38.1871388  
35 C 43.2526883 31.1970286 37.1098228  
36 O 43.7333821 30.8652056 35.8927324  
37 C 44.1006797 30.8002612 38.3153582  
38 C 45.4653471 31.4863248 38.3165395  
39 C 46.5590347 30.8087416 39.1590945  
40 O 47.6065469 31.4849261 39.2853458  
41 O 46.3780536 29.6501870 39.6111804  
42 H 45.8621428 31.5307185 37.2873185  
43 H 45.3867584 32.5334630 38.6496352  
44 H 43.5264079 31.0206504 39.2278028  
45 H 44.2305005 29.7089071 38.2792040  
46 N 38.1473866 26.1727987 32.5638357  
47 C 36.7838722 26.7569326 32.7515138  
48 C 35.9322900 26.4359129 31.4902259  
49 O 36.5611936 25.9726835 30.4864322  
50 C 36.8829863 28.2564612 33.0896622  
51 C 37.8707334 28.5828656 34.2300632  
52 C 37.8858673 30.0435994 34.6895122  
53 N 36.6271854 30.3697025 35.3473831  
54 C 36.3199547 31.5039888 36.0059592  
55 N 35.1573916 31.5165694 36.6739268  
56 N 37.1307796 32.5558688 36.0132337  
57 O 34.7115597 26.6496465 31.5607634  
58 H 36.3399312 26.2229231 33.6065970  
59 H 37.1552231 28.8252105 32.1830599  
60 H 35.8636981 28.5683362 33.3578741  
61 H 37.6628985 27.9366466 35.1023259  
62 H 38.9023145 28.3516794 33.9184247  
63 H 38.7398039 30.1935629 35.3738682  
64 H 38.0629894 30.7237421 33.8398525  
65 H 35.9401977 29.6222785 35.4713391  
66 H 34.5435298 30.7091830 36.6174715  
67 H 34.8314778 32.3826601 37.1118222  
68 H 37.9497293 32.6224691 35.3933179  
69 H 36.8856168 33.3878575 36.5518532  
70 H 38.0877102 25.1675879 32.3496316  
71 H 38.6410930 26.6247158 31.7741882  
72 H 38.7323759 26.2343126 33.4272669  
73 H 39.5043208 34.2106881 31.5363086  
74 H 47.5596308 31.4667510 30.9009756  
75 H 42.5921239 28.8325424 29.1321697

**AO-IM+0.010**

1 C 41.9406178 28.4103442 29.8859431  
2 H 40.9188915 28.7815171 29.7183015  
3 H 41.8981523 27.3158523 29.7505032  
4 C 42.3532801 28.7899626 31.2731081

5 N 43.4591098 28.2964494 31.9429893  
6 H 44.1493378 27.6243226 31.6010007  
7 C 43.5481119 28.9347695 33.1315768  
8 H 44.3463354 28.7660526 33.8519330  
9 N 42.5586151 29.7920815 33.2761892  
10 C 41.8024974 29.7148193 32.1321533  
11 H 40.9436415 30.3640306 31.9773363  
12 C 40.0585230 34.5139491 32.3892739  
13 H 41.0400280 34.8374533 32.0195801  
14 H 39.6291671 35.3541914 32.9582818  
15 C 40.1496057 33.2922728 33.3087918  
16 O 39.1189922 32.9160644 33.8936491  
17 O 41.2965352 32.7321355 33.3639490  
18 C 47.4579775 32.1731964 31.7219037  
19 H 48.1444269 31.8946770 32.5345894  
20 H 47.8341098 33.1243639 31.3102355  
21 C 46.0729354 32.3523616 32.2552435  
22 N 45.1182029 33.1213042 31.6194907  
23 H 45.2555582 33.6658093 30.7603148  
24 C 43.9826115 33.0709662 32.3420640  
25 H 43.0549635 33.5627839 32.0668076  
26 N 44.1411223 32.3207542 33.4230546  
27 C 45.4458624 31.8719377 33.3854734  
28 H 45.8622138 31.2570443 34.1809931  
29 Fe 42.3975353 31.5356151 34.5241760  
30 O 41.7592209 32.2306376 36.5499227  
31 O 42.7465759 32.2455554 37.5840935  
32 C 40.8886752 31.0292851 36.7264003  
33 O 40.6584910 30.5843680 35.5889629  
34 O 40.6185081 30.7060973 37.8606303  
35 C 43.7343239 31.3787934 37.2761313  
36 O 43.7467550 30.7798756 36.2015250  
37 C 44.7191496 31.2687217 38.3791075  
38 C 46.1261075 31.7033446 37.9674199  
39 C 47.1953359 31.0818612 38.9011738  
40 O 48.2451185 31.7453029 39.0017711  
41 O 46.9230128 29.9668587 39.4162244  
42 H 46.3451891 31.3414263 36.9465627  
43 H 46.2401880 32.7965939 37.9636351  
44 H 44.3613901 31.8310863 39.2536554  
45 H 44.7996868 30.2029423 38.6624122  
46 N 38.0558416 26.1255313 32.5202514  
47 C 36.6841810 26.7016335 32.6657948  
48 C 35.8499551 26.3339704 31.4116707  
49 O 36.4982316 25.8978174 30.4087199  
50 C 36.7565428 28.2191984 32.91113494  
51 C 37.7950426 28.6524593 33.9626569  
52 C 37.7375856 30.1334367 34.3389261  
53 N 36.5792272 30.3920867 35.1822974  
54 C 36.3327260 31.5026958 35.9014993  
55 N 35.2266807 31.4942437 36.6601518  
56 N 37.1484663 32.5504056 35.8784222  
57 O 34.6224433 26.5102172 31.4803052  
58 H 36.2382758 26.2086845 33.5435553  
59 H 36.9611777 28.7371787 31.9585769  
60 H 35.7442359 28.5218733 33.2142876  
61 H 37.6899334 28.0486764 34.8816835  
62 H 38.8145089 28.4656148 33.5868944

63 H 38.6651933 30.3968395 34.8685108  
64 H 37.7135798 30.7638600 33.4320470  
65 H 35.8770612 29.6568482 35.2914518  
66 H 34.5981520 30.6992715 36.6057912  
67 H 34.9223921 32.3478552 37.1367393  
68 H 37.9435184 32.6278568 35.2231316  
69 H 36.9549856 33.3628920 36.4646877  
70 H 38.0083484 25.1102042 32.3518170  
71 H 38.5585100 26.5502414 31.7211519  
72 H 38.6276914 26.2273897 33.3890949  
73 H 39.4289628 34.2606353 31.5363066  
74 H 47.5664458 31.4511920 30.9125759  
75 H 42.5911482 28.7929936 29.0995228

**AO-RC-0.0025**

1 C 41.8521389 28.4164805 29.9338682  
2 H 40.8502113 28.8388674 29.7781580  
3 H 41.7550929 27.3263075 29.8103645  
4 C 42.2933229 28.7767981 31.3182108  
5 N 43.3672993 28.2317680 32.0010885  
6 H 44.0111612 27.5032961 31.6678361  
7 C 43.4670752 28.8366525 33.1990444  
8 H 44.2452123 28.6140885 33.9254234  
9 N 42.5061152 29.7424865 33.3454176  
10 C 41.7630968 29.7060263 32.1818571  
11 H 40.9127096 30.3610668 32.0272959  
12 C 40.2396943 34.3414337 32.3952937  
13 H 41.2713411 34.4377847 32.0384166  
14 H 39.9782436 35.2745238 32.9187704  
15 C 40.0851373 33.1838422 33.3868265  
16 O 39.0134706 33.0361674 33.9754870  
17 O 41.1220157 32.4248238 33.5131095  
18 C 47.4047996 32.0943696 31.5604313  
19 H 48.1002107 31.8722231 32.3819282  
20 H 47.7438216 33.0356820 31.0964283  
21 C 46.0121680 32.2419485 32.0823135  
22 N 45.0092753 32.8777941 31.3777460  
23 H 45.1100676 33.3280886 30.4613834  
24 C 43.8689051 32.7915418 32.0842840  
25 H 42.9067750 33.1584008 31.7402113  
26 N 44.0797390 32.1639362 33.2323143  
27 C 45.4142102 31.8168687 33.2487750  
28 H 45.8500931 31.2835927 34.0902717  
29 Fe 42.4723331 31.5179689 34.5400042  
30 O 42.8124964 33.2716924 35.6759359  
31 O 42.9851973 33.1689400 36.9332712  
32 C 42.0019550 30.7565597 37.2335708  
33 O 41.3832026 30.8770897 36.1141615  
34 O 41.4956288 30.4992660 38.3260353  
35 C 43.5310408 30.9341715 37.0849083  
36 O 43.9636769 30.8770658 35.9148878  
37 C 44.4148499 30.9185922 38.2899360  
38 C 45.7354631 31.6759285 38.1523675  
39 C 46.8537889 31.1868350 39.1045487  
40 O 47.8301263 31.9676193 39.2665515  
41 O 46.7266755 30.0404654 39.5974240  
42 H 46.1202652 31.5462796 37.1262594  
43 H 45.5949200 32.7604037 38.2837529

44 H 43.8200670 31.2445651 39.1558728  
 45 H 44.6669641 29.8591467 38.4960815  
 46 N 38.0775171 25.9978095 32.7270310  
 47 C 36.7767665 26.7033600 32.9164525  
 48 C 35.9299695 26.5271115 31.6215928  
 49 O 36.5630458 26.1134726 30.6100311  
 50 C 36.9646783 28.1922261 33.2440788  
 51 C 37.9424367 28.5081689 34.3863351  
 52 C 37.9111944 29.9684600 34.8333889  
 53 N 36.6343625 30.2456344 35.4857584  
 54 C 36.2500461 31.3860453 36.0600209  
 55 N 35.0731465 31.3946580 36.7035745  
 56 N 37.0279814 32.4756658 36.0381453  
 57 O 34.7352702 26.8517464 31.6979754  
 58 H 36.2651212 26.1951313 33.7478496  
 59 H 37.2807267 28.7341270 32.3372593  
 60 H 35.9545601 28.5586437 33.4796899  
 61 H 37.7429733 27.8651025 35.2621833  
 62 H 38.9769081 28.2889219 34.0798692  
 63 H 38.7449604 30.1691386 35.5282788  
 64 H 38.0491575 30.6444197 33.9727769  
 65 H 35.9666419 29.4755027 35.5925081  
 66 H 34.4965865 30.5519771 36.6740647  
 67 H 34.7067314 32.2652433 37.0864604  
 68 H 37.8324215 32.5540943 35.4053059  
 69 H 36.6901798 33.3285253 36.4752618  
 70 H 37.9231520 24.9746207 32.6379262  
 71 H 38.5276756 26.3035650 31.8516410  
 72 H 38.7412839 26.1062068 33.5227128  
 73 H 39.5813813 34.2015955 31.5378928  
 74 H 47.5397671 31.3378141 30.7874664  
 75 H 42.5045221 28.7578656 29.1301771

**AO-TS-0.0025**

1 C 41.8302461 28.4343413 29.9584397  
 2 H 40.8307482 28.8580929 29.7917204  
 3 H 41.7337212 27.3440063 29.8354991  
 4 C 42.2541675 28.7964071 31.3464069  
 5 N 43.3125198 28.2448316 32.0485362  
 6 H 43.9556613 27.5122274 31.7242673  
 7 C 43.3891335 28.8458335 33.2510300  
 8 H 44.1481354 28.6238505 33.9979564  
 9 N 42.4266701 29.7527693 33.3810962  
 10 C 41.7087030 29.7235745 32.2028234  
 11 H 40.8647353 30.3826018 32.0307109  
 12 C 40.2432986 34.3397242 32.3988014  
 13 H 41.2764286 34.4156752 32.0415974  
 14 H 39.9969847 35.2819266 32.9133325  
 15 C 40.0808408 33.1930103 33.4032621  
 16 O 39.0015494 33.0575144 33.9857465  
 17 O 41.1144192 32.4375487 33.5467648  
 18 C 47.4090148 32.0970573 31.5697223  
 19 H 48.0913931 31.8659703 32.3997254  
 20 H 47.7589053 33.0376757 31.1130747  
 21 C 46.0112892 32.2494447 32.0745823  
 22 N 45.0171293 32.8857241 31.3581667  
 23 H 45.1298821 33.3408614 30.4464004  
 24 C 43.8635462 32.7859713 32.0396246

25 H 42.9044304 33.1501592 31.6818675  
 26 N 44.0601834 32.1446547 33.1813492  
 27 C 45.3953076 31.8076427 33.2240858  
 28 H 45.8167723 31.2712247 34.0711359  
 29 Fe 42.5237493 31.5526183 34.5361710  
 30 O 42.7937333 33.0976462 35.7810714  
 31 O 43.1911790 32.6764239 37.0272689  
 32 C 41.8502853 30.7383493 37.2598793  
 33 O 41.2922513 30.7819726 36.1563843  
 34 O 41.5131456 30.4624025 38.3946218  
 35 C 43.5731418 31.3035633 37.0166012  
 36 O 43.8866189 30.8363661 35.8522221  
 37 C 44.4337938 30.9864582 38.2303415  
 38 C 45.7856990 31.7073029 38.1773061  
 39 C 46.8681277 31.1824313 39.1478558  
 40 O 47.8566690 31.9490733 39.3144411  
 41 O 46.7105093 30.0450114 39.6468581  
 42 H 46.2097164 31.6119431 37.1627667  
 43 H 45.6655534 32.7889558 38.3467843  
 44 H 43.8675186 31.2515712 39.1348752  
 45 H 44.6067741 29.9008065 38.2505445  
 46 N 38.0797943 26.0089436 32.7113568  
 47 C 36.7755632 26.7062587 32.9074417  
 48 C 35.9229701 26.5251927 31.6172482  
 49 O 36.5510073 26.1055828 30.6052364  
 50 C 36.9577532 28.1958069 33.2331984  
 51 C 37.9385307 28.5150395 34.3714345  
 52 C 37.8992272 29.9737954 34.8209623  
 53 N 36.6252921 30.2423435 35.4816841  
 54 C 36.2420168 31.3794609 36.0624819  
 55 N 35.0697592 31.3828749 36.7152000  
 56 N 37.0195783 32.4697935 36.0419938  
 57 O 34.7291792 26.8526616 31.6968939  
 58 H 36.2706054 26.1952653 33.7413061  
 59 H 37.2687441 28.7386364 32.3252077  
 60 H 35.9472079 28.5586333 33.4723216  
 61 H 37.7471204 27.8698745 35.2475246  
 62 H 38.9733514 28.3042114 34.0604864  
 63 H 38.7356444 30.1774708 35.5114376  
 64 H 38.0284382 30.6527416 33.9613966  
 65 H 35.9599234 29.4700061 35.5875364  
 66 H 34.4912839 30.5415122 36.6795057  
 67 H 34.6989996 32.2546101 37.0913344  
 68 H 37.8144024 32.5574605 35.3964526  
 69 H 36.6788988 33.3212533 36.4798645  
 70 H 37.9297937 24.9858204 32.6164748  
 71 H 38.5273684 26.3231739 31.8373645  
 72 H 38.7443046 26.1154787 33.5067864  
 73 H 39.5832059 34.2003633 31.5426920  
 74 H 47.5431829 31.3404905 30.7966294  
 75 H 42.4871083 28.7743102 29.1578022

**AO-IM-0.0025**

1 C 41.8621086 28.4306502 29.8523164  
 2 H 40.8584772 28.8486715 29.6900161  
 3 H 41.7679633 27.3388343 29.7430632  
 4 C 42.3135915 28.8139076 31.2272618  
 5 N 43.3864241 28.2641462 31.9059269



6 H 44.0127580 27.5171557 31.5839857  
 7 C 43.5221839 28.9077541 33.0823701  
 8 H 44.3067211 28.6858290 33.8025723  
 9 N 42.5891937 29.8399795 33.2167244  
 10 C 41.8235476 29.7843377 32.0714477  
 11 H 40.9802375 30.4516326 31.9255747  
 12 C 40.2235559 34.1235871 32.3896753  
 13 H 41.2577817 33.9692786 32.0632088  
 14 H 40.1532799 35.1305666 32.8304452  
 15 C 39.8415929 33.0816516 33.4619281  
 16 O 38.6833449 33.1488752 33.9282830  
 17 O 40.7169602 32.2287223 33.7924918  
 18 C 47.4700174 32.0998410 31.5065782  
 19 H 48.1577799 31.8576400 32.3284161  
 20 H 47.8449250 33.0247976 31.0369647  
 21 C 46.0869215 32.3121614 32.0303913  
 22 N 45.1144314 32.9864038 31.3212121  
 23 H 45.2290338 33.4190046 30.3987030  
 24 C 43.9823998 32.9890111 32.0451924  
 25 H 43.0509238 33.4222330 31.6926941  
 26 N 44.1631212 32.3798497 33.2068530  
 27 C 45.4762114 31.9512532 33.2117498  
 28 H 45.8876224 31.3989076 34.0539060  
 29 Fe 42.5723965 31.5945281 34.4231476  
 30 O 42.0034800 32.4079879 36.2033961  
 31 O 42.9568431 32.3174721 37.2709195  
 32 C 40.8914898 30.1850777 36.8627847  
 33 O 40.8058548 29.7933880 35.7769330  
 34 O 40.9209611 30.4248122 38.0119840  
 35 C 43.9397109 31.4714383 37.0377812  
 36 O 44.0789842 30.9018104 35.9530463  
 37 C 44.8377143 31.2748527 38.2258015  
 38 C 46.1544608 32.0511773 38.1380641  
 39 C 47.2523279 31.4760038 39.0629826  
 40 O 48.2359104 32.2262046 39.2895118  
 41 O 47.0949417 30.3037762 39.4755816  
 42 H 46.5447201 32.0010524 37.1074103  
 43 H 46.0189664 33.1216761 38.3606141  
 44 H 44.2877899 31.5408112 39.1410642  
 45 H 45.0968956 30.2072602 38.2817336  
 46 N 38.0209114 26.0362002 32.6234955  
 47 C 36.6899847 26.6829121 32.8142974  
 48 C 35.8249727 26.4469591 31.5452387  
 49 O 36.4491690 26.0344923 30.5292127  
 50 C 36.8099167 28.1910318 33.0699067  
 51 C 37.8451595 28.6368153 34.1100317  
 52 C 37.6992848 30.1144702 34.4664797  
 53 N 36.5332946 30.2928852 35.3269721  
 54 C 36.1959859 31.3898139 36.0082617  
 55 N 35.0817879 31.3324703 36.7614794  
 56 N 36.9632803 32.4829363 35.9963115  
 57 O 34.6248728 26.7493384 31.6406741  
 58 H 36.2215696 26.1815573 33.6745618  
 59 H 37.0228622 28.7069513 32.1192377  
 60 H 35.7994157 28.5112376 33.3621500  
 61 H 37.7693262 28.0355277 35.0327077  
 62 H 38.8661773 28.4833052 33.7272565  
 63 H 38.5984525 30.4826041 34.9788979

64 H 37.6018584 30.7263298 33.5537453  
 65 H 35.8615784 29.5232722 35.4045154  
 66 H 34.4937730 30.5001423 36.6892133  
 67 H 34.7082486 32.1908417 37.1647308  
 68 H 37.6933323 32.6400022 35.2685991  
 69 H 36.6410596 33.2989532 36.5099966  
 70 H 37.9084409 25.0105181 32.5130090  
 71 H 38.4779952 26.3892986 31.7671437  
 72 H 38.6582465 26.1499354 33.4403156  
 73 H 39.5715226 34.0689660 31.5179321  
 74 H 47.5804500 31.3373456 30.7355577  
 75 H 42.5208139 28.7648255 29.0507546

**AO-RC-0.0050**

1 C 41.8107311 28.3940528 29.9469091  
 2 H 40.8068097 28.8130989 29.7919567  
 3 H 41.7146738 27.3031652 29.8297059  
 4 C 42.2601340 28.7592273 31.3278195  
 5 N 43.3330668 28.2073757 32.0071418  
 6 H 43.9634383 27.4649192 31.6752581  
 7 C 43.4483965 28.8149119 33.2003778  
 8 H 44.2287009 28.5845306 33.9217791  
 9 N 42.4963174 29.7323986 33.3503207  
 10 C 41.7441899 29.6974275 32.1906798  
 11 H 40.8953641 30.3550392 32.0408524  
 12 C 40.2557580 34.3318515 32.3942985  
 13 H 41.2860785 34.4111126 32.0292446  
 14 H 40.0113301 35.2718086 32.9139252  
 15 C 40.0949351 33.1865051 33.4001510  
 16 O 39.0251191 33.0548339 33.9944321  
 17 O 41.1303392 32.4266457 33.5370579  
 18 C 47.3936455 32.0686990 31.5366880  
 19 H 48.0921578 31.8526080 32.3570042  
 20 H 47.7284421 33.0067935 31.0630136  
 21 C 46.0031590 32.2169991 32.0626948  
 22 N 44.9921061 32.8322068 31.3520322  
 23 H 45.0841252 33.2621100 30.4252353  
 24 C 43.8553705 32.7483328 32.0645240  
 25 H 42.8875101 33.0947892 31.7154730  
 26 N 44.0775138 32.1448845 33.2235312  
 27 C 45.4145619 31.8084305 33.2395880  
 28 H 45.8574571 31.2878792 34.0852961  
 29 Fe 42.4803945 31.4954520 34.5370270  
 30 O 42.8416964 33.2817534 35.6681481  
 31 O 43.0338006 33.1824012 36.9253870  
 32 C 42.0335511 30.7889818 37.2518291  
 33 O 41.4070149 30.8934882 36.1361238  
 34 O 41.5344810 30.5471051 38.3520544  
 35 C 43.5598029 30.9703593 37.0876407  
 36 O 43.9859866 30.8909598 35.9163556  
 37 C 44.4537440 30.9658973 38.2886232  
 38 C 45.7752429 31.7192019 38.1349326  
 39 C 46.8915700 31.2600151 39.1033877  
 40 O 47.8649421 32.0496263 39.2607928  
 41 O 46.7714909 30.1242132 39.6186984  
 42 H 46.1610129 31.5579515 37.1137266  
 43 H 45.6333405 32.8076013 38.2304643  
 44 H 43.8649560 31.3045685 39.1539407

45 H 44.7010566 29.9079298 38.5039931  
46 N 38.1157473 25.9942149 32.6846536  
47 C 36.8119166 26.6742991 32.9352133  
48 C 35.9063843 26.4900636 31.6800619  
49 O 36.4724786 26.0319406 30.6543839  
50 C 36.9779967 28.1636639 33.2625687  
51 C 37.9578097 28.5003844 34.3953891  
52 C 37.9037561 29.9618062 34.8333662  
53 N 36.6263574 30.2234122 35.4930171  
54 C 36.2306076 31.3634784 36.0533966  
55 N 35.0516508 31.3744661 36.6939235  
56 N 37.0060247 32.4583222 36.0287501  
57 O 34.7274104 26.8579190 31.8101990  
58 H 36.3465546 26.1484271 33.7824548  
59 H 37.2740475 28.7123446 32.3525504  
60 H 35.9615899 28.5086646 33.5045076  
61 H 37.7761382 27.8588750 35.2759085  
62 H 38.9938627 28.2971760 34.0836808  
63 H 38.7358423 30.1842041 35.5236698  
64 H 38.0217003 30.6334758 33.9660761  
65 H 35.9612021 29.4491922 35.5918789  
66 H 34.4775902 30.5281944 36.6634182  
67 H 34.6767417 32.2483805 37.0578845  
68 H 37.8090577 32.5360874 35.3948297  
69 H 36.6495884 33.3158170 36.4392665  
70 H 37.9682768 24.9691038 32.5932975  
71 H 38.5223514 26.3171345 31.7938945  
72 H 38.8050951 26.1010460 33.4577077  
73 H 39.5888775 34.1985378 31.5424975  
74 H 47.5280965 31.3063494 30.7693464  
75 H 42.4622964 28.7301677 29.1403382

**AO-TS-0.0050**

1 C 41.8050496 28.3931946 29.9357638  
2 H 40.8016200 28.8108627 29.7742547  
3 H 41.7106098 27.3020059 29.8208278  
4 C 42.2459930 28.7606387 31.3187249  
5 N 43.3125372 28.2031403 32.0058935  
6 H 43.9417730 27.4585708 31.6754440  
7 C 43.4245032 28.8083245 33.1990549  
8 H 44.1976937 28.5791635 33.9289314  
9 N 42.4741649 29.7311932 33.3403594  
10 C 41.7290146 29.7025372 32.1766355  
11 H 40.8844381 30.3646851 32.0232114  
12 C 40.2764507 34.3284258 32.4137165  
13 H 41.3037696 34.4243328 32.0436576  
14 H 40.0223107 35.2656235 32.9343738  
15 C 40.1414732 33.1853609 33.4300576  
16 O 39.0654190 33.0270613 34.0091004  
17 O 41.2029812 32.4728714 33.5971674  
18 C 47.4015879 32.0704124 31.5324995  
19 H 48.0996263 31.8535902 32.3529783  
20 H 47.7384221 33.0066216 31.0565041  
21 C 46.0116213 32.2210730 32.0582470  
22 N 44.9996380 32.8333327 31.3451394  
23 H 45.0918441 33.2650240 30.4192864  
24 C 43.8618062 32.7474069 32.0552177  
25 H 42.8932501 33.0929778 31.7077555

26 N 44.0849428 32.1457951 33.2145346  
27 C 45.4224310 31.8130512 33.2349131  
28 H 45.8606629 31.2959560 34.0853425  
29 Fe 42.5424185 31.4368023 34.5479220  
30 O 42.8404792 33.2556994 35.8361139  
31 O 43.2711715 32.8069480 37.0628136  
32 C 41.9596499 30.8774574 37.2827935  
33 O 41.3377287 30.9177122 36.1758320  
34 O 41.5486200 30.5352769 38.3856783  
35 C 43.4904961 31.4170435 37.0760359  
36 O 43.8881605 30.9578322 35.8806969  
37 C 44.4217777 31.1210102 38.2567673  
38 C 45.7928032 31.7887320 38.1306009  
39 C 46.8803552 31.2849447 39.1086410  
40 O 47.8740564 32.0501231 39.2758210  
41 O 46.7278217 30.1529268 39.6202566  
42 H 46.1804116 31.6036378 37.1134793  
43 H 45.7208188 32.8846521 38.2258911  
44 H 43.9049319 31.4176843 39.1831639  
45 H 44.5520441 30.0313923 38.3078052  
46 N 38.1108260 25.9905061 32.6794734  
47 C 36.8076895 26.6718191 32.9304107  
48 C 35.9015351 26.4892169 31.6756917  
49 O 36.4672237 26.0322655 30.6491395  
50 C 36.9758275 28.1608853 33.2577063  
51 C 37.9576452 28.4949291 34.3892611  
52 C 37.9076239 29.9557067 34.8285307  
53 N 36.6324304 30.2193016 35.4913466  
54 C 36.2397211 31.3618234 36.0483125  
55 N 35.0600955 31.3779715 36.6876017  
56 N 37.0190736 32.4539761 36.0210465  
57 O 34.7228205 26.8573831 31.8067037  
58 H 36.3421467 26.1466432 33.7779701  
59 H 37.2714652 28.7095712 32.3475545  
60 H 35.9603503 28.5073710 33.5012860  
61 H 37.7755850 27.8532914 35.2695579  
62 H 38.9928181 28.2895553 34.0762256  
63 H 38.7417110 30.1754020 35.5171956  
64 H 38.0249120 30.6287851 33.9622357  
65 H 35.9658799 29.4465193 35.5924552  
66 H 34.4830445 30.5338035 36.6567446  
67 H 34.6875297 32.2530577 37.0513307  
68 H 37.8276892 32.5253743 35.3927368  
69 H 36.6638701 33.3147047 36.4254958  
70 H 37.9625153 24.9654612 32.5889576  
71 H 38.5172722 26.3128726 31.7884333  
72 H 38.8006264 26.0968242 33.4522412  
73 H 39.6080499 34.1907946 31.5637959  
74 H 47.5326174 31.3061268 30.7664930  
75 H 42.4608008 28.7285407 29.1322711

**AO-IM-0.0050**

1 C 41.8296092 28.4145034 29.8538583  
2 H 40.8254049 28.8317867 29.6919084  
3 H 41.7341430 27.3225532 29.7491795  
4 C 42.2874221 28.8003043 31.2262275  
5 N 43.3552352 28.2412725 31.9044152  
6 H 43.9665671 27.4789568 31.5862621

7 C 43.5048225 28.8873487 33.0762717  
8 H 44.2892056 28.6568212 33.7936316  
9 N 42.5834372 29.8332283 33.2108794  
10 C 41.8123749 29.7809155 32.0674960  
11 H 40.9727425 30.4523051 31.9206008  
12 C 40.2334636 34.1090535 32.3811407  
13 H 41.2603134 33.9232536 32.0480895  
14 H 40.1955861 35.1229651 32.8105483  
15 C 39.8441454 33.0933251 33.4765561  
16 O 38.6832318 33.1683532 33.9341472  
17 O 40.7241402 32.2612506 33.8444165  
18 C 47.4672917 32.0756119 31.4789672  
19 H 48.1556135 31.8359610 32.3009352  
20 H 47.8412103 32.9975650 31.0024603  
21 C 46.0857700 32.2905691 32.0040991  
22 N 45.1060418 32.9457775 31.2879425  
23 H 45.2111593 33.3579094 30.3552032  
24 C 43.9777552 32.9548922 32.0173315  
25 H 43.0416452 33.3723523 31.6584731  
26 N 44.1678527 32.3695325 33.1897199  
27 C 45.4830269 31.9480258 33.1948581  
28 H 45.8999014 31.4059276 34.0407744  
29 Fe 42.5819760 31.5798610 34.4115200  
30 O 42.0981862 32.4574878 36.2020301  
31 O 43.0623179 32.3291699 37.2582905  
32 C 40.8837835 30.2849103 36.8800115  
33 O 40.8299807 29.8805078 35.7977055  
34 O 40.8810305 30.5417295 38.0265701  
35 C 44.0131540 31.4512901 37.0086322  
36 O 44.1199908 30.8775515 35.9247978  
37 C 44.9240042 31.2286704 38.1853992  
38 C 46.1840937 32.0994562 38.1689056  
39 C 47.3050066 31.5515529 39.0822858  
40 O 48.2702177 32.3259984 39.3144670  
41 O 47.1858348 30.3740310 39.4896424  
42 H 46.5945753 32.1453601 37.1459907  
43 H 45.9674206 33.1429726 38.4520115  
44 H 44.3568216 31.3940539 39.1140315  
45 H 45.2468167 30.1789574 38.1699437  
46 N 38.0408747 26.0060427 32.5720140  
47 C 36.7158806 26.6500702 32.8047123  
48 C 35.8036519 26.4070748 31.5676552  
49 O 36.3705538 25.9433893 30.5452419  
50 C 36.8331490 28.1572872 33.0577715  
51 C 37.8543579 28.6086978 34.1084437  
52 C 37.6999636 30.0861348 34.4613730  
53 N 36.5229978 30.2643844 35.3092510  
54 C 36.1839101 31.3585444 35.9883189  
55 N 35.0670247 31.3074258 36.7391014  
56 N 36.9568231 32.4515747 35.9840565  
57 O 34.6185558 26.7547758 31.7051588  
58 H 36.2761572 26.1450257 33.6776247  
59 H 37.0527969 28.6727360 32.1081609  
60 H 35.8177878 28.4736664 33.3377525  
61 H 37.7693777 28.0089460 35.0311123  
62 H 38.8808249 28.4563715 33.7401589  
63 H 38.5896804 30.4591677 34.9873484  
64 H 37.6082369 30.6968361 33.5471363

65 H 35.8509289 29.4935945 35.3799277  
66 H 34.4792346 30.4731477 36.6650786  
67 H 34.6877055 32.1695387 37.1265144  
68 H 37.6811159 32.6144754 35.2520433  
69 H 36.6180684 33.2707548 36.4803944  
70 H 37.9209784 24.9788303 32.4722724  
71 H 38.4654004 26.3562331 31.6973551  
72 H 38.7026405 26.1209012 33.3680606  
73 H 39.5734519 34.0650416 31.5148183  
74 H 47.5766642 31.3084614 30.7124264  
75 H 42.4890391 28.7443228 29.0510889

**AO-RC-0.0075**

1 C 41.7918767 28.3992625 29.9608477  
2 H 40.7896491 28.8221124 29.8084999  
3 H 41.6904540 27.3085350 29.8464495  
4 C 42.2457781 28.7633517 31.3406380  
5 N 43.3246028 28.2146363 32.0142318  
6 H 43.9514202 27.4685987 31.6799859  
7 C 43.4447399 28.8160200 33.2078814  
8 H 44.2304381 28.5849206 33.9229645  
9 N 42.4868996 29.7297450 33.3676446  
10 C 41.7277449 29.6940411 32.2106396  
11 H 40.8676741 30.3383389 32.0707641  
12 C 40.2790081 34.3334198 32.3924788  
13 H 41.3107425 34.3913377 32.0277617  
14 H 40.0528551 35.2798330 32.9089433  
15 C 40.1003391 33.1995699 33.4106139  
16 O 39.0253352 33.0843395 33.9982803  
17 O 41.1330142 32.4409569 33.5728093  
18 C 47.3812025 32.0559169 31.5287244  
19 H 48.0807789 31.8453176 32.3494348  
20 H 47.7126151 32.9916452 31.0476916  
21 C 45.9916827 32.2036645 32.0564517  
22 N 44.9715948 32.7924509 31.3369741  
23 H 45.0532404 33.1946683 30.3971162  
24 C 43.8376496 32.7094290 32.0536097  
25 H 42.8629746 33.0269388 31.6958482  
26 N 44.0712885 32.1362008 33.2259005  
27 C 45.4120771 31.8150286 33.2445052  
28 H 45.8620566 31.3115135 34.0966476  
29 Fe 42.4828836 31.4813897 34.5418174  
30 O 42.8677260 33.3025593 35.6727559  
31 O 43.0812908 33.2062437 36.9289925  
32 C 42.0621251 30.8307531 37.2796747  
33 O 41.4267772 30.9183994 36.1684670  
34 O 41.5712235 30.6045389 38.3877164  
35 C 43.5852820 31.0155367 37.0988511  
36 O 44.0041568 30.9143142 35.9265858  
37 C 44.4898660 31.0203669 38.2955604  
38 C 45.8121729 31.7693707 38.1261769  
39 C 46.9270351 31.3410513 39.1090418  
40 O 47.8968802 32.1397405 39.2600437  
41 O 46.8158545 30.2162018 39.6479641  
42 H 46.1991774 31.5774930 37.1107497  
43 H 45.6690040 32.8604264 38.1870619  
44 H 43.9075193 31.3709920 39.1607087  
45 H 44.7328747 29.9638915 38.5192591

46 N 38.0173664 25.9476482 32.7531038  
47 C 36.7571031 26.6983099 33.0142933  
48 C 35.8756383 26.6098795 31.7265436  
49 O 36.4865618 26.2861634 30.6839089  
50 C 36.9911715 28.1754590 33.3508614  
51 C 37.9756157 28.4854833 34.4854637  
52 C 37.9286226 29.9452663 34.9271083  
53 N 36.6413678 30.2101309 35.5676791  
54 C 36.2217839 31.3609868 36.0787704  
55 N 35.0304415 31.3825141 36.6971345  
56 N 36.9918168 32.4625482 36.0390044  
57 O 34.6811772 26.9276688 31.8677719  
58 H 36.2452962 26.1903182 33.8440604  
59 H 37.3131511 28.7123250 32.4433288  
60 H 35.9864123 28.5592490 33.5859175  
61 H 37.7879703 27.8412928 35.3627690  
62 H 39.0089519 28.2753255 34.1708824  
63 H 38.7502336 30.1655649 35.6307791  
64 H 38.0586470 30.6176414 34.0618845  
65 H 35.9775049 29.4335441 35.6635346  
66 H 34.4589977 30.5331158 36.6667216  
67 H 34.6377629 32.2656797 37.0142676  
68 H 37.7928434 32.5315189 35.4018148  
69 H 36.6055775 33.3311045 36.3939248  
70 H 37.8321999 24.9232504 32.7344392  
71 H 38.3486607 26.1798868 31.8034860  
72 H 38.7679073 26.0764307 33.4613373  
73 H 39.6103399 34.2134953 31.5400892  
74 H 47.5186277 31.2889638 30.7665142  
75 H 42.4422175 28.7288489 29.1506028

**AO-TS-0.0075**

1 C 41.7972145 28.4145350 29.9934816  
2 H 40.7928223 28.8319796 29.8381337  
3 H 41.6987719 27.3226790 29.8863203  
4 C 42.2473244 28.7901709 31.3721870  
5 N 43.3158647 28.2390972 32.0607868  
6 H 43.9410678 27.4891572 31.7345722  
7 C 43.4227942 28.8440431 33.2554384  
8 H 44.1954371 28.6135208 33.9860745  
9 N 42.4677136 29.7629089 33.3993783  
10 C 41.7226994 29.7252867 32.2339359  
11 H 40.8662943 30.3717925 32.0819023  
12 C 40.2822468 34.3351397 32.4036097  
13 H 41.3157909 34.3866328 32.0435162  
14 H 40.0591087 35.2805113 32.9229791  
15 C 40.1000357 33.1942960 33.4143148  
16 O 39.0233344 33.0824939 34.0043949  
17 O 41.1249588 32.4268401 33.5563952  
18 C 47.4091915 32.0590343 31.4976744  
19 H 48.1062637 31.8508356 32.3211109  
20 H 47.7438899 32.9906121 31.0112207  
21 C 46.0192643 32.2140145 32.0193912  
22 N 45.0064410 32.8080486 31.2942467  
23 H 45.0958333 33.2166974 30.3582977  
24 C 43.8647239 32.7176989 31.9957531  
25 H 42.8930240 33.0380106 31.6322061  
26 N 44.0890151 32.1356155 33.1637462

27 C 45.4278404 31.8118784 33.1961186  
28 H 45.8666554 31.2981456 34.0482762  
29 Fe 42.5542495 31.5521769 34.5242671  
30 O 42.7874576 33.1708346 35.7209167  
31 O 43.2487920 32.8146254 36.9797771  
32 C 41.8925525 30.8560236 37.3339571  
33 O 41.3253104 30.8792591 36.2418381  
34 O 41.6021395 30.5864499 38.4840759  
35 C 43.6308541 31.4563650 37.0273690  
36 O 43.9305715 30.9245784 35.8910842  
37 C 44.4990115 31.2002850 38.2528146  
38 C 45.8744445 31.8635775 38.1211238  
39 C 46.9444652 31.3848747 39.1300436  
40 O 47.9384977 32.1509483 39.3007799  
41 O 46.7839888 30.2639556 39.6603774  
42 H 46.2791774 31.6376038 37.1193520  
43 H 45.8015782 32.9625260 38.1712627  
44 H 43.9727998 31.5356055 39.1604290  
45 H 44.6394787 30.1136125 38.3473213  
46 N 38.0168500 25.9434108 32.7523392  
47 C 36.7564684 26.6937983 33.0143611  
48 C 35.8771559 26.6063473 31.7257947  
49 O 36.4877013 26.2842832 30.6826879  
50 C 36.9900437 28.1709510 33.3507763  
51 C 37.9756913 28.4814930 34.4838192  
52 C 37.9292300 29.9419773 34.9220716  
53 N 36.6433909 30.2094232 35.5645123  
54 C 36.2268842 31.3614453 36.0756235  
55 N 35.0351425 31.3855950 36.6936361  
56 N 37.0012914 32.4602848 36.0377480  
57 O 34.6828264 26.9250157 31.8681101  
58 H 36.2453139 26.1856137 33.8443157  
59 H 37.3110532 28.7078386 32.4431259  
60 H 35.9850190 28.5538250 33.5865425  
61 H 37.7878157 27.8385328 35.3620157  
62 H 39.0085893 28.2706762 34.1684676  
63 H 38.7511080 30.1625888 35.6254543  
64 H 38.0609323 30.6133076 34.0564871  
65 H 35.9772516 29.4345849 35.6591801  
66 H 34.4601222 30.5386862 36.6594050  
67 H 34.6432630 32.2701377 37.0082441  
68 H 37.7995095 32.5295980 35.3950983  
69 H 36.6134404 33.3310183 36.3858492  
70 H 37.8332593 24.9186771 32.7374372  
71 H 38.3438727 26.1723872 31.8003256  
72 H 38.7696735 26.0750829 33.4573947  
73 H 39.6159930 34.2159171 31.5492334  
74 H 47.5411027 31.2867038 30.7399329  
75 H 42.4423624 28.7378094 29.1765697

**AO-IM-0.0075**

1 C 41.7121094 28.3383480 29.7838550  
2 H 40.7215513 28.7785911 29.6068050  
3 H 41.6027535 27.2550132 29.6206841  
4 C 42.1151071 28.6395903 31.1932148  
5 N 43.1918717 28.0858071 31.8609834  
6 H 43.8465674 27.3718329 31.5158422  
7 C 43.2698677 28.6319272 33.0858684

8 H 44.0519074 28.3878529 33.8004711  
9 N 42.2862372 29.5057973 33.2735147  
10 C 41.5533142 29.5093240 32.1005837  
11 H 40.6759344 30.1352289 31.9704205  
12 C 40.2256310 34.3908567 32.3605010  
13 H 41.2585813 34.4296149 31.9945660  
14 H 40.0057140 35.3671363 32.8242538  
15 C 40.0591281 33.3113101 33.4457419  
16 O 38.9403347 33.1525271 33.9552555  
17 O 41.1388478 32.7032088 33.7566950  
18 C 47.2923327 32.0178215 31.5549095  
19 H 47.9840694 31.8090424 32.3838951  
20 H 47.6121935 32.9675019 31.0939643  
21 C 45.8914149 32.1296042 32.0635123  
22 N 44.8809635 32.7641563 31.3721304  
23 H 44.9727251 33.2070237 30.4518521  
24 C 43.7399118 32.6443947 32.0824572  
25 H 42.7709614 33.0023065 31.7464690  
26 N 43.9542845 31.9988480 33.2184052  
27 C 45.2936610 31.6704319 33.2176970  
28 H 45.7448997 31.0947490 34.0229598  
29 Fe 42.2573393 31.2302977 34.4463079  
30 O 42.2833048 32.4344292 36.5657296  
31 O 43.4829970 32.2835336 37.3372905  
32 C 41.2135785 31.4968974 37.1275661  
33 O 40.8243821 30.7662665 36.2065595  
34 O 40.9383502 31.6412262 38.2983597  
35 C 44.2143577 31.2537066 36.8562871  
36 O 43.8568834 30.5774639 35.9120865  
37 C 45.4757553 31.0190841 37.6292500  
38 C 46.0987711 32.1783363 38.4012747  
39 C 47.3002178 31.6733575 39.2318517  
40 O 48.2649427 32.4605671 39.4112972  
41 O 47.2157633 30.5005039 39.6653630  
42 H 46.4298378 32.9914730 37.7362194  
43 H 45.3567580 32.6119866 39.0950011  
44 H 45.2701834 30.2068997 38.3478785  
45 H 46.1862610 30.5909621 36.9076776  
46 N 37.9607347 25.9606927 32.6447704  
47 C 36.6793178 26.6737694 32.9136360  
48 C 35.7816859 26.5542294 31.6418467  
49 O 36.3842515 26.2338179 30.5937725  
50 C 36.8707574 28.1612417 33.2256538  
51 C 37.8806794 28.5229533 34.3181528  
52 C 37.8131250 29.9961305 34.7069226  
53 N 36.5538469 30.2515614 35.4028454  
54 C 36.1771776 31.3870299 35.9777046  
55 N 35.0046785 31.4010786 36.6338086  
56 N 36.9656189 32.4748396 35.9565325  
57 O 34.5855087 26.8582187 31.7985819  
58 H 36.1979827 26.1597844 33.7577107  
59 H 37.1419455 28.6985204 32.3022806  
60 H 35.8624099 28.5141529 33.4896672  
61 H 37.7263845 27.9057899 35.2207107  
62 H 38.9079163 28.3180819 33.9795424  
63 H 38.6559518 30.2636602 35.3628883  
64 H 37.8832963 30.6387099 33.8119845  
65 H 35.8816214 29.4820417 35.4940343

66 H 34.4251085 30.5575772 36.5970264  
67 H 34.6315642 32.2765030 36.9926103  
68 H 37.7511829 32.5653371 35.2960422  
69 H 36.6084741 33.3313866 36.3663214  
70 H 37.8006849 24.9327539 32.6160572  
71 H 38.2979034 26.2204158 31.7049245  
72 H 38.7010315 26.0970006 33.3628896  
73 H 39.5572267 34.2330257 31.5141013  
74 H 47.4582633 31.2654700 30.7838703  
75 H 42.4020960 28.6931240 29.0182705

**AO-RC-0.010**

1 C 41.7681682 28.3859612 29.9934711  
2 H 40.7678601 28.8143570 29.8424293  
3 H 41.6611251 27.2950999 29.8828890  
4 C 42.2281858 28.7504343 31.3713308  
5 N 43.3135752 28.2045932 32.0376895  
6 H 43.9361629 27.4547065 31.6999406  
7 C 43.4416954 28.8037921 33.2295744  
8 H 44.2338789 28.5729497 33.9374006  
9 N 42.4801597 29.7155296 33.3991040  
10 C 41.7119185 29.6776592 32.2464335  
11 H 40.8452749 30.3146007 32.1142732  
12 C 40.3106646 34.3398411 32.4261076  
13 H 41.3486451 34.3993831 32.0800218  
14 H 40.0807105 35.2764464 32.9587851  
15 C 40.1109279 33.1934791 33.4264853  
16 O 39.0255850 33.0723756 33.9924342  
17 O 41.1432650 32.4376694 33.6108540  
18 C 47.3676550 32.0229163 31.5123917  
19 H 48.0726741 31.8248743 32.3315714  
20 H 47.6902351 32.9548577 31.0180066  
21 C 45.9813729 32.1692513 32.0480108  
22 N 44.9508432 32.7329034 31.3247296  
23 H 45.0190980 33.1004152 30.3696455  
24 C 43.8228352 32.6554215 32.0503108  
25 H 42.8412071 32.9484309 31.6901215  
26 N 44.0716173 32.1133344 33.2349601  
27 C 45.4154078 31.8041271 33.2501060  
28 H 45.8754506 31.3195050 34.1077485  
29 Fe 42.4938193 31.4636698 34.5571674  
30 O 42.8986527 33.3269005 35.6786058  
31 O 43.1388948 33.2430380 36.9328991  
32 C 42.0974229 30.8921600 37.3232465  
33 O 41.4547190 30.9443402 36.2147199  
34 O 41.6131692 30.7040929 38.4421094  
35 C 43.6182975 31.0722667 37.1242658  
36 O 44.0301841 30.9407427 35.9525512  
37 C 44.5329884 31.0891700 38.3170804  
38 C 45.8545086 31.8364216 38.1315087  
39 C 46.9716106 31.4393192 39.1235952  
40 O 47.9347222 32.2502487 39.2684551  
41 O 46.8762996 30.3233782 39.6826980  
42 H 46.2404229 31.6183675 37.1209796  
43 H 45.7080403 32.9286655 38.1611926  
44 H 43.9558496 31.4517122 39.1810180  
45 H 44.7745982 30.0347552 38.5494649  
46 N 38.0103154 25.9020762 32.7748825

47 C 36.7668747 26.6792984 33.0299505  
48 C 35.9107716 26.6269035 31.7207427  
49 O 36.5494577 26.3304429 30.6866893  
50 C 37.0227417 28.1515395 33.3707651  
51 C 37.9876082 28.4557380 34.5226741  
52 C 37.9316560 29.9169718 34.9571567  
53 N 36.6313018 30.1839120 35.5713145  
54 C 36.1928468 31.3416513 36.0447589  
55 N 34.9919096 31.3700964 36.6451222  
56 N 36.9576919 32.4486151 35.9941300  
57 O 34.7172921 26.9534088 31.8418744  
58 H 36.2271558 26.1804565 33.8468017  
59 H 37.3733583 28.6806508 32.4702104  
60 H 36.0200265 28.5541741 33.5822356  
61 H 37.7853582 27.8123180 35.3973874  
62 H 39.0257627 28.2464289 34.2249915  
63 H 38.7380395 30.1443865 35.6764302  
64 H 38.0760812 30.5844530 34.0904379  
65 H 35.9719258 29.4031401 35.6699160  
66 H 34.4240432 30.5170115 36.6191481  
67 H 34.5873086 32.2581804 36.9289571  
68 H 37.7600494 32.5104303 35.3575267  
69 H 36.5486274 33.3229886 36.3051149  
70 H 37.8138534 24.8793637 32.7979765  
71 H 38.3004618 26.0880424 31.7992726  
72 H 38.7869491 26.0461306 33.4500862  
73 H 39.6561767 34.2462774 31.5595290  
74 H 47.5088824 31.2481080 30.7588706  
75 H 42.4192136 28.7072777 29.1804751

**AO-TS-0.010**

1 C 41.7696098 28.3899525 30.0294756  
2 H 40.7665439 28.8125442 29.8785192  
3 H 41.6676778 27.2977427 29.9263562  
4 C 42.2324585 28.7647560 31.4041404  
5 N 43.3105771 28.2116720 32.0777039  
6 H 43.9297733 27.4576541 31.7433746  
7 C 43.4352945 28.8138959 33.2692670  
8 H 44.2189479 28.5815207 33.9862845  
9 N 42.4806738 29.7337433 33.4297393  
10 C 41.7201662 29.7006603 32.2730481  
11 H 40.8640882 30.3503802 32.1340139  
12 C 40.3325208 34.3315843 32.4583168  
13 H 41.3697823 34.3943598 32.1106397  
14 H 40.1036086 35.2676261 32.9923833  
15 C 40.1402384 33.1836075 33.4630712  
16 O 39.0399317 33.0549985 34.0071900  
17 O 41.1763538 32.4504492 33.6676356  
18 C 47.3615748 32.0272059 31.4889816  
19 H 48.0676288 31.8339207 32.3085959  
20 H 47.6847933 32.9557691 30.9882596  
21 C 45.9769808 32.1780855 32.0278809  
22 N 44.9416351 32.7321872 31.3031893  
23 H 45.0033674 33.0898744 30.3441740  
24 C 43.8166709 32.6581788 32.0354976  
25 H 42.8322431 32.9475745 31.6799983  
26 N 44.0732104 32.1293614 33.2231754  
27 C 45.4168725 31.8243384 33.2361623

28 H 45.8774432 31.3502782 34.0999615  
29 Fe 42.5608593 31.4568774 34.6179718  
30 O 42.8282547 33.3489073 35.7831243  
31 O 43.3468419 32.9674520 37.0555224  
32 C 42.0218169 31.0590852 37.3985004  
33 O 41.3855930 30.9847004 36.3016141  
34 O 41.6144876 30.8241708 38.5339356  
35 C 43.5404679 31.5988631 37.1327678  
36 O 43.9333568 31.0653326 35.9622656  
37 C 44.4851500 31.3432288 38.3209317  
38 C 45.8615170 31.9969388 38.1689035  
39 C 46.9545308 31.5144164 39.1492612  
40 O 47.9597391 32.2757983 39.3039431  
41 O 46.8093803 30.3960762 39.6887296  
42 H 46.2380247 31.7762527 37.1547457  
43 H 45.7999455 33.0973505 38.2261602  
44 H 43.9748317 31.6725453 39.2403259  
45 H 44.6112969 30.2549124 38.4090537  
46 N 38.0383628 25.8969463 32.7749866  
47 C 36.7863868 26.6582142 33.0356323  
48 C 35.9129544 26.5811817 31.7498088  
49 O 36.5100202 26.2932067 30.6923047  
50 C 37.0261357 28.1374649 33.3662761  
51 C 38.0048570 28.4523562 34.5035852  
52 C 37.9537152 29.9162532 34.9294405  
53 N 36.6616092 30.1878042 35.5587335  
54 C 36.2316180 31.3506828 36.0311286  
55 N 35.0351242 31.3827250 36.6410178  
56 N 36.9967362 32.4540487 35.9668064  
57 O 34.7123397 26.8954637 31.8829551  
58 H 36.2694787 26.1547787 33.8649548  
59 H 37.3569050 28.6677653 32.4591354  
60 H 36.0233578 28.5307289 33.5945848  
61 H 37.8122841 27.8152206 35.3847818  
62 H 39.0396289 28.2411075 34.1953588  
63 H 38.7710534 30.1450735 35.6356584  
64 H 38.0884720 30.5800009 34.0586875  
65 H 36.0042599 29.4086116 35.6775931  
66 H 34.4663332 30.5306325 36.6232196  
67 H 34.6358967 32.2706142 36.9335890  
68 H 37.8065015 32.5122206 35.3351318  
69 H 36.5958106 33.3305803 36.2813192  
70 H 37.8493755 24.8715056 32.7603381  
71 H 38.3885844 26.1185758 31.8301567  
72 H 38.7878703 26.0225433 33.4859964  
73 H 39.6767069 34.2402131 31.5925070  
74 H 47.5001326 31.2467112 30.7408527  
75 H 42.4142234 28.7051612 29.2089978

**AO-IM-0.010**

1 C 41.6939319 28.3146594 29.7786149  
2 H 40.7069859 28.7626242 29.6003135  
3 H 41.5764595 27.2317029 29.6181692  
4 C 42.0999793 28.6145522 31.1875585  
5 N 43.1808049 28.0624163 31.8502730  
6 H 43.8320072 27.3444150 31.5040238  
7 C 43.2650886 28.6052186 33.0742645  
8 H 44.0519860 28.3600218 33.7829699

9 N 42.2789127 29.4770626 33.2699107  
 10 C 41.5392666 29.4806732 32.0992623  
 11 H 40.6558319 30.0992812 31.9750223  
 12 C 40.2731182 34.3756887 32.3748124  
 13 H 41.3131040 34.3945564 32.0287920  
 14 H 40.0679863 35.3519295 32.8456057  
 15 C 40.0660910 33.2967215 33.4544821  
 16 O 38.9306376 33.1447857 33.9285073  
 17 O 41.1338608 32.6927519 33.8122422  
 18 C 47.2729854 31.9906261 31.5173498  
 19 H 47.9683145 31.7984673 32.3475583  
 20 H 47.5847279 32.9360865 31.0417694  
 21 C 45.8739837 32.0989280 32.0314817  
 22 N 44.8492968 32.6967980 31.3293533  
 23 H 44.9248498 33.1016971 30.3903094  
 24 C 43.7142966 32.5772635 32.0481858  
 25 H 42.7367315 32.9009158 31.7021719  
 26 N 43.9465238 31.9713030 33.2027461  
 27 C 45.2915210 31.6656607 33.2033826  
 28 H 45.7567070 31.1167140 34.0194627  
 29 Fe 42.2644020 31.1944704 34.4322401  
 30 O 42.3054764 32.4434729 36.5846199  
 31 O 43.5072241 32.2902102 37.3536151  
 32 C 41.2405830 31.5018060 37.1512925  
 33 O 40.8618114 30.7529439 36.2433149  
 34 O 40.9576877 31.6655870 38.3197852  
 35 C 44.2427986 31.2658548 36.8633215  
 36 O 43.8888819 30.5916334 35.9191242  
 37 C 45.5105181 31.0411442 37.6348774  
 38 C 46.1365022 32.2204299 38.3756346  
 39 C 47.3524666 31.7574685 39.2097613  
 40 O 48.2878963 32.5789254 39.3966625  
 41 O 47.3107240 30.5831990 39.6464432  
 42 H 46.4514411 33.0214227 37.6878308  
 43 H 45.3974501 32.6675756 39.0647595  
 44 H 45.3080925 30.2436860 38.3699842  
 45 H 46.2170262 30.5993158 36.9182288  
 46 N 37.9749239 25.9176035 32.6832941  
 47 C 36.7101916 26.6574269 32.9475959  
 48 C 35.8328265 26.5694470 31.6576046  
 49 O 36.4575718 26.2734019 30.6154055  
 50 C 36.9208602 28.1419289 33.2599056  
 51 C 37.9136931 28.5035366 34.3666929  
 52 C 37.8350180 29.9793948 34.7417536  
 53 N 36.5597573 30.2374603 35.4086032  
 54 C 36.1631501 31.3814122 35.9473424  
 55 N 34.9846139 31.4002699 36.5946424  
 56 N 36.9412072 32.4777167 35.9086083  
 57 O 34.6371490 26.8812124 31.7981796  
 58 H 36.2036366 26.1520283 33.7813679  
 59 H 37.2156217 28.6725813 32.3409328  
 60 H 35.9127418 28.5098807 33.5033971  
 61 H 37.7465240 27.8905393 35.2698669  
 62 H 38.9461356 28.2996081 34.0446590  
 63 H 38.6620060 30.2581880 35.4134861  
 64 H 37.9197663 30.6140933 33.8426592  
 65 H 35.8953400 29.4615987 35.5079745  
 66 H 34.4114143 30.5510599 36.5668954

67 H 34.5964835 32.2822747 36.9168405  
 68 H 37.7267056 32.5629743 35.2462836  
 69 H 36.5613523 33.3406593 36.2818830  
 70 H 37.8039713 24.8903567 32.7026604  
 71 H 38.2675744 26.1217022 31.7134808  
 72 H 38.7438587 26.0754265 33.3646550  
 73 H 39.6177481 34.2490738 31.5131129  
 74 H 47.4451318 31.2275384 30.7583176  
 75 H 42.3875915 28.6599500 29.0120134

**BO-RC+0.0025**

1 C 47.6606909 33.0308853 32.4754096  
 2 H 47.4105862 32.4789723 33.3942800  
 3 H 48.7498106 33.1938237 32.4928134  
 4 C 46.8834785 34.3137479 32.4582695  
 5 N 47.0871066 35.3468971 31.5597262  
 6 H 47.8429766 35.4276805 30.8704984  
 7 C 46.1334426 36.2739519 31.7440517  
 8 H 46.0254763 37.1658591 31.1336453  
 9 N 45.3218159 35.9131185 32.7285464  
 10 C 45.7820033 34.6972473 33.1891323  
 11 H 45.2802166 34.1670376 33.9917065  
 12 C 41.0607763 33.3245115 34.4169939  
 13 H 40.9281816 33.2712866 33.3299879  
 14 H 40.0735531 33.5077580 34.8692846  
 15 C 41.9873645 34.4651317 34.8345123  
 16 O 42.0428259 34.7703222 36.0317964  
 17 O 42.6761658 35.0193030 33.9050816  
 18 C 43.3012797 35.0406241 27.4050237  
 19 H 43.2483019 36.0613139 27.0002922  
 20 H 42.5488855 34.4354444 26.8731598  
 21 C 43.0303681 35.0572694 28.8699613  
 22 N 42.5840036 33.9666714 29.5936548  
 23 H 42.3333648 33.0420744 29.2270640  
 24 C 42.5552569 34.3073868 30.8953785  
 25 H 42.2853481 33.6300330 31.6995695  
 26 N 42.9311054 35.5672786 31.0503784  
 27 C 43.2201033 36.0527547 29.7959829  
 28 H 43.5398082 37.0795646 29.6443158  
 29 Fe 43.2898414 36.5589795 32.9152261  
 30 O 41.3860397 37.3439667 32.6587143  
 31 O 41.2368401 38.6036430 32.6237089  
 32 C 43.5028248 39.2454737 33.8021366  
 33 O 43.5582828 38.0434830 34.2595567  
 34 O 43.5572371 40.2853927 34.4554339  
 35 C 43.4233783 39.3062661 32.2650202  
 36 O 43.7452529 38.2510702 31.6833357  
 37 C 43.1939250 40.5998457 31.5641655  
 38 C 42.8612380 40.4742680 30.0851833  
 39 C 42.9304720 41.7964002 29.2817647  
 40 O 43.5754996 42.7534721 29.7836372  
 41 O 42.3628186 41.7580602 28.1684876  
 42 H 43.5732537 39.7828454 29.6000727  
 43 H 41.8649242 40.0282704 29.9388666  
 44 H 42.4288037 41.1569004 32.1278319  
 45 H 44.1023046 41.2203788 31.6809964  
 46 N 49.3197134 37.2067315 37.7843851  
 47 C 48.0802950 36.3804490 37.9147942

48 C 48.4309306 34.8740158 37.8145353  
49 O 49.5536347 34.6012468 37.3364401  
50 C 47.1080028 36.8415687 36.8184927  
51 C 45.7034403 36.2364217 36.8340209  
52 C 44.9723458 36.3832913 38.1674637  
53 N 43.5630177 36.0706582 37.9853351  
54 C 42.6143203 36.2119339 38.9118692  
55 N 42.8904574 36.6859163 40.1377380  
56 N 41.3507059 35.9081228 38.5984502  
57 O 47.5280768 34.0954926 38.1889734  
58 H 47.6763243 36.5917040 38.9162042  
59 H 47.0279782 37.9379966 36.8877005  
60 H 47.5704872 36.6172398 35.8408790  
61 H 45.1174456 36.7426968 36.0488256  
62 H 45.7552831 35.1662908 36.5800485  
63 H 45.4251497 35.7003439 38.9045132  
64 H 45.0780186 37.4091808 38.5641999  
65 H 43.2432802 35.6790929 37.0888973  
66 H 42.1288564 36.6582410 40.8145228  
67 H 43.8488422 36.7103582 40.5020756  
68 H 41.1141505 35.6541195 37.6423867  
69 H 40.6121151 36.0993382 39.2739429  
70 H 50.0755401 36.9006547 38.4158894  
71 H 49.7197469 37.1255764 36.8293496  
72 H 49.1196779 38.2050623 38.0036656  
73 H 41.4733826 32.3788865 34.7685853  
74 H 44.2632849 34.6052263 27.1347611  
75 H 47.4715215 32.3968086 31.6092522

**BO-TS+0.0025**

1 C 47.6563852 33.0375387 32.4786740  
2 H 47.4139315 32.4816891 33.3972374  
3 H 48.7448203 33.2053187 32.4911863  
4 C 46.8713124 34.3165810 32.4693574  
5 N 47.0675848 35.3589024 31.5774302  
6 H 47.8236478 35.4459996 30.8882411  
7 C 46.1099473 36.2793148 31.7687044  
8 H 45.9899672 37.1816364 31.1753472  
9 N 45.3007170 35.9027083 32.7520577  
10 C 45.7683484 34.6868525 33.2043994  
11 H 45.2779063 34.1525733 34.0107380  
12 C 41.0493196 33.3494811 34.4059254  
13 H 40.9040918 33.2892463 33.3208577  
14 H 40.0637507 33.5285830 34.8646534  
15 C 41.9624198 34.5107404 34.8058923  
16 O 42.0739456 34.7797741 36.0091436  
17 O 42.5584413 35.1278122 33.8544949  
18 C 43.2988095 35.0474865 27.4054011  
19 H 43.2487695 36.0677271 26.9993802  
20 H 42.5480715 34.4420862 26.8713885  
21 C 43.0186417 35.0669978 28.8683096  
22 N 42.5740715 33.9739236 29.5911729  
23 H 42.3313563 33.0470852 29.2244934  
24 C 42.5281246 34.3177449 30.8911858  
25 H 42.2541247 33.6428549 31.6960191  
26 N 42.8905785 35.5814831 31.0446375  
27 C 43.1889767 36.0673457 29.7930200  
28 H 43.5020882 37.0985206 29.6514870

29 Fe 43.3165383 36.6227806 32.8576661  
30 O 41.3680167 37.5891383 32.5842913  
31 O 41.6009989 38.9153908 32.3700337  
32 C 43.3717598 39.2520405 33.8680300  
33 O 43.4432475 38.0611833 34.3356777  
34 O 43.5614726 40.3082299 34.4560671  
35 C 42.9894618 39.2270368 32.3107561  
36 O 43.6957497 38.2103218 31.7824255  
37 C 43.0940930 40.5740305 31.5989715  
38 C 42.8089316 40.4646066 30.1050905  
39 C 42.9286518 41.7750026 29.2941314  
40 O 43.5501913 42.7398519 29.8069111  
41 O 42.4096949 41.7278153 28.1553353  
42 H 43.5124626 39.7476357 29.6459247  
43 H 41.8026126 40.0522602 29.9237353  
44 H 42.4023444 41.2764878 32.0892311  
45 H 44.1023820 40.9742044 31.7742749  
46 N 49.3223745 37.2081245 37.7833910  
47 C 48.0825057 36.3826059 37.9139286  
48 C 48.4310964 34.8757346 37.8134839  
49 O 49.5539271 34.6010882 37.3369026  
50 C 47.1109678 36.8458531 36.8178830  
51 C 45.7052434 36.2438309 36.8325600  
52 C 44.9736841 36.3899211 38.1657461  
53 N 43.5647833 36.0775672 37.9811263  
54 C 42.6162819 36.2104811 38.9084733  
55 N 42.8900629 36.6787489 40.1369788  
56 N 41.3536786 35.9026507 38.5930683  
57 O 47.5263420 34.0985706 38.1865342  
58 H 47.6788395 36.5938007 38.9154893  
59 H 47.0336539 37.9422783 36.8878202  
60 H 47.5736030 36.6215917 35.8403699  
61 H 45.1194773 36.7522853 36.0483961  
62 H 45.7543462 35.1738587 36.5773735  
63 H 45.4253787 35.7058115 38.9023862  
64 H 45.0797134 37.4152244 38.5640047  
65 H 43.2460898 35.6929109 37.0807449  
66 H 42.1281388 36.6462635 40.8132036  
67 H 43.8482605 36.7065041 40.5016514  
68 H 41.1195970 35.6583478 37.6338975  
69 H 40.6131407 36.0942611 39.2662876  
70 H 50.0787663 36.9011419 38.4137797  
71 H 49.7211307 37.1284546 36.8276743  
72 H 49.1227413 38.2062438 38.0040157  
73 H 41.4660919 32.4061365 34.7587268  
74 H 44.2613086 34.6107468 27.1390908  
75 H 47.4668506 32.4032673 31.6127389

**BO-IM+0.0025**

1 C 47.6381030 33.0726426 32.4975416  
2 H 47.3978477 32.5240698 33.4211541  
3 H 48.7282102 33.2298050 32.4999403  
4 C 46.8640253 34.3574496 32.4850378  
5 N 47.0490667 35.3801247 31.5721755  
6 H 47.7968218 35.4562765 30.8739526  
7 C 46.0937013 36.3063073 31.7642219  
8 H 45.9778676 37.1963727 31.1518455  
9 N 45.3021555 35.9568166 32.7671002



10 C 45.7753892 34.7481754 33.2326250  
 11 H 45.2946175 34.2223997 34.0520559  
 12 C 40.8581936 33.2695371 34.4881167  
 13 H 40.6364463 33.1579807 33.4195455  
 14 H 39.9011684 33.4197504 35.0139228  
 15 C 41.7422334 34.4848881 34.7702600  
 16 O 41.9630335 34.7909842 35.9548380  
 17 O 42.1747828 35.0947927 33.7403990  
 18 C 43.3040921 35.1547307 27.4430748  
 19 H 43.2761471 36.1688225 27.0192899  
 20 H 42.5391790 34.5587755 26.9184667  
 21 C 43.0116881 35.2022387 28.9040500  
 22 N 42.5079546 34.1358612 29.6242638  
 23 H 42.2727951 33.2038983 29.2661834  
 24 C 42.4065544 34.5111244 30.9152185  
 25 H 42.0740743 33.8627227 31.7197105  
 26 N 42.7941682 35.7685255 31.0732127  
 27 C 43.1692288 36.2127615 29.8244599  
 28 H 43.5303498 37.2249736 29.6574594  
 29 Fe 43.3013410 36.5598450 33.0412234  
 30 O 42.0539796 38.3553228 33.6845702  
 31 O 41.8600828 39.4196197 32.7574585  
 32 C 43.1462013 38.7250554 34.6450776  
 33 O 43.6590528 37.6635176 35.0132156  
 34 O 43.3381577 39.9118012 34.8204236  
 35 C 42.9245703 39.5000611 31.9258354  
 36 O 43.8021726 38.6516495 31.9254846  
 37 C 42.8309211 40.7254824 31.0879062  
 38 C 43.0121849 40.4570144 29.6008438  
 39 C 43.0325806 41.7807233 28.8032695  
 40 O 43.5344916 42.7771731 29.3836733  
 41 O 42.5627579 41.7113709 27.6512573  
 42 H 43.9716870 39.9367915 29.4309993  
 43 H 42.2132642 39.8141254 29.2016388  
 44 H 41.8742622 41.2268301 31.2949495  
 45 H 43.6247220 41.4211082 31.4109468  
 46 N 49.3278287 37.1721792 37.7783578  
 47 C 48.1190115 36.3082943 37.9480391  
 48 C 48.5180570 34.8141676 37.8828085  
 49 O 49.6260693 34.5651505 37.3582085  
 50 C 47.1239149 36.6792431 36.8396322  
 51 C 45.7591496 35.9916866 36.8826905  
 52 C 44.9739836 36.2548657 38.1666397  
 53 N 43.5694646 35.9267841 37.9678192  
 54 C 42.6122347 36.0953629 38.8806212  
 55 N 42.8839104 36.5745813 40.1068481  
 56 N 41.3466668 35.8102867 38.5555027  
 57 O 47.6581130 34.0187080 38.3138499  
 58 H 47.7128866 36.5362513 38.9448011  
 59 H 46.9753632 37.7714943 36.8639093  
 60 H 47.6005992 36.4438694 35.8713139  
 61 H 45.1785328 36.3821531 36.0360960  
 62 H 45.8786450 34.9056342 36.7519127  
 63 H 45.3918507 35.6453251 38.9841094  
 64 H 45.0702633 37.3138073 38.4703261  
 65 H 43.2438585 35.6214909 37.0401600  
 66 H 42.1207078 36.5452793 40.7822065  
 67 H 43.8408007 36.6061701 40.4737378

68 H 41.1320610 35.5426159 37.5950596  
 69 H 40.6011411 36.0413904 39.2095795  
 70 H 50.1050608 36.9033304 38.4011825  
 71 H 49.7131744 37.0862494 36.8177263  
 72 H 49.1019788 38.1693281 37.9785433  
 73 H 41.3531134 32.3626902 34.8356083  
 74 H 44.2531860 34.6905014 27.1751587  
 75 H 47.4336723 32.4370328 31.6359875

**BO-RC+0.0050**

1 C 47.5150222 33.0492335 32.5233247  
 2 H 47.2516888 32.4946061 33.4369420  
 3 H 48.6069656 33.1999012 32.5455580  
 4 C 46.7540349 34.3387556 32.5080607  
 5 N 46.9827257 35.3784316 31.6236478  
 6 H 47.7528016 35.4575120 30.9525812  
 7 C 46.0208027 36.3035521 31.7975263  
 8 H 45.9178254 37.2003593 31.1929174  
 9 N 45.1894344 35.9318929 32.7565827  
 10 C 45.6336489 34.7134689 33.2134260  
 11 H 45.1010018 34.1708732 33.9883679  
 12 C 40.9509419 33.3217787 34.4873215  
 13 H 40.7829802 33.2459680 33.4063901  
 14 H 39.9754540 33.4976473 34.9667166  
 15 C 41.8825832 34.4766233 34.8528886  
 16 O 41.9854985 34.7927915 36.0463930  
 17 O 42.5372502 35.0160386 33.8925333  
 18 C 43.2765344 35.0811111 27.4052593  
 19 H 43.2421974 36.1006956 26.9956705  
 20 H 42.5254394 34.4862396 26.8605552  
 21 C 42.9714150 35.1037251 28.8643587  
 22 N 42.4587063 34.0301156 29.5695824  
 23 H 42.1849049 33.1149594 29.1958066  
 24 C 42.3947607 34.3705576 30.8697426  
 25 H 42.0584926 33.7061785 31.6596343  
 26 N 42.8156810 35.6138828 31.0431894  
 27 C 43.1662774 36.0899392 29.7998158  
 28 H 43.5134072 37.1095430 29.6590691  
 29 Fe 43.1350743 36.5917297 32.9241194  
 30 O 41.2969763 37.4299511 32.6748765  
 31 O 41.1683178 38.6833182 32.6854317  
 32 C 43.5194665 39.2584146 33.8359950  
 33 O 43.5066192 38.0508348 34.2845944  
 34 O 43.6664997 40.2869014 34.4904290  
 35 C 43.4174727 39.3404080 32.2977784  
 36 O 43.6824191 38.2735530 31.7100085  
 37 C 43.2134020 40.6365226 31.6038434  
 38 C 42.8730654 40.5150001 30.1265798  
 39 C 43.1051065 41.7971214 29.2885651  
 40 O 43.6919204 42.7643838 29.8383706  
 41 O 42.7093495 41.7092074 28.1086966  
 42 H 43.4870269 39.7282905 29.6549799  
 43 H 41.8272731 40.1983148 29.9867519  
 44 H 42.4657837 41.2126641 32.1728439  
 45 H 44.1325054 41.2442080 31.7166158  
 46 N 49.2292689 37.2766898 37.7076733  
 47 C 48.0084744 36.4216092 37.8535929  
 48 C 48.3983800 34.9250649 37.7920379

49 O 49.5455592 34.6580633 37.3601895  
50 C 47.0233568 36.8481090 36.7527787  
51 C 45.6156927 36.2528027 36.7950836  
52 C 44.8826829 36.4626248 38.1191812  
53 N 43.4736781 36.1600393 37.9473672  
54 C 42.5319122 36.3326347 38.8812850  
55 N 42.8327376 36.8010980 40.1019547  
56 N 41.2629692 36.0514833 38.5812822  
57 O 47.5061607 34.1331227 38.1599665  
58 H 47.6002972 36.6405724 38.8518837  
59 H 46.9453126 37.9459474 36.7954821  
60 H 47.4800033 36.6046368 35.7772123  
61 H 45.0344964 36.7350287 35.9915925  
62 H 45.6562993 35.1738700 36.5786144  
63 H 45.3277809 35.8106773 38.8910192  
64 H 45.0040981 37.5024321 38.4729291  
65 H 43.1389961 35.7640286 37.0562419  
66 H 42.0709854 36.8161240 40.7818052  
67 H 43.7929619 36.8220342 40.4563664  
68 H 40.9959266 35.8466012 37.6212895  
69 H 40.5334339 36.2612754 39.2640988  
70 H 50.0085195 36.9632128 38.3049611  
71 H 49.5895866 37.2278850 36.7355984  
72 H 49.0154873 38.2661481 37.9563442  
73 H 41.3948613 32.3915461 34.8418213  
74 H 44.2363144 34.6296156 27.1541787  
75 H 47.3176194 32.4242572 31.6524034

**BO-TS+0.0050**

1 C 47.4666737 33.0923882 32.5386922  
2 H 47.2088035 32.5341090 33.4516638  
3 H 48.5562308 33.2574578 32.5654884  
4 C 46.6880490 34.3716012 32.5263308  
5 N 46.9202516 35.4358801 31.6705549  
6 H 47.6967580 35.5306531 31.0089786  
7 C 45.9461927 36.3488031 31.8566320  
8 H 45.8317502 37.2693294 31.2901700  
9 N 45.1042787 35.9413940 32.7918021  
10 C 45.5530847 34.7176106 33.2233700  
11 H 45.0205071 34.1549531 33.9831806  
12 C 40.9202005 33.3360133 34.4743530  
13 H 40.7368991 33.2538639 33.3961961  
14 H 39.9483057 33.5056319 34.9642268  
15 C 41.8407102 34.5090146 34.8186986  
16 O 42.0045939 34.7938429 36.0146407  
17 O 42.4063196 35.1005414 33.8357139  
18 C 43.2688658 35.0847108 27.3882690  
19 H 43.2368192 36.1032067 26.9758159  
20 H 42.5227798 34.4873523 26.8392968  
21 C 42.9511768 35.1088773 28.8443610  
22 N 42.4323037 34.0329352 29.5421210  
23 H 42.1692597 33.1158596 29.1659212  
24 C 42.3505252 34.3714491 30.8417790  
25 H 42.0049379 33.7064113 31.6269632  
26 N 42.7653627 35.6151850 31.0196112  
27 C 43.1324827 36.0943222 29.7836642  
28 H 43.4853318 37.1146996 29.6590781  
29 Fe 43.0604273 36.6650107 32.8540507

30 O 41.3398333 37.6643198 32.7182761  
31 O 41.6042995 39.0167865 32.5420251  
32 C 43.4757705 39.2690939 33.9231374  
33 O 43.5249764 38.0824321 34.3686373  
34 O 43.7393648 40.3281971 34.4733987  
35 C 42.9765549 39.2675420 32.3526174  
36 O 43.6213911 38.2398871 31.7941587  
37 C 43.1181460 40.6283715 31.6691434  
38 C 42.7704265 40.5365026 30.1864476  
39 C 43.0757744 41.7904002 29.3563488  
40 O 43.6388906 42.7770386 29.8863032  
41 O 42.7492102 41.7017628 28.1480173  
42 H 43.3282174 39.7084198 29.7175270  
43 H 41.7034688 40.2925466 30.0516415  
44 H 42.4805572 41.3526616 32.1958791  
45 H 44.1528668 40.9674322 31.8107688  
46 N 49.2277077 37.2789619 37.7020083  
47 C 48.0057562 36.4247765 37.8448130  
48 C 48.3960206 34.9284106 37.7876270  
49 O 49.5450724 34.6605297 37.3608365  
50 C 47.0251563 36.8504968 36.7395595  
51 C 45.6168569 36.2563391 36.7763348  
52 C 44.8802882 36.4636950 38.0986899  
53 N 43.4723212 36.1569945 37.9249767  
54 C 42.5318849 36.3189258 38.8614073  
55 N 42.8313895 36.7856534 40.0833595  
56 N 41.2641094 36.0273876 38.5644555  
57 O 47.5032062 34.1366684 38.1545013  
58 H 47.5941694 36.6449524 38.8415009  
59 H 46.9485457 37.9484559 36.7799339  
60 H 47.4859227 36.6076169 35.7660217  
61 H 45.0388402 36.7408305 36.9719773  
62 H 45.6569277 35.1778567 36.5579437  
63 H 45.3251697 35.8127152 38.8715460  
64 H 44.9983308 37.5037700 38.4529082  
65 H 43.1381953 35.7675985 37.0298480  
66 H 42.0704755 36.7932006 40.7643068  
67 H 43.7917315 36.8108475 40.4369197  
68 H 40.9974199 35.8328462 37.6019789  
69 H 40.5341360 36.2410278 39.2455181  
70 H 50.0082936 36.9585553 38.2937364  
71 H 49.5839783 37.2375824 36.7279913  
72 H 49.0163253 38.2667576 37.9581795  
73 H 41.3728990 32.4096208 34.8278049  
74 H 44.2307137 34.6334717 27.1447553  
75 H 47.2829772 32.4609799 31.6694130

**BO-IM+0.0050**

1 C 47.4999831 33.0945562 32.5553578  
2 H 47.2662352 32.5439588 33.4791825  
3 H 48.5834771 33.2942121 32.5672318  
4 C 46.6808022 34.3469827 32.5023062  
5 N 46.9609328 35.4232608 31.6820527  
6 H 47.7893671 35.5411045 31.0919227  
7 C 45.9281099 36.2892963 31.7599619  
8 H 45.8663612 37.2161007 31.1959125  
9 N 45.0044944 35.8363628 32.5836014  
10 C 45.4535605 34.6323887 33.0617913

11 H 44.8652312 34.0331940 33.7523542  
12 C 40.8725336 33.4330151 34.5240518  
13 H 40.5877478 33.2797105 33.4757038  
14 H 39.9517593 33.6596598 35.0839158  
15 C 41.8335659 34.6182227 34.7044522  
16 O 42.0804537 34.9820765 35.8648728  
17 O 42.3239324 35.1159609 33.6360943  
18 C 43.2877832 35.0438910 27.3565935  
19 H 43.2513211 36.0543705 26.9241362  
20 H 42.5548814 34.4318887 26.8057103  
21 C 42.9463408 35.0996666 28.8063945  
22 N 42.4051146 34.0554051 29.5316029  
23 H 42.1502594 33.1251025 29.1829911  
24 C 42.2699092 34.4594789 30.8115552  
25 H 41.8926066 33.8348275 31.6144816  
26 N 42.6746535 35.7102343 30.9530551  
27 C 43.0941512 36.1223399 29.7098983  
28 H 43.4684970 37.1269537 29.5378470  
29 Fe 43.0572939 36.8107862 32.8394724  
30 O 42.1028175 38.0749418 34.0521759  
31 O 40.6676085 38.1882426 31.2914266  
32 C 43.2023602 38.7526168 34.3017539  
33 O 44.2690416 38.0730921 33.9257018  
34 O 43.2427989 39.8875148 34.7773084  
35 C 41.7278035 38.7900170 31.1386434  
36 O 42.8915590 38.4023384 31.4727735  
37 C 41.6012217 40.1535419 30.3801943  
38 C 42.7249672 41.0858349 30.7600080  
39 C 42.9753577 42.1527608 29.5901917  
40 O 43.5398136 43.1682535 30.0503146  
41 O 42.6637255 41.8597212 28.4367160  
42 H 42.5540156 41.6071868 31.7103273  
43 H 43.6817307 40.5471299 30.8378545  
44 H 41.6488252 39.8968705 29.3093991  
45 H 40.6074643 40.5775403 30.5745520  
46 N 49.2440572 37.2877377 37.7269844  
47 C 48.0258102 36.4271513 37.8595531  
48 C 48.4259302 34.9341396 37.8205477  
49 O 49.5715925 34.6685323 37.3832391  
50 C 47.0593745 36.8311086 36.7343063  
51 C 45.6560169 36.2259775 36.7635579  
52 C 44.8992865 36.4750975 38.0687116  
53 N 43.4893955 36.1813625 37.8836638  
54 C 42.5507026 36.3056429 38.8264132  
55 N 42.8478635 36.7263931 40.0649396  
56 N 41.2820764 36.0093632 38.5244438  
57 O 47.5419780 34.1417770 38.2062044  
58 H 47.5975945 36.6543483 38.8475308  
59 H 46.9727696 37.9289082 36.7551887  
60 H 47.5346407 36.5784535 35.7706015  
61 H 45.0998992 36.6779463 35.9248299  
62 H 45.7068706 35.1408699 36.5826712  
63 H 45.3220933 35.8359317 38.8636824  
64 H 45.0280264 37.5211781 38.4020661  
65 H 43.1545672 35.8540590 36.9629290  
66 H 42.0873608 36.7125709 40.7464138  
67 H 43.8089653 36.7669558 40.4146146  
68 H 41.0156512 35.8998755 37.5473510

69 H 40.5513997 36.2436773 39.1982971  
70 H 50.0179553 36.9783325 38.3326331  
71 H 49.6145076 37.2450321 36.7581820  
72 H 49.0209571 38.2758115 37.9722124  
73 H 41.3360170 32.5193819 34.8962409  
74 H 44.2570687 34.5997257 27.1301644  
75 H 47.3165559 32.4514858 31.6946128

**BO-RC+0.0075**

1 C 47.4122754 33.1637061 32.5545452  
2 H 47.1717293 32.6150168 33.4780649  
3 H 48.4989296 33.3498083 32.5629593  
4 C 46.6111676 34.4279928 32.5186813  
5 N 46.8566403 35.4873062 31.6629057  
6 H 47.6514516 35.5834382 31.0245693  
7 C 45.8487559 36.3750861 31.7971275  
8 H 45.7512271 37.2821252 31.2048930  
9 N 44.9784821 35.9606197 32.6996035  
10 C 45.4358926 34.7502480 33.1606246  
11 H 44.8737711 34.1684352 33.8877481  
12 C 40.8447525 33.2950892 34.5567025  
13 H 40.5924801 33.1445947 33.4988411  
14 H 39.9039814 33.4989510 35.0914702  
15 C 41.7943724 34.4822090 34.7720976  
16 O 42.0008675 34.8399438 35.9506254  
17 O 42.3271659 34.9867988 33.7373947  
18 C 43.2405715 35.1463688 27.3768418  
19 H 43.2234133 36.1542063 26.9385789  
20 H 42.5032137 34.5418060 26.8235979  
21 C 42.8779349 35.2129480 28.8215598  
22 N 42.3648418 34.1469708 29.5390444  
23 H 42.1401757 33.2102581 29.1862222  
24 C 42.1976662 34.5386276 30.8150535  
25 H 41.8432162 33.8955447 31.6141910  
26 N 42.5531937 35.8067567 30.9648949  
27 C 42.9705300 36.2447072 29.7256838  
28 H 43.2839770 37.2730386 29.5633720  
29 Fe 42.9563402 36.7161651 32.8594869  
30 O 40.9929902 37.4915102 32.9816395  
31 O 40.0205095 37.0962283 32.3670600  
32 C 43.4634856 39.3897328 33.8115157  
33 O 43.4125484 38.1709455 34.2024862  
34 O 43.7664441 40.3707713 34.4888732  
35 C 43.1588880 39.5849832 32.3003901  
36 O 43.3251475 38.5772050 31.6058931  
37 C 42.7161322 40.9043019 31.8085621  
38 C 42.1496223 40.9576925 30.3929284  
39 C 42.9753880 41.8581971 29.4372558  
40 O 43.7510587 42.7023143 29.9639430  
41 O 42.7720505 41.6798478 28.2204624  
42 H 42.0598121 39.9605617 29.9385962  
43 H 41.1304888 41.3780853 30.4116108  
44 H 42.0521616 41.3238155 32.5844043  
45 H 43.5888972 41.6020865 31.8243614  
46 N 49.1958453 37.2998954 37.7175440  
47 C 47.9997409 36.4054484 37.8405518  
48 C 48.4391641 34.9213656 37.8184672  
49 O 49.6189471 34.6742235 37.4562875

50 C 47.0273031 36.7898315 36.7108400  
51 C 45.6220782 36.1863078 36.7499038  
52 C 44.8728313 36.4234369 38.0604737  
53 N 43.4711518 36.0971944 37.8911960  
54 C 42.5263178 36.3008796 38.8181883  
55 N 42.8272235 36.7960200 40.0281137  
56 N 41.2584256 36.0137110 38.5218392  
57 O 47.5541599 34.1089862 38.1515677  
58 H 47.5582045 36.6226109 38.8251521  
59 H 46.9397326 37.8880613 36.7212959  
60 H 47.5019937 36.5304019 35.7484856  
61 H 45.0484518 36.6480536 35.9291247  
62 H 45.6677434 35.1037706 36.5538065  
63 H 45.3208409 35.8017965 38.8565376  
64 H 44.9823151 37.4748090 38.3842124  
65 H 43.1293151 35.7225813 36.9887780  
66 H 42.0597402 36.8562022 40.7005229  
67 H 43.7853116 36.8341758 40.3829636  
68 H 41.0020494 35.8053575 37.5576320  
69 H 40.5230748 36.2836379 39.1779012  
70 H 49.9783997 36.9942612 38.3120467  
71 H 49.5599090 37.2813344 36.7457853  
72 H 48.9584340 38.2804029 37.9818122  
73 H 41.3223815 32.3917422 34.9360465  
74 H 44.2034036 34.6835678 27.1604239  
75 H 47.2266259 32.5174951 31.6966333

**BO-TS+0.0075**

1 C 47.4657039 33.0739205 32.5660306  
2 H 47.2409077 32.4994607 33.4777741  
3 H 48.5526706 33.2596460 32.5623606  
4 C 46.6645295 34.3377188 32.5787940  
5 N 46.9177644 35.4388601 31.7787833  
6 H 47.7149355 35.5632644 31.1481833  
7 C 45.9083815 36.3200271 31.9492922  
8 H 45.7989196 37.2628048 31.4191145  
9 N 45.0282970 35.8553144 32.8166327  
10 C 45.4809716 34.6250668 33.2215803  
11 H 44.9168630 34.0087096 33.9179175  
12 C 40.8367091 33.2963665 34.5665798  
13 H 40.6015692 33.1575159 33.5039804  
14 H 39.8888904 33.4887885 35.0927645  
15 C 41.7765865 34.4822646 34.8062479  
16 O 41.9682127 34.8427481 35.9791915  
17 O 42.3394303 34.9834932 33.7756829  
18 C 43.2523783 35.0832078 27.3771069  
19 H 43.2231985 36.1019084 26.9644703  
20 H 42.5114294 34.4878023 26.8194396  
21 C 42.9177853 35.1054702 28.8297161  
22 N 42.3669976 34.0366293 29.5125864  
23 H 42.0892295 33.1280761 29.1266723  
24 C 42.2647063 34.3723613 30.8116368  
25 H 41.8838196 33.7159673 31.5875702  
26 N 42.7016743 35.6056129 31.0043801  
27 C 43.1026956 36.0817942 29.7783835  
28 H 43.4762654 37.0959009 29.6654020  
29 Fe 42.9701227 36.6260194 32.8573251  
30 O 41.3421154 37.6336817 32.9033160

31 O 41.6352180 39.0445376 32.6590635  
32 C 43.6104688 39.2140288 33.9805026  
33 O 43.6401938 38.0310358 34.4008803  
34 O 43.9499271 40.2717290 34.4875517  
35 C 42.9524045 39.2438152 32.4013462  
36 O 43.5784867 38.2258257 31.8127415  
37 C 43.1246140 40.6280993 31.7613126  
38 C 42.5815938 40.6211543 30.3306248  
39 C 43.0130087 41.8133677 29.4741083  
40 O 43.6405874 42.7751501 29.9692596  
41 O 42.7046536 41.7184550 28.2588110  
42 H 42.9079631 39.7110423 29.8021265  
43 H 41.4796663 40.5889002 30.3354265  
44 H 42.6231758 41.3786920 32.3862705  
45 H 44.1969936 40.8611252 31.7766444  
46 N 49.1989109 37.3003428 37.7235395  
47 C 48.0037769 36.4045512 37.8484646  
48 C 48.4445306 34.9210536 37.8293376  
49 O 49.6238978 34.6735196 37.4657112  
50 C 47.0313924 36.7839823 36.7173099  
51 C 45.6252756 36.1839435 36.7592781  
52 C 44.8748680 36.4381257 38.0660607  
53 N 43.4681418 36.1336190 37.8937539  
54 C 42.5246352 36.3460043 38.8203846  
55 N 42.8337471 36.8257007 40.0343218  
56 N 41.2519380 36.0842305 38.5217005  
57 O 47.5605514 34.1088980 38.1655202  
58 H 47.5616186 36.6231339 38.8324931  
59 H 46.9440836 37.8823202 36.7211121  
60 H 47.5051918 36.5194247 35.7559727  
61 H 45.0567439 36.6431058 35.9337603  
62 H 45.6691078 35.0994094 36.5740443  
63 H 45.3088449 35.8141203 38.8681026  
64 H 44.9986688 37.4893308 38.3850950  
65 H 43.1242741 35.7676897 36.9913876  
66 H 42.0678770 36.8915324 40.7080000  
67 H 43.7925658 36.8491382 40.3882776  
68 H 40.9839739 35.8950273 37.5573274  
69 H 40.5230661 36.3536669 39.1853399  
70 H 49.9831465 36.9953711 38.3160694  
71 H 49.5606003 37.2830829 36.7508289  
72 H 48.9611197 38.2803728 37.9882872  
73 H 41.3186128 32.3939185 34.9426429  
74 H 44.2165228 34.6310063 27.1447144  
75 H 47.2616578 32.4544286 31.6927253

**BO-IM+0.0075**

1 C 47.4610842 33.1020417 32.5508201  
2 H 47.2320617 32.5446484 33.4719037  
3 H 48.5499804 33.2750117 32.5396192  
4 C 46.6723812 34.3738724 32.5443349  
5 N 46.9003861 35.4346712 31.6865379  
6 H 47.6836055 35.5339629 31.0345310  
7 C 45.8991535 36.3253585 31.8442938  
8 H 45.7915292 37.2403182 31.2666947  
9 N 45.0494431 35.9099796 32.7655428  
10 C 45.5140087 34.6982073 33.2148633  
11 H 44.9745267 34.1145653 33.9582101

12 C 40.7506150 33.2373621 34.5961390  
 13 H 40.4962432 33.0752490 33.5409692  
 14 H 39.8061934 33.3941459 35.1410197  
 15 C 41.6395591 34.4687144 34.7990343  
 16 O 41.8966705 34.8146620 35.9680364  
 17 O 42.0707705 35.0253174 33.7399099  
 18 C 43.2524769 35.2082253 27.4526948  
 19 H 43.2465042 36.2221477 27.0274239  
 20 H 42.4947681 34.6255952 26.9038136  
 21 C 42.9032012 35.2588829 28.9024791  
 22 N 42.3331037 34.2050915 29.5925926  
 23 H 42.0802229 33.2832486 29.2201835  
 24 C 42.1631026 34.5835494 30.8739047  
 25 H 41.7587975 33.9467092 31.6538025  
 26 N 42.5758048 35.8300477 31.0576632  
 27 C 43.0331194 36.2658738 29.8313983  
 28 H 43.4047913 37.2769977 29.6837263  
 29 Fe 43.0520318 36.6124562 33.0252496  
 30 O 42.0830303 38.4506989 33.8406347  
 31 O 41.8742944 39.5342267 32.9355171  
 32 C 43.2820927 38.7144682 34.6846206  
 33 O 43.7380240 37.6034471 34.9930922  
 34 O 43.6014924 39.8735301 34.8490624  
 35 C 42.8300393 39.5215114 31.9831325  
 36 O 43.6505528 38.6091231 31.9265137  
 37 C 42.7226669 40.7145004 31.1098079  
 38 C 42.9581381 40.4136376 29.6379178  
 39 C 43.2034145 41.7157112 28.8317346  
 40 O 43.6722726 42.6937500 29.4679148  
 41 O 42.9433296 41.6287969 27.6192544  
 42 H 43.8573206 39.7814694 29.5214838  
 43 H 42.1134622 39.8730465 29.1860295  
 44 H 41.7558204 41.2091502 31.2870985  
 45 H 43.4956913 41.4419886 31.4252517  
 46 N 49.2068306 37.2746592 37.6654103  
 47 C 48.0650568 36.3254616 37.8700590  
 48 C 48.5745114 34.8663668 37.9106622  
 49 O 49.7366923 34.6460409 37.4798292  
 50 C 47.0523183 36.5607255 36.7359672  
 51 C 45.6923364 35.8743580 36.8652800  
 52 C 44.8898465 36.3312470 38.0833796  
 53 N 43.4926708 35.9735960 37.9270362  
 54 C 42.5402448 36.2493568 38.8298646  
 55 N 42.8443734 36.7605524 40.0331145  
 56 N 41.2662338 36.0183614 38.5153103  
 57 O 47.7475587 34.0394951 38.3387551  
 58 H 47.6291627 36.5746010 38.8492481  
 59 H 46.8869464 37.6477643 36.6478789  
 60 H 47.5272893 36.2432651 35.7907870  
 61 H 45.1226334 36.1429319 35.9653322  
 62 H 45.8135718 34.7807680 36.8884802  
 63 H 45.2975348 35.8649122 38.9966246  
 64 H 44.9926836 37.4246563 38.2150626  
 65 H 43.1418763 35.6848235 37.0007290  
 66 H 42.0747473 36.8382282 40.7018343  
 67 H 43.7998337 36.7739271 40.3969643  
 68 H 41.0217293 35.7742908 37.5556921  
 69 H 40.5299419 36.3207542 39.1553765

70 H 50.0395834 37.0128776 38.2129033  
 71 H 49.5146785 37.2624107 36.6745302  
 72 H 48.9430853 38.2483137 37.9313901  
 73 H 41.2783331 32.3596064 34.9691346  
 74 H 44.2009531 34.7280355 27.2121167  
 75 H 47.2465193 32.4716537 31.6878948

**BO-RC+0.010**

1 C 47.3593412 33.1997433 32.5331963  
 2 H 47.1029610 32.6572265 33.4559227  
 3 H 48.4474692 33.3805373 32.5542876  
 4 C 46.5633397 34.4665541 32.4826295  
 5 N 46.8131582 35.5188109 31.6183693  
 6 H 47.6058679 35.6056945 30.9780291  
 7 C 45.8057967 36.4106134 31.7466521  
 8 H 45.7098145 37.3141117 31.1482147  
 9 N 44.9356295 36.0056818 32.6515846  
 10 C 45.3879908 34.7977559 33.1205905  
 11 H 44.8191768 34.2228365 33.8479320  
 12 C 40.8200582 33.3320284 34.4884497  
 13 H 40.5924187 33.1961238 33.4233105  
 14 H 39.8660889 33.5328551 35.0006889  
 15 C 41.7679484 34.5116633 34.7415071  
 16 O 41.9694744 34.8335355 35.9337741  
 17 O 42.3085565 35.0453723 33.7284401  
 18 C 43.2243410 35.1603539 27.3540350  
 19 H 43.2088366 36.1652199 26.9090549  
 20 H 42.4897607 34.5533062 26.7997796  
 21 C 42.8506749 35.2367937 28.7956423  
 22 N 42.3380523 34.1729414 29.5172296  
 23 H 42.1120087 33.2353600 29.1680766  
 24 C 42.1561260 34.5747747 30.7882820  
 25 H 41.7952629 33.9362583 31.5881875  
 26 N 42.5018782 35.8460594 30.9309263  
 27 C 42.9270996 36.2771688 29.6920027  
 28 H 43.2280632 37.3086618 29.5232561  
 29 Fe 42.9000590 36.7725375 32.8182507  
 30 O 40.8917741 37.5447553 32.9529936  
 31 O 39.9292108 37.1783351 32.3137354  
 32 C 43.4512653 39.4196241 33.8037807  
 33 O 43.3817086 38.1987946 34.1868393  
 34 O 43.8170849 40.3827879 34.4770394  
 35 C 43.0879979 39.6361900 32.3087894  
 36 O 43.2352339 38.6370912 31.5949834  
 37 C 42.6148099 40.9561856 31.8558302  
 38 C 42.0771239 41.0525328 30.4331340  
 39 C 43.0015968 41.8725339 29.4960217  
 40 O 43.7993243 42.6845017 30.0415631  
 41 O 42.8513050 41.6803603 28.2734810  
 42 H 41.8930928 40.0678133 29.9805315  
 43 H 41.1052924 41.5732696 30.4392950  
 44 H 41.9201704 41.3196001 32.6351387  
 45 H 43.4671245 41.6763115 31.9195490  
 46 N 49.1650432 37.3019823 37.6480296  
 47 C 47.9934019 36.3746723 37.7882555  
 48 C 48.4758325 34.9042354 37.8015216  
 49 O 49.6632348 34.6773852 37.4390073

50 C 47.0120132 36.7093395 36.6490552  
51 C 45.6161623 36.0867529 36.7088914  
52 C 44.8672004 36.3611151 38.0122565  
53 N 43.4662848 36.0367339 37.8548687  
54 C 42.5239073 36.3141845 38.7665146  
55 N 42.8439139 36.8292171 39.9638139  
56 N 41.2472979 36.0807584 38.4673432  
57 O 47.6200991 34.0753024 38.1612062  
58 H 47.5431264 36.5989805 38.7671716  
59 H 46.9035915 37.8060711 36.6299640  
60 H 47.4900011 36.4323321 35.6931294  
61 H 45.0369247 36.5174105 35.8753906  
62 H 45.6729766 34.9993553 36.5445709  
63 H 45.3160229 35.7629036 38.8271022  
64 H 44.9825525 37.4217577 38.3044784  
65 H 43.1085643 35.6649370 36.9537687  
66 H 42.0761252 36.9661103 40.6254788  
67 H 43.8008836 36.8416476 40.3191827  
68 H 40.9878372 35.8566498 37.5065782  
69 H 40.5184667 36.4113981 39.1029767  
70 H 49.9735348 36.9950519 38.2059926  
71 H 49.4923586 37.3141801 36.6635251  
72 H 48.9166496 38.2722966 37.9404483  
73 H 41.2874659 32.4235880 34.8683617  
74 H 44.1880143 34.6956202 27.1456518  
75 H 47.1852374 32.5457939 31.6787343

**BO-TS+0.010**

1 C 47.4537906 33.0695252 32.5206660  
2 H 47.2149317 32.5013708 33.4323471  
3 H 48.5444351 33.2365702 32.5210917  
4 C 46.6693535 34.3426857 32.5349444  
5 N 46.9104930 35.4295151 31.7126463  
6 H 47.7028193 35.5501669 31.0772952  
7 C 45.8967998 36.3109956 31.8838708  
8 H 45.7857680 37.2483866 31.3423394  
9 N 45.0306719 35.8637802 32.7715530  
10 C 45.4878488 34.6379675 33.1815311  
11 H 44.9158318 34.0309887 33.8807615  
12 C 40.8544103 33.3456874 34.5067886  
13 H 40.6491501 33.2356755 33.4345629  
14 H 39.9004347 33.5654578 35.0059082  
15 C 41.8278245 34.4808058 34.8045594  
16 O 41.9512126 34.8559425 35.9921262  
17 O 42.5064379 34.9008975 33.8247995  
18 C 43.2226597 35.0997374 27.3927951  
19 H 43.1891163 36.1189374 26.9815335  
20 H 42.4752700 34.5084160 26.8407436  
21 C 42.8805863 35.1215429 28.8384825  
22 N 42.3468514 34.0431668 29.5199194  
23 H 42.0921556 33.1282240 29.1405584  
24 C 42.2050503 34.3871304 30.8115991  
25 H 41.8393684 33.7342267 31.5996458  
26 N 42.5951399 35.6338240 30.9887564  
27 C 43.0221391 36.1115753 29.7776268  
28 H 43.3785085 37.1345798 29.6713063  
29 Fe 42.8611333 36.5380079 32.7859525

30 O 41.5353673 37.7794152 33.3710486  
31 O 41.7697896 39.1547018 32.8603060  
32 C 43.9512572 39.2135749 34.2870548  
33 O 43.9765566 38.0807864 34.4885462  
34 O 44.1513852 40.3773179 34.4177663  
35 C 42.9165923 39.2665917 32.2297527  
36 O 43.5719078 38.2694833 31.8331523  
37 C 43.2189913 40.6572002 31.7779006  
38 C 42.4425791 40.7826351 30.4595349  
39 C 42.9499708 41.9319526 29.5516739  
40 O 43.6342871 42.8487876 30.0635175  
41 O 42.5888054 41.7928427 28.3654066  
42 H 42.5010193 39.8426129 29.8876932  
43 H 41.3812185 40.9495215 30.7029778  
44 H 42.8981665 41.4055022 32.5061735  
45 H 44.3000309 40.7597031 31.6342037  
46 N 49.1518456 37.3414840 37.5261082  
47 C 47.9989299 36.4022796 37.7196266  
48 C 48.4942463 34.9373598 37.7763202  
49 O 49.6755633 34.7072161 37.4006467  
50 C 46.9885696 36.6801997 36.5921767  
51 C 45.6001780 36.0525187 36.7053614  
52 C 44.8684887 36.3945267 38.0024816  
53 N 43.4647677 36.0732708 37.8704515  
54 C 42.5273486 36.3682213 38.7833810  
55 N 42.8617016 36.8756621 39.9805859  
56 N 41.2472184 36.1638451 38.4857193  
57 O 47.6485861 34.1174191 38.1770462  
58 H 47.5582389 36.6531917 38.6962864  
59 H 46.8747635 37.7749014 36.5204885  
60 H 47.4474656 36.3607097 35.6403851  
61 H 45.0140175 36.4426171 35.8599764  
62 H 45.6601519 34.9595797 36.5954429  
63 H 45.3292186 35.8356654 38.8379712  
64 H 44.9972487 37.4675782 38.2438438  
65 H 43.0928699 35.7060164 36.9704821  
66 H 42.0998222 37.0210935 40.6472653  
67 H 43.8216422 36.8778503 40.3265749  
68 H 40.9686493 35.9537769 37.5263250  
69 H 40.5260956 36.4882316 39.1336217  
70 H 50.0023959 37.0296656 38.0180005  
71 H 49.4169333 37.3705858 36.5233294  
72 H 48.9141325 38.3052509 37.8452509  
73 H 41.3048045 32.4262963 34.8808638  
74 H 44.1848156 34.6466062 27.1540583  
75 H 47.2456244 32.4484721 31.6494444

**BO-IM+0.010**

1 C 47.4189185 33.1250958 32.5024117  
2 H 47.1721633 32.5791484 33.4256567  
3 H 48.5102833 33.2851568 32.5012045  
4 C 46.6418302 34.4037811 32.4764336  
5 N 46.8764486 35.4529705 31.6054033  
6 H 47.6555287 35.5380196 30.9483131  
7 C 45.8796965 36.3518332 31.7536106  
8 H 45.7785836 37.2617288 31.1658115  
9 N 45.0296134 35.9521962 32.6792493

10 C 45.4847118 34.7432385 33.1415441  
 11 H 44.9351391 34.1700182 33.8853452  
 12 C 40.7521038 33.2977832 34.5276897  
 13 H 40.5193104 33.1541900 33.4651319  
 14 H 39.7971673 33.4642299 35.0503898  
 15 C 41.6550452 34.5103094 34.7705393  
 16 O 41.8813512 34.8360907 35.9536347  
 17 O 42.1363826 35.0698380 33.7370719  
 18 C 43.2324492 35.2172828 27.4349144  
 19 H 43.2261734 36.2285021 27.0033973  
 20 H 42.4752699 34.6323240 26.8877505  
 21 C 42.8778862 35.2789827 28.8832273  
 22 N 42.3081822 34.2299570 29.5817500  
 23 H 42.0520363 33.3067132 29.2154673  
 24 C 42.1308591 34.6214827 30.8582939  
 25 H 41.7248764 33.9907282 31.6420583  
 26 N 42.5388948 35.8710555 31.0308953  
 27 C 42.9989608 36.2963154 29.8019258  
 28 H 43.3597037 37.3099927 29.6449016  
 29 Fe 43.0422746 36.6817812 32.9801046  
 30 O 42.1655093 38.5031193 33.9289852  
 31 O 41.8845782 39.5971244 33.0532481  
 32 C 43.4253666 38.7498934 34.6728277  
 33 O 43.8970327 37.6342904 34.9428328  
 34 O 43.7709373 39.9050350 34.8196062  
 35 C 42.7457886 39.5750413 32.0144639  
 36 O 43.5530217 38.6533653 31.8916313  
 37 C 42.5771748 40.7629787 31.1478801  
 38 C 42.7332554 40.4656779 29.6637914  
 39 C 43.1588049 41.7260132 28.8656132  
 40 O 43.6631151 42.6761416 29.5177323  
 41 O 42.9919313 41.6304153 27.6374301  
 42 H 43.5262539 39.7129507 29.5050583  
 43 H 41.8100379 40.0641933 29.2213278  
 44 H 41.6249399 41.2608856 31.3859692  
 45 H 43.3730460 41.4908070 31.4093225  
 46 N 49.1394409 37.3015690 37.4669190  
 47 C 48.0333621 36.3222353 37.7344722  
 48 C 48.5920205 34.8856907 37.8526318  
 49 O 49.7482653 34.6691945 37.3958110  
 50 C 46.9996632 36.4533004 36.6007220  
 51 C 45.6534407 35.7625854 36.8154348  
 52 C 44.8632465 36.3338899 37.9928213  
 53 N 43.4692201 35.9567595 37.8859572  
 54 C 42.5300600 36.2996040 38.7812153  
 55 N 42.8589778 36.8396649 39.9658872  
 56 N 41.2492519 36.1044047 38.4766211  
 57 O 47.8110989 34.0629964 38.3619439  
 58 H 47.5931073 36.6086594 38.7011774  
 59 H 46.8103459 37.5264989 36.4277588  
 60 H 47.4646946 36.0684610 35.6758596  
 61 H 45.0688210 35.9381161 35.9026227  
 62 H 45.7862403 34.6769725 36.9407127  
 63 H 45.2828374 35.9635429 38.9446699  
 64 H 44.9648821 37.4354270 38.0085669  
 65 H 43.0958971 35.6549416 36.9687745  
 66 H 42.0942531 36.9850134 40.6297754  
 67 H 43.8144072 36.8319519 40.3252479

68 H 40.9900408 35.8520092 37.5224436  
 69 H 40.5241141 36.4559985 39.1050137  
 70 H 50.0202665 37.0340155 37.9327998  
 71 H 49.3634638 37.3252439 36.4542084  
 72 H 48.8814822 38.2655092 37.7730030  
 73 H 41.2584281 32.4078649 34.9015191  
 74 H 44.1809510 34.7354138 27.1978201  
 75 H 47.2103790 32.4855317 31.6447777

**BO-RC-0.0025**

1 C 47.6215718 33.0577244 32.5083385  
 2 H 47.3654221 32.5086092 33.4270076  
 3 H 48.7112275 33.2146117 32.5310822  
 4 C 46.8501684 34.3437034 32.4830417  
 5 N 47.0633786 35.3740181 31.5829696  
 6 H 47.8283087 35.4500279 30.9013103  
 7 C 46.1096736 36.3021678 31.7517787  
 8 H 46.0093730 37.1908368 31.1357752  
 9 N 45.2866735 35.9466292 32.7313650  
 10 C 45.7433420 34.7318412 33.2028724  
 11 H 45.2386914 34.2067634 34.0065807  
 12 C 41.0305615 33.3420170 34.4124943  
 13 H 40.8969012 33.2891586 33.3255524  
 14 H 40.0449165 33.5307482 34.8665872  
 15 C 41.9569621 34.4851460 34.8269280  
 16 O 42.0272624 34.7841140 36.0244327  
 17 O 42.6187601 35.0569374 33.8883734  
 18 C 43.3031246 35.0382920 27.4037257  
 19 H 43.2503884 36.0567123 26.9933661  
 20 H 42.5558312 34.4274809 26.8707844  
 21 C 43.0245294 35.0617354 28.8665784  
 22 N 42.5908085 33.9702182 29.5961577  
 23 H 42.3689561 33.0353881 29.2374638  
 24 C 42.5539013 34.3186441 30.8954095  
 25 H 42.3000316 33.6411135 31.7047087  
 26 N 42.9082260 35.5856538 31.0421014  
 27 C 43.1952192 36.0667244 29.7859017  
 28 H 43.5069953 37.0952521 29.6297900  
 29 Fe 43.2664137 36.5813140 32.9005847  
 30 O 41.3381027 37.3583401 32.6129837  
 31 O 41.1901496 38.6205163 32.5582263  
 32 C 43.4150798 39.2696580 33.7875324  
 33 O 43.4782015 38.0695925 34.2463662  
 34 O 43.4485320 40.3101107 34.4429292  
 35 C 43.3485723 39.3276538 32.2503729  
 36 O 43.6985114 38.2803122 31.6693747  
 37 C 43.1173386 40.6253642 31.5528445  
 38 C 42.7221295 40.5094936 30.0873939  
 39 C 42.7794279 41.8355399 29.2905498  
 40 O 43.4956537 42.7616763 29.7526094  
 41 O 42.1282509 41.8385444 28.2210502  
 42 H 43.4062010 39.8109417 29.5731539  
 43 H 41.7150768 40.0767619 29.9805895  
 44 H 42.3889798 41.2005409 32.1451199  
 45 H 44.0469574 41.2203954 31.6259575  
 46 N 49.3477943 37.1955379 37.7942399  
 47 C 48.0978765 36.3872957 37.9215393  
 48 C 48.4246013 34.8748145 37.8181327

49 O 49.5420052 34.5876225 37.3421249  
 50 C 47.1332826 36.8596802 36.8236948  
 51 C 45.7256359 36.2604545 36.8326608  
 52 C 44.9959559 36.3952052 38.1679902  
 53 N 43.5833325 36.0860073 37.9845221  
 54 C 42.6361643 36.2139667 38.9124487  
 55 N 42.9075549 36.6863521 40.1407941  
 56 N 41.3725083 35.9057678 38.5979437  
 57 O 47.5039827 34.1124792 38.1871690  
 58 H 47.6956729 36.6029486 38.9226646  
 59 H 47.0599054 37.9563776 36.8947224  
 60 H 47.5963894 36.6331757 35.8468909  
 61 H 45.1407924 36.7745770 36.0513380  
 62 H 45.7754895 35.1920656 36.5715184  
 63 H 45.4482175 35.7016936 38.8942845  
 64 H 45.1013048 37.4164518 38.5759740  
 65 H 43.2664159 35.6965269 37.0875258  
 66 H 42.1522471 36.6288859 40.8215329  
 67 H 43.8668835 36.7071006 40.5062869  
 68 H 41.1450632 35.6223364 37.6479355  
 69 H 40.6353773 36.0723606 39.2801888  
 70 H 50.0968383 36.8834745 38.4319240  
 71 H 49.7579373 37.1050714 36.8439166  
 72 H 49.1597170 38.1971125 38.0068781  
 73 H 41.4354512 32.3927518 34.7632463  
 74 H 44.2677898 34.6055662 27.1387037  
 75 H 47.4323254 32.4249567 31.6412411

**BO-TS-0.0025**

1 C 47.6166683 33.0744827 32.5053346  
 2 H 47.3704412 32.5231844 33.4253377  
 3 H 48.7048471 33.2405818 32.5223324  
 4 C 46.8351676 34.3545347 32.4878735  
 5 N 47.0396137 35.3959451 31.5960620  
 6 H 47.8010987 35.4770317 30.9104446  
 7 C 46.0844476 36.3189197 31.7790151  
 8 H 45.9696340 37.2194191 31.1820139  
 9 N 45.2680108 35.9457001 32.7600115  
 10 C 45.7304657 34.7284578 33.2171618  
 11 H 45.2355766 34.1960182 34.0220044  
 12 C 41.0219390 33.3661102 34.4020605  
 13 H 40.8782687 33.3094560 33.3164684  
 14 H 40.0381637 33.5508447 34.8629657  
 15 C 41.9384970 34.5245606 34.8044343  
 16 O 42.0476889 34.7959052 36.0066722  
 17 O 42.5338938 35.1418476 33.8526567  
 18 C 43.3009507 35.0429063 27.4025365  
 19 H 43.2504138 36.0615264 26.9925437  
 20 H 42.5552546 34.4328973 26.8661885  
 21 C 43.0159732 35.0652672 28.8643337  
 22 N 42.5845582 33.9691822 29.5901178  
 23 H 42.3659207 33.0350987 29.2280860  
 24 C 42.5370180 34.3144090 30.8896638  
 25 H 42.2822593 33.6341473 31.6967341  
 26 N 42.8803301 35.5835998 31.0395669  
 27 C 43.1730914 36.0699823 29.7868407  
 28 H 43.4792879 37.1027083 29.6430221  
 29 Fe 43.2920724 36.6308419 32.8522989

30 O 41.3272265 37.5628124 32.5801649  
 31 O 41.5429287 38.9076706 32.3657836  
 32 C 43.2968381 39.2703311 33.8649743  
 33 O 43.3789659 38.0863421 34.3330437  
 34 O 43.4695769 40.3370575 34.4389470  
 35 C 42.9081090 39.2318657 32.2959815  
 36 O 43.6381887 38.2318319 31.7764040  
 37 C 42.9967427 40.5863371 31.5922429  
 38 C 42.6659571 40.4987491 30.1054574  
 39 C 42.7750649 41.8196721 29.3068881  
 40 O 43.4663312 42.7517299 29.7890936  
 41 O 42.1743277 41.8142698 28.2056457  
 42 H 43.3525297 39.7828545 29.6189881  
 43 H 41.6526391 40.0947856 29.9477971  
 44 H 42.3229059 41.2817837 32.1160395  
 45 H 44.0111095 40.9812818 31.7374219  
 46 N 49.3515091 37.1959479 37.7973369  
 47 C 48.1010168 36.3885880 37.9236836  
 48 C 48.4259088 34.8759063 37.8183796  
 49 O 49.5429338 34.5878500 37.3420376  
 50 C 47.1374584 36.8633012 36.8260562  
 51 C 45.7294389 36.2653058 36.8326999  
 52 C 44.9975607 36.3981793 38.1669603  
 53 N 43.5855250 36.0894187 37.9796170  
 54 C 42.6372960 36.2097219 38.9072112  
 55 N 42.9054803 36.6771919 40.1382219  
 56 N 41.3752525 35.8976780 38.5899001  
 57 O 47.5042723 34.1141546 38.1861718  
 58 H 47.6987533 36.6033765 38.9250051  
 59 H 47.0653326 37.9598665 36.8983956  
 60 H 47.6015471 36.6380329 35.8494870  
 61 H 45.1452978 36.7810196 36.0518431  
 62 H 45.7783449 35.1973834 36.5695405  
 63 H 45.4481392 35.7033096 38.8930139  
 64 H 45.1027801 37.4187101 38.5769456  
 65 H 43.2696486 35.7071125 37.0785914  
 66 H 42.1493235 36.6145492 40.8176052  
 67 H 43.8641999 36.7010134 40.5048348  
 68 H 41.1515449 35.6209460 37.6367842  
 69 H 40.6354605 36.0651150 39.2690018  
 70 H 50.1007286 36.8820570 38.4338756  
 71 H 49.7608098 37.1078013 36.8464108  
 72 H 49.1643173 38.1971371 38.0124717  
 73 H 41.4309633 32.4184789 34.7524334  
 74 H 44.2659215 34.6095348 27.1396916  
 75 H 47.4290643 32.4383706 31.6403299

**BO-IM-0.0025**

1 C 47.6311313 33.0606396 32.5184532  
 2 H 47.3855545 32.5075633 33.4376453  
 3 H 48.7226058 33.2071151 32.5242484  
 4 C 46.8695648 34.3521824 32.5135693  
 5 N 47.0647648 35.3796850 31.6078864  
 6 H 47.8148300 35.4534348 30.9101892  
 7 C 46.1195014 36.3135507 31.8038283  
 8 H 46.0131826 37.2082605 31.1973958  
 9 N 45.3218618 35.9654316 32.8049881  
 10 C 45.7853832 34.7483973 33.2637686



11 H 45.3055642 34.2229375 34.0836492  
12 C 40.8536232 33.2625315 34.4610677  
13 H 40.6417113 33.1538437 33.3902015  
14 H 39.8913891 33.4128147 34.9782731  
15 C 41.7281679 34.4847726 34.7504305  
16 O 41.9662303 34.7729057 35.9357635  
17 O 42.1170032 35.1259679 33.7211799  
18 C 43.3180795 35.1292667 27.4394952  
19 H 43.2846762 36.1408513 27.0099816  
20 H 42.5561984 34.5253460 26.9193393  
21 C 43.0328356 35.1803239 28.9011157  
22 N 42.5424193 34.1116352 29.6267540  
23 H 42.3205400 33.1750835 29.2722892  
24 C 42.4560833 34.4854419 30.9190059  
25 H 42.1400793 33.8348766 31.7284150  
26 N 42.8363882 35.7455524 31.0715438  
27 C 43.1952915 36.1915081 29.8195144  
28 H 43.5597698 37.2024093 29.6518509  
29 Fe 43.3198393 36.5440835 33.0349414  
30 O 42.0185891 38.3766436 33.5401444  
31 O 41.9021060 39.4573971 32.6199130  
32 C 43.0218868 38.7361007 34.5983938  
33 O 43.4917257 37.6720024 35.0110782  
34 O 43.2008944 39.9222019 34.7955068  
35 C 43.0283013 39.5426951 31.8671448  
36 O 43.8877456 38.6808434 31.8986912  
37 C 43.0055317 40.7938901 31.0569362  
38 C 42.6063959 40.5579783 29.6004565  
39 C 42.6416059 41.8778363 28.7943321  
40 O 43.3623193 42.7957353 29.2615637  
41 O 41.9588545 41.8846059 27.7498851  
42 H 43.3083139 39.8519239 29.1214863  
43 H 41.6009391 40.1171746 29.5153815  
44 H 42.3153108 41.5076089 31.5273987  
45 H 44.0077284 41.2425987 31.0769903  
46 N 49.3511079 37.1521630 37.7900183  
47 C 48.1229313 36.3167350 37.9473518  
48 C 48.4865039 34.8128163 37.8726252  
49 O 49.5934520 34.5445346 37.3605606  
50 C 47.1428935 36.7231732 36.8384439  
51 C 45.7667269 36.0573750 36.8580316  
52 C 44.9889572 36.2773317 38.1540388  
53 N 43.5814810 35.9565060 37.9494679  
54 C 42.6238628 36.1079887 38.8617732  
55 N 42.8862920 36.5882405 40.0906802  
56 N 41.3604712 35.8108969 38.5340973  
57 O 47.5987841 34.0369889 38.2873656  
58 H 47.7181841 36.5465739 38.9442561  
59 H 47.0149354 37.8171787 36.8817115  
60 H 47.6212590 36.4950626 35.8693098  
61 H 45.1878745 36.4845598 36.0269325  
62 H 45.8713657 34.9751777 36.6881021  
63 H 45.4114407 35.6372350 38.9447244  
64 H 45.0846741 37.3246656 38.4946535  
65 H 43.2622739 35.6396472 37.0243866  
66 H 42.1274959 36.5272983 40.7678353  
67 H 43.8430425 36.6168179 40.4614060  
68 H 41.1545337 35.5207063 37.5782792

69 H 40.6138206 36.0185289 39.1933679  
70 H 50.1110621 36.8772537 38.4315954  
71 H 49.7567135 37.0467622 36.8393752  
72 H 49.1389944 38.1558429 37.9696967  
73 H 41.3400509 32.3520879 34.8111357  
74 H 44.2697956 34.6700292 27.1722791  
75 H 47.4202363 32.4361188 31.6503724

**BO-RC-0.0050**

1 C 47.6283243 33.0847145 32.4999891  
2 H 47.3787345 32.5389417 33.4222971  
3 H 48.7177859 33.2436500 32.5188767  
4 C 46.8550108 34.3694054 32.4719042  
5 N 47.0678848 35.4004973 31.5718606  
6 H 47.8364406 35.4773144 30.8927156  
7 C 46.1105317 36.3246653 31.7338941  
8 H 46.0115834 37.2125114 31.1166820  
9 N 45.2835667 35.9678003 32.7123377  
10 C 45.7452759 34.7549212 33.1883881  
11 H 45.2449631 34.2307663 33.9950062  
12 C 41.0246613 33.3434444 34.3866726  
13 H 40.8971073 33.2914350 33.2990241  
14 H 40.0375160 33.5317179 34.8379973  
15 C 41.9462203 34.4894445 34.8057647  
16 O 42.0092146 34.7901212 36.0028830  
17 O 42.6060623 35.0653067 33.8683247  
18 C 43.3045692 35.0314254 27.3884694  
19 H 43.2485554 36.0492901 26.9769689  
20 H 42.5621630 34.4148770 26.8550980  
21 C 43.0246792 35.0540265 28.8504501  
22 N 42.6031883 33.9586177 29.5811784  
23 H 42.3918539 33.0220490 29.2204925  
24 C 42.5699857 34.3063672 30.8810270  
25 H 42.3326222 33.6256798 31.6928334  
26 N 42.9115184 35.5770946 31.0253815  
27 C 43.1897336 36.0605958 29.7686835  
28 H 43.4985037 37.0899977 29.6123474  
29 Fe 43.2693188 36.5785281 32.8784595  
30 O 41.3030364 37.3221500 32.5673052  
31 O 41.1331565 38.5839718 32.5073912  
32 C 43.3232686 39.2659026 33.7785310  
33 O 43.4097017 38.0653743 34.2294108  
34 O 43.3227383 40.3017757 34.4436042  
35 C 43.2695415 39.3304911 32.2404270  
36 O 43.6510230 38.2975438 31.6539498  
37 C 43.0241001 40.6342999 31.5535947  
38 C 42.5832103 40.5355138 30.0983850  
39 C 42.6315856 41.8693137 29.3140940  
40 O 43.3941564 42.7699680 29.7509602  
41 O 41.9267745 41.9118013 28.2770230  
42 H 43.2469398 39.8359472 29.5594203  
43 H 41.5702743 40.1106663 30.0174957  
44 H 42.3191231 41.2113246 32.1713141  
45 H 43.9630228 41.2174045 31.5985720  
46 N 49.3566527 37.1511033 37.7335114  
47 C 48.1039245 36.3572618 37.8946550  
48 C 48.4263844 34.8411181 37.8547751  
49 O 49.5468199 34.5377183 37.4000909

50 C 47.1440820 36.7838693 36.7746593  
51 C 45.7373399 36.1846625 36.8121989  
52 C 45.0156664 36.3667606 38.1464676  
53 N 43.5967927 36.0701242 37.9734190  
54 C 42.6555902 36.1980404 38.9045173  
55 N 42.9285163 36.6747729 40.1317801  
56 N 41.3890321 35.8908518 38.5941235  
57 O 47.4983544 34.0967421 38.2445426  
58 H 47.7007224 36.6179818 38.8845263  
59 H 47.0698659 37.8825594 36.7950942  
60 H 47.6070454 36.5136585 35.8090750  
61 H 45.1481070 36.6716131 36.0166979  
62 H 45.7858209 35.1072981 36.5910231  
63 H 45.4613494 35.6860308 38.8884511  
64 H 45.1335989 37.3977371 38.5251018  
65 H 43.2740857 35.6886490 37.0759330  
66 H 42.1847322 36.5879642 40.8209510  
67 H 43.8908357 36.6986121 40.4925001  
68 H 41.1653185 35.5801528 37.6517241  
69 H 40.6563534 36.0431341 39.2833048  
70 H 50.0938201 36.8820576 38.4030254  
71 H 49.7848085 36.9964143 36.7994447  
72 H 49.1577356 38.1681527 37.8457409  
73 H 41.4263583 32.3932765 34.7386493  
74 H 44.2721853 34.6040063 27.1256021  
75 H 47.4360966 32.4487974 31.6358565

**BO-TS-0.0050**

1 C 47.6118105 33.1065822 32.5067759  
2 H 47.3671751 32.5591862 33.4293164  
3 H 48.7004735 33.2704078 32.5242161  
4 C 46.8318298 34.3873352 32.4851123  
5 N 47.0382453 35.4297835 31.5941574  
6 H 47.8065290 35.5125716 30.9146506  
7 C 46.0804700 36.3500324 31.7699526  
8 H 45.9687595 37.2506249 31.1730466  
9 N 45.2583866 35.9763415 32.7485904  
10 C 45.7239553 34.7602820 33.2101052  
11 H 45.2330487 34.2291482 34.0174945  
12 C 41.0094621 33.3674043 34.3793697  
13 H 40.8738229 33.3113709 33.2928109  
14 H 40.0229727 33.5503100 34.8353280  
15 C 41.9206647 34.5288196 34.7866655  
16 O 42.0218003 34.8029441 35.9887559  
17 O 42.5149929 35.1484173 33.8359527  
18 C 43.3015453 35.0365339 27.3920393  
19 H 43.2479993 36.0555113 26.9830520  
20 H 42.5602684 34.4214234 26.8553869  
21 C 43.0150247 35.0557728 28.8527821  
22 N 42.5939723 33.9557302 29.5778977  
23 H 42.3899666 33.0188347 29.2134650  
24 C 42.5477259 34.2993493 30.8780976  
25 H 42.3072542 33.6151445 31.6858855  
26 N 42.8788550 35.5722547 31.0271116  
27 C 43.1650107 36.0614853 29.7745546  
28 H 43.4683554 37.0952234 29.6314702  
29 Fe 43.2823490 36.6276050 32.8326062  
30 O 41.2783486 37.5125752 32.5569941

31 O 41.4639317 38.8717629 32.3519522  
32 C 43.2074378 39.2675976 33.8596515  
33 O 43.3199187 38.0857787 34.3176618  
34 O 43.3546052 40.3370946 34.4358302  
35 C 42.8139290 39.2253259 32.2797572  
36 O 43.5706715 38.2503156 31.7580266  
37 C 42.8777461 40.5920372 31.5905556  
38 C 42.5067652 40.5292641 30.1107264  
39 C 42.6104172 41.8589080 29.3268456  
40 O 43.3652889 42.7557498 29.7810494  
41 O 41.9408125 41.9005255 28.2648842  
42 H 43.1763305 39.8140775 29.5999134  
43 H 41.4860098 40.1364405 29.9729163  
44 H 42.2186344 41.2802475 32.1430576  
45 H 43.8970305 40.9830949 31.7136921  
46 N 49.3605229 37.1474511 37.7322850  
47 C 48.1057535 36.3568107 37.8917446  
48 C 48.4247025 34.8401978 37.8487257  
49 O 49.5452220 34.5352780 37.3951959  
50 C 47.1472794 36.7879967 36.7723090  
51 C 45.7388704 36.1923890 36.8072808  
52 C 45.0157580 36.3724014 38.1410581  
53 N 43.5968352 36.0777069 37.9656342  
54 C 42.6563242 36.1970703 38.8985605  
55 N 42.9281650 36.6693233 40.1278762  
56 N 41.3909036 35.8855377 38.5878684  
57 O 47.4942459 34.0970525 38.2350174  
58 H 47.7029533 36.6166527 38.8820352  
59 H 47.0762136 37.8867218 36.7944653  
60 H 47.6105400 36.5186639 35.8066175  
61 H 45.1513063 36.6826465 36.0124611  
62 H 45.7845973 35.1154676 36.5835307  
63 H 45.4595736 35.6891043 38.8817945  
64 H 45.1350269 37.4021989 38.5225438  
65 H 43.2737284 35.7015228 37.0654836  
66 H 42.1854965 36.5750348 40.8173422  
67 H 43.8906077 36.6952202 40.4880318  
68 H 41.1696564 35.5773393 37.6438706  
69 H 40.6571320 36.0368773 39.2761428  
70 H 50.0973010 36.8748492 38.4007395  
71 H 49.7876908 36.9948426 36.7974930  
72 H 49.1647130 38.1647127 37.8474197  
73 H 41.4150278 32.4189221 34.7314566  
74 H 44.2692046 34.6086227 27.1301337  
75 H 47.4221142 32.4680595 31.6440064

**BO-IM-0.0050**

1 C 47.6711910 32.9820709 32.5518227  
2 H 47.4259719 32.4061696 33.4567875  
3 H 48.7654480 33.1082558 32.5522504  
4 C 46.9340999 34.2864390 32.5912521  
5 N 47.1286698 35.3266925 31.6995890  
6 H 47.8706974 35.4078889 30.9931358  
7 C 46.2011673 36.2688395 31.9254523  
8 H 46.0933538 37.1685644 31.3306127  
9 N 45.4127198 35.9169239 32.9344881  
10 C 45.8693104 34.6863339 33.3667849  
11 H 45.4007704 34.1564423 34.1897225

12 C 40.8571129 33.2963838 34.4506978  
13 H 40.6741419 33.2170202 33.3719645  
14 H 39.8830404 33.4396513 34.9477836  
15 C 41.7289775 34.5091591 34.7947379  
16 O 41.9449417 34.7524355 35.9951632  
17 O 42.1324309 35.1896932 33.7986032  
18 C 43.3141230 35.1415153 27.5105399  
19 H 43.2672878 36.1555189 27.0873133  
20 H 42.5422983 34.5373982 27.0052215  
21 C 43.0650959 35.1827842 28.9797551  
22 N 42.5763480 34.1166936 29.7104400  
23 H 42.3485088 33.1823540 29.3544653  
24 C 42.5324910 34.4836403 31.0086682  
25 H 42.2307852 33.8316003 31.8224754  
26 N 42.9367387 35.7356741 31.1601490  
27 C 43.2700209 36.1825146 29.9017312  
28 H 43.6626497 37.1815698 29.7293574  
29 Fe 43.4289054 36.5551668 33.1410981  
30 O 42.0945180 38.4638197 33.4546490  
31 O 42.1112434 39.4827394 32.4538903  
32 C 42.9898250 38.8451466 34.6200031  
33 O 43.4413484 37.7823118 35.0594211  
34 O 43.0911174 40.0280888 34.8618925  
35 C 43.2679377 39.4129224 31.7537032  
36 O 44.0912645 38.5411716 31.9631263  
37 C 43.3862705 40.5190305 30.7537018  
38 C 42.1191475 40.8459502 29.9640229  
39 C 42.3262784 42.0760234 29.0505895  
40 O 43.1918328 42.9053237 29.4319035  
41 O 41.6019396 42.1370752 28.0319947  
42 H 41.7870456 39.9953866 29.3480614  
43 H 41.2922079 41.0752375 30.6576446  
44 H 43.6902463 41.4328005 31.2923815  
45 H 44.2237248 40.2589578 30.0905750  
46 N 49.3406443 37.1145969 37.7129929  
47 C 48.1152223 36.2899879 37.9349202  
48 C 48.4903929 34.7864207 37.9801921  
49 O 49.5907836 34.4938846 37.4694573  
50 C 47.1393955 36.5928410 36.7900935  
51 C 45.7632803 35.9315435 36.8766102  
52 C 44.9987508 36.2484911 38.1610749  
53 N 43.5851135 35.9353127 37.9806067  
54 C 42.6342571 36.0995978 38.8949514  
55 N 42.8957734 36.6050035 40.1144047  
56 N 41.3693398 35.7932944 38.5773750  
57 O 47.6156188 34.0418518 38.4719951  
58 H 47.7051818 36.5964394 38.9085239  
59 H 47.0110549 37.6851417 36.7218501  
60 H 47.6167892 36.2718259 35.8475262  
61 H 45.1751542 36.2935944 36.0197666  
62 H 45.8654590 34.8393971 36.7895995  
63 H 45.4183246 35.6541302 38.9882996  
64 H 45.1099441 37.3144384 38.4300155  
65 H 43.2553987 35.6085401 37.0627833  
66 H 42.1485478 36.5227891 40.8011773  
67 H 43.8548804 36.6531199 40.4792349  
68 H 41.1655239 35.4677293 37.6324640  
69 H 40.6277732 35.9924038 39.2434004

70 H 50.1036628 36.8890834 38.3704392  
71 H 49.7510577 36.9389057 36.7745819  
72 H 49.1233926 38.1302952 37.7894951  
73 H 41.3251081 32.3731084 34.7921801  
74 H 44.2615916 34.6892430 27.2175892  
75 H 47.4365345 32.3917556 31.6660850

**BO-RC-0.0075**

1 C 47.5613682 33.1395110 32.5354953  
2 H 47.3080708 32.5949756 33.4574327  
3 H 48.6503556 33.3001972 32.5610006  
4 C 46.7819845 34.4201253 32.4949184  
5 N 47.0057100 35.4508245 31.5967119  
6 H 47.7926036 35.5318869 30.9376253  
7 C 46.0272857 36.3578125 31.7211844  
8 H 45.9355074 37.2379374 31.0922390  
9 N 45.1785408 35.9933108 32.6806271  
10 C 45.6479132 34.7923714 33.1807382  
11 H 45.1275499 34.2625280 33.9697821  
12 C 40.9663354 33.3283299 34.4021688  
13 H 40.7668995 33.2282863 33.3276004  
14 H 40.0157445 33.5597191 34.9088733  
15 C 41.9415780 34.4729997 34.7011948  
16 O 42.0079433 34.8883699 35.8721510  
17 O 42.6176660 34.9056195 33.7167496  
18 C 43.3052420 35.0347572 27.3397322  
19 H 43.2526527 36.0451191 26.9091443  
20 H 42.5757897 34.4039734 26.8051664  
21 C 43.0030017 35.0799266 28.7957207  
22 N 42.5784502 33.9951589 29.5386608  
23 H 42.3951886 33.0465928 29.1940849  
24 C 42.5239904 34.3639677 30.8320829  
25 H 42.2947368 33.6997304 31.6596581  
26 N 42.8522504 35.6412682 30.9588034  
27 C 43.1492138 36.1035894 29.6981310  
28 H 43.4643136 37.1277034 29.5239690  
29 Fe 43.2275612 36.5754302 32.8074558  
30 O 41.2051665 36.9649895 32.7618956  
31 O 40.7908611 38.1257714 32.5894186  
32 C 43.2757280 39.3330896 33.6594164  
33 O 43.3556313 38.1313371 34.0705892  
34 O 43.2845203 40.3580246 34.3457917  
35 C 43.2014460 39.4719414 32.1118861  
36 O 43.4627244 38.4674782 31.4609745  
37 C 42.8733092 40.7987726 31.5065320  
38 C 42.2563686 40.7405564 30.1126627  
39 C 42.3707786 42.0565094 29.3083384  
40 O 43.2553665 42.8710622 29.6749403  
41 O 41.5920418 42.1739630 28.3290090  
42 H 42.7744099 39.9681639 29.5181873  
43 H 41.1987614 40.4311577 30.1481579  
44 H 42.2649766 41.3634310 32.2292552  
45 H 43.8155431 41.3768612 31.4361142  
46 N 49.3711930 37.1440137 37.7350783  
47 C 48.1112236 36.3670682 37.9190647  
48 C 48.4227002 34.8471271 37.9543560  
49 O 49.5433683 34.5191119 37.5236743  
50 C 47.1665209 36.7452578 36.7699847

51 C 45.7683523 36.1249602 36.8011478  
52 C 45.0170123 36.3344497 38.1152375  
53 N 43.6000628 36.0320675 37.9145345  
54 C 42.6412363 36.1500776 38.8264059  
55 N 42.8803317 36.6402929 40.0568125  
56 N 41.3834426 35.8231202 38.4928298  
57 O 47.4835058 34.1321113 38.3729515  
58 H 47.6996329 36.6747284 38.8917796  
59 H 47.0759601 37.8433037 36.7514891  
60 H 47.6499290 36.4491148 35.8221188  
61 H 45.1875060 36.5759738 35.9781467  
62 H 45.8369778 35.0424796 36.6142830  
63 H 45.4489891 35.6686767 38.8789343  
64 H 45.1240799 37.3741125 38.4738311  
65 H 43.2931938 35.6665456 37.0029763  
66 H 42.1334314 36.5191864 40.7370965  
67 H 43.8361883 36.6830337 40.4346557  
68 H 41.1948803 35.4918027 37.5464973  
69 H 40.6367946 35.9722958 39.1655907  
70 H 50.1117795 36.8761165 38.4028680  
71 H 49.7969625 36.9729286 36.8027836  
72 H 49.1838936 38.1644094 37.8292281  
73 H 41.3706574 32.3821187 34.7617175  
74 H 44.2793522 34.6085008 27.0999784  
75 H 47.3758487 32.5023326 31.6708259

**BO-TS-0.0075**

1 C 47.5342684 33.1852453 32.5374051  
2 H 47.2688781 32.6508849 33.4618697  
3 H 48.6219524 33.3499241 32.5780089  
4 C 46.7522839 34.4636453 32.4653536  
5 N 47.0020271 35.4881634 31.5701950  
6 H 47.8058937 35.5635804 30.9313201  
7 C 46.0217433 36.4000034 31.6610001  
8 H 45.9407446 37.2794522 31.0304309  
9 N 45.1500533 36.0386327 32.5973414  
10 C 45.5973410 34.8405494 33.1167768  
11 H 45.0682711 34.3289620 33.9118465  
12 C 40.9375040 33.4011613 34.3470010  
13 H 40.7383921 33.2976652 33.2728755  
14 H 39.9783742 33.6102332 34.8492499  
15 C 41.8631871 34.5896645 34.6500683  
16 O 42.0251584 34.9150732 35.8346972  
17 O 42.3708952 35.1770615 33.6353835  
18 C 43.2994458 35.0238482 27.3649503  
19 H 43.2351492 36.0350670 26.9386410  
20 H 42.5636809 34.3910199 26.8420944  
21 C 43.0235282 35.0670532 28.8264046  
22 N 42.6012463 33.9879005 29.5799832  
23 H 42.4037105 33.0404377 29.2389356  
24 C 42.5748795 34.3545551 30.8741986  
25 H 42.3456843 33.7001585 31.7081791  
26 N 42.9196730 35.6293144 30.9832405  
27 C 43.1988992 36.0927851 29.7191556  
28 H 43.5097917 37.1188821 29.5505919  
29 Fe 43.2165241 36.6771811 32.6455238  
30 O 41.2226987 37.5134154 32.5060853  
31 O 41.2666776 38.8002684 32.3123426

32 C 43.2303447 39.2120221 33.6602736  
33 O 43.4856227 38.0014603 34.0359258  
34 O 43.2749596 40.2074911 34.3776025  
35 C 42.8488834 39.2804888 32.1516145  
36 O 43.4395607 38.3259454 31.4946797  
37 C 42.7140215 40.6517406 31.5226769  
38 C 42.1636081 40.6413473 30.0985097  
39 C 42.3072976 41.9680577 29.3148055  
40 O 43.1797917 42.7823437 29.7086644  
41 O 41.5546016 42.0967202 28.3135638  
42 H 42.7047322 39.8759978 29.5143185  
43 H 41.1045037 40.3371870 30.0786558  
44 H 42.1065922 41.2783045 32.1951995  
45 H 43.7161642 41.1081969 31.5148279  
46 N 49.3827772 37.1411086 37.7417083  
47 C 48.1208042 36.3668324 37.9214324  
48 C 48.4260564 34.8458207 37.9480981  
49 O 49.5443677 34.5149361 37.5138885  
50 C 47.1788282 36.7562435 36.7740811  
51 C 45.7765452 36.1459422 36.8007120  
52 C 45.0290519 36.3481240 38.1181392  
53 N 43.6094551 36.0570284 37.9143795  
54 C 42.6516621 36.1605144 38.8290600  
55 N 42.8915175 36.6280138 40.0668469  
56 N 41.3925484 35.8403410 38.4912012  
57 O 47.4842106 34.1322239 38.3643816  
58 H 47.7097869 36.6706893 38.8955745  
59 H 47.0962744 37.8546053 36.7618146  
60 H 47.6607139 36.4625283 35.8248003  
61 H 45.1979838 36.6102218 35.9833971  
62 H 45.8374203 35.0644426 36.6046743  
63 H 45.4560249 35.6715193 38.8750441  
64 H 45.1431438 37.3833703 38.4869654  
65 H 43.3048407 35.7114447 36.9964086  
66 H 42.1452454 36.4994498 40.7464122  
67 H 43.8479360 36.6756581 40.4429119  
68 H 41.2008404 35.5267563 37.5409715  
69 H 40.6454208 35.9827532 39.1650014  
70 H 50.1221598 36.8710303 38.4097966  
71 H 49.8088508 36.9724462 36.8090724  
72 H 49.1965235 38.1615630 37.8384540  
73 H 41.3506939 32.4605634 34.7111670  
74 H 44.2723083 34.6042483 27.1089389  
75 H 47.3664334 32.5358067 31.6782613

**BO-IM-0.0075**

1 C 47.6536600 33.0136849 32.5428502  
2 H 47.4092382 32.4394015 33.4489939  
3 H 48.7485319 33.1349245 32.5426729  
4 C 46.9210817 34.3201579 32.5806265  
5 N 47.1189184 35.3603381 31.6889521  
6 H 47.8636833 35.4391278 30.9836448  
7 C 46.1903280 36.3018071 31.9074390  
8 H 46.0832352 37.1983483 31.3078586  
9 N 45.3973486 35.9520650 32.9156230  
10 C 45.8542509 34.7214970 33.3524766  
11 H 45.3846414 34.1929500 34.1756916  
12 C 40.8225876 33.3236388 34.4093452

13 H 40.6504984 33.2489711 33.3286489  
 14 H 39.8438983 33.4722233 34.8965088  
 15 C 41.6955834 34.5346363 34.7626929  
 16 O 41.9151638 34.7704269 35.9638352  
 17 O 42.0869337 35.2260161 33.7692434  
 18 C 43.3118676 35.1303996 27.4884167  
 19 H 43.2606740 36.1424564 27.0609103  
 20 H 42.5471488 34.5173641 26.9827908  
 21 C 43.0577389 35.1758588 28.9561958  
 22 N 42.5785505 34.1089015 29.6916751  
 23 H 42.3711605 33.1679179 29.3408457  
 24 C 42.5337313 34.4810956 30.9886007  
 25 H 42.2474582 33.8275838 31.8069315  
 26 N 42.9236069 35.7382969 31.1333178  
 27 C 43.2526218 36.1820345 29.8728572  
 28 H 43.6443254 37.1806768 29.6958709  
 29 Fe 43.4176669 36.5622808 33.1103360  
 30 O 41.9945050 38.4452887 33.3758669  
 31 O 41.9850514 39.4526073 32.3619297  
 32 C 42.8569870 38.8716883 34.5574642  
 33 O 43.3600377 37.8343413 34.9983803  
 34 O 42.8816892 40.0566923 34.8108148  
 35 C 43.1447289 39.4074941 31.6630744  
 36 O 44.0028720 38.5793622 31.8935112  
 37 C 43.2233591 40.4963026 30.6356355  
 38 C 41.9234197 40.8688617 29.9217318  
 39 C 42.1145818 42.1101747 29.0200144  
 40 O 43.0077656 42.9151841 29.3868586  
 41 O 41.3577028 42.2156234 28.0250508  
 42 H 41.5319483 40.0369511 29.3146310  
 43 H 41.1442756 41.1108600 30.6652047  
 44 H 43.5990221 41.4014646 31.1431789  
 45 H 44.0100463 40.2044095 29.9248346  
 46 N 49.3631707 37.1178433 37.7017501  
 47 C 48.1252777 36.3128353 37.9215463  
 48 C 48.4782551 34.8038111 37.9956216  
 49 O 49.5979224 34.4939244 37.5482094  
 50 C 47.1632157 36.6145179 36.7649927  
 51 C 45.7791779 35.9675103 36.8422980  
 52 C 45.0183532 36.2716815 38.1318118  
 53 N 43.5997204 35.9704424 37.9479112  
 54 C 42.6500356 36.1226605 38.8639486  
 55 N 42.9095886 36.6191457 40.0880911  
 56 N 41.3831408 35.8237330 38.5422754  
 57 O 47.5649211 34.0781639 38.4485419  
 58 H 47.7115204 36.6381629 38.8876302  
 59 H 47.0475901 37.7072773 36.6855999  
 60 H 47.6450912 36.2803989 35.8293470  
 61 H 45.1940711 36.3449407 35.9888227  
 62 H 45.8726871 34.8757247 36.7439684  
 63 H 45.4371677 35.6602652 38.9466224  
 64 H 45.1339191 37.3329528 38.4167840  
 65 H 43.2732757 35.6376175 37.0322174  
 66 H 42.1698858 36.5112398 40.7784272  
 67 H 43.8698124 36.6612918 40.4535453  
 68 H 41.1853945 35.4661304 37.6072086  
 69 H 40.6473934 35.9771594 39.2255719  
 70 H 50.1286902 36.8675688 38.3490166

71 H 49.7696407 36.9504420 36.7599733  
 72 H 49.1630758 38.1353907 37.7894047  
 73 H 41.2791101 32.3949237 34.7516062  
 74 H 44.2636482 34.6850133 27.1989139  
 75 H 47.4147036 32.4259426 31.6565511

**BO-RC-0.010**

1 C 47.5556805 33.1676231 32.5542315  
 2 H 47.3051521 32.6259438 33.4785075  
 3 H 48.6442120 33.3324425 32.5825784  
 4 C 46.7708854 34.4448088 32.5059548  
 5 N 46.9952393 35.4744231 31.6049412  
 6 H 47.7896836 35.5564762 30.9528034  
 7 C 46.0112591 36.3746543 31.7127537  
 8 H 45.9178975 37.2497757 31.0777608  
 9 N 45.1558605 36.0083959 32.6696707  
 10 C 45.6297895 34.8126754 33.1824374  
 11 H 45.1116141 34.2865654 33.9748124  
 12 C 40.9721572 33.3563792 34.3626027  
 13 H 40.7998595 33.2711059 33.2821659  
 14 H 40.0111378 33.5939417 34.8468963  
 15 C 41.9473399 34.4930176 34.6996684  
 16 O 41.9985442 34.8840523 35.8790726  
 17 O 42.6347114 34.9460354 33.7322010  
 18 C 43.3067685 35.0284082 27.3476750  
 19 H 43.2471091 36.0365437 26.9127564  
 20 H 42.5817268 34.3887177 26.8176321  
 21 C 43.0084848 35.0788883 28.8040309  
 22 N 42.6025158 33.9938579 29.5571680  
 23 H 42.4370621 33.0392073 29.2201517  
 24 C 42.5566695 34.3685624 30.8489710  
 25 H 42.3514060 33.7058395 31.6841202  
 26 N 42.8686055 35.6515384 30.9632218  
 27 C 43.1492793 36.1104812 29.6976398  
 28 H 43.4560264 37.1356083 29.5156105  
 29 Fe 43.2354129 36.5944123 32.7899193  
 30 O 41.2405550 36.9853263 32.7518638  
 31 O 40.8281827 38.1633363 32.5979047  
 32 C 43.2345375 39.3412121 33.6282522  
 33 O 43.3857558 38.1440227 34.0359346  
 34 O 43.1938681 40.3606826 34.3220320  
 35 C 43.1423857 39.4799676 32.0830663  
 36 O 43.4463682 38.4954016 31.4220181  
 37 C 42.7666991 40.8029030 31.4898011  
 38 C 42.1533517 40.7446163 30.0933687  
 39 C 42.2458016 42.0694623 29.3009376  
 40 O 43.1276542 42.8853776 29.6690979  
 41 O 41.4579970 42.2017374 28.3271417  
 42 H 42.6911633 39.9876580 29.4962989  
 43 H 41.1028148 40.4102954 30.1227384  
 44 H 42.1395594 41.3381636 32.2187012  
 45 H 43.6921949 41.4077723 31.4275412  
 46 N 49.4103696 37.1521930 37.7137237  
 47 C 48.1440573 36.3896056 37.9069060  
 48 C 48.4373556 34.8656927 37.9638534  
 49 O 49.5655244 34.5208398 37.5748098  
 50 C 47.2007603 36.7627044 36.7553222  
 51 C 45.8007918 36.1455668 36.7893125

52 C 45.0576172 36.3467805 38.1090851  
53 N 43.6354777 36.0519550 37.9131819  
54 C 42.6814316 36.1662563 38.8281522  
55 N 42.9232371 36.6538756 40.0600241  
56 N 41.4186827 35.8506096 38.4957312  
57 O 47.4724629 34.1689394 38.3585776  
58 H 47.7367432 36.7131696 38.8763517  
59 H 47.1125532 37.8606273 36.7289411  
60 H 47.6827432 36.4586361 35.8092745  
61 H 45.2158132 36.6022198 35.9716911  
62 H 45.8686951 35.0636768 36.5994867  
63 H 45.4928490 35.6698478 38.8607804  
64 H 45.1674817 37.3825615 38.4771781  
65 H 43.3277045 35.6782445 37.0062660  
66 H 42.1883479 36.5066133 40.7470253  
67 H 43.8817013 36.6903959 40.4348623  
68 H 41.2337161 35.4791599 37.5636554  
69 H 40.6838626 35.9498379 39.1895786  
70 H 50.1557985 36.8749738 38.3740636  
71 H 49.8322350 36.9795567 36.7796027  
72 H 49.2327638 38.1739266 37.8065171  
73 H 41.3535310 32.4009048 34.7227273  
74 H 44.2840529 34.6094861 27.1079116  
75 H 47.3727113 32.5276337 31.6910960

**BO-TS-0.010**

1 C 47.5549585 33.1937351 32.5500270  
2 H 47.2919141 32.6599181 33.4755006  
3 H 48.6444919 33.3498796 32.5894605  
4 C 46.7800646 34.4771256 32.4808078  
5 N 47.0229673 35.4927000 31.5740992  
6 H 47.8220504 35.5609419 30.9272511  
7 C 46.0481413 36.4095454 31.6697555  
8 H 45.9682382 37.2806780 31.0269391  
9 N 45.1842578 36.0660567 32.6216475  
10 C 45.6363086 34.8695079 33.1449262  
11 H 45.1250610 34.3665309 33.9575112  
12 C 40.9163797 33.4454967 34.3045964  
13 H 40.7220927 33.3434293 33.2301275  
14 H 39.9547983 33.6619408 34.7999771  
15 C 41.8429812 34.6358372 34.6054839  
16 O 42.0215861 34.9600840 35.7859047  
17 O 42.3181441 35.2335042 33.5778763  
18 C 43.3106291 35.0178832 27.3577516  
19 H 43.2417288 36.0268463 26.9264768  
20 H 42.5767854 34.3776041 26.8410633  
21 C 43.0428446 35.0666277 28.8198159  
22 N 42.6378861 33.9867044 29.5815137  
23 H 42.4525236 33.0351808 29.2446776  
24 C 42.6247533 34.3558585 30.8750294  
25 H 42.4168778 33.7016702 31.7149338  
26 N 42.9574462 35.6352282 30.9735369  
27 C 43.2195995 36.0973030 29.7059677  
28 H 43.5242133 37.1243707 29.5308326  
29 Fe 43.2082200 36.6956990 32.6210748  
30 O 41.0306501 37.5341428 32.4462818  
31 O 41.1258994 38.8231561 32.2291663  
32 C 43.0298468 39.2200254 33.6493985

33 O 43.3689507 38.0279670 34.0175560  
34 O 43.0109106 40.2115630 34.3720115  
35 C 42.6281071 39.2582649 32.1374628  
36 O 43.2758502 38.3017107 31.4978813  
37 C 42.5681443 40.6345893 31.4909729  
38 C 41.9915702 40.6473954 30.0744405  
39 C 42.1498246 41.9777820 29.2990787  
40 O 43.0416516 42.7703007 29.6909229  
41 O 41.3872133 42.1398123 28.3066689  
42 H 42.5042009 39.8746654 29.4740333  
43 H 40.9251440 40.3665948 30.0683845  
44 H 42.0048427 41.2979453 32.1682037  
45 H 43.5950709 41.0301779 31.4654793  
46 N 49.4207507 37.1501255 37.7186213  
47 C 48.1518963 36.3909608 37.9062860  
48 C 48.4371547 34.8659906 37.9627008  
49 O 49.5651740 34.5144798 37.5805805  
50 C 47.2151462 36.7705609 36.7517728  
51 C 45.8114454 36.1630378 36.7801602  
52 C 45.0678126 36.3647776 38.0995948  
53 N 43.6431687 36.0832757 37.8955816  
54 C 42.6877469 36.1753402 38.8117569  
55 N 42.9266163 36.6295982 40.0547529  
56 N 41.4246605 35.8667315 38.4690399  
57 O 47.4657255 34.1735870 38.3511320  
58 H 47.7425709 36.7147223 38.8748032  
59 H 47.1347908 37.8688669 36.7273441  
60 H 47.6979642 36.4646926 35.8069330  
61 H 45.2317205 36.6271695 35.9628849  
62 H 45.8725077 35.0811758 36.5873862  
63 H 45.4930808 35.6788826 38.8487846  
64 H 45.1860470 37.3973036 38.4741842  
65 H 43.3408213 35.7466263 36.9751940  
66 H 42.1912527 36.4696888 40.7386884  
67 H 43.8849894 36.6739128 40.4294875  
68 H 41.2387244 35.5276752 37.5267778  
69 H 40.6845615 35.9645582 39.1575609  
70 H 50.1665792 36.8651751 38.3752641  
71 H 49.8403111 36.9859668 36.7819548  
72 H 49.2454136 38.1714893 37.8206161  
73 H 41.3160191 32.4996440 34.6702712  
74 H 44.2855891 34.6024022 27.1030056  
75 H 47.3799170 32.5476339 31.6898056

**BO-IM-0.010**

1 C 47.4794911 33.2135118 32.5497871  
2 H 47.2245973 32.6688751 33.4715128  
3 H 48.5691126 33.3722079 32.5783593  
4 C 46.7022539 34.4954130 32.5046048  
5 N 46.9373989 35.5256019 31.6089400  
6 H 47.7281881 35.5979523 30.9527400  
7 C 45.9627579 36.4385395 31.7310813  
8 H 45.8714142 37.3214568 31.1073558  
9 N 45.1014770 36.0809882 32.6832347  
10 C 45.5640271 34.8746906 33.1809858  
11 H 45.0426860 34.3449321 33.9700510  
12 C 40.8359172 33.3667779 34.3639279  
13 H 40.5901014 33.2390917 33.3016342

14 H 39.9067417 33.6048230 34.9079731  
15 C 41.8110148 34.5310751 34.5908097  
16 O 41.9848889 34.9250522 35.7594413  
17 O 42.3531291 35.0049056 33.5474825  
18 C 43.2917780 35.0446692 27.2601313  
19 H 43.2578802 36.0487946 26.8135078  
20 H 42.5927950 34.4044733 26.6960971  
21 C 42.9074955 35.1115568 28.6947980  
22 N 42.4926358 34.0293676 29.4463335  
23 H 42.3865955 33.0601527 29.1289226  
24 C 42.3325182 34.4348803 30.7190720  
25 H 42.0985355 33.7809016 31.5537836  
26 N 42.5767340 35.7332041 30.8258986  
27 C 42.9372318 36.1675713 29.5703967  
28 H 43.2472609 37.1923322 29.3866561  
29 Fe 43.0899756 36.6672548 32.6671234  
30 O 41.8965755 37.9310841 33.2816723  
31 O 41.7684641 39.2755883 32.2129251  
32 C 43.1321314 38.9604857 35.0489296  
33 O 43.5571430 37.9325332 35.3890730  
34 O 42.8307902 40.0853780 34.9079726  
35 C 42.8106853 39.3029900 31.4577043  
36 O 43.6944723 38.4273804 31.4509045  
37 C 42.9116156 40.5075108 30.5412832  
38 C 41.6260979 40.8893686 29.8055791  
39 C 41.8095927 42.1492743 28.9324640  
40 O 42.7200695 42.9370879 29.2953732  
41 O 41.0395762 42.2987969 27.9483991  
42 H 41.2608551 40.0684681 29.1659933  
43 H 40.8235261 41.0875731 30.5395918  
44 H 43.2354174 41.3716899 31.1433655  
45 H 43.7287872 40.3028449 29.8347574  
46 N 49.4480209 37.0665000 37.7100810  
47 C 48.1837787 36.3084600 37.9367815  
48 C 48.4982375 34.7983877 38.1294057  
49 O 49.6588011 34.4491718 37.8623533  
50 C 47.2470058 36.5626209 36.7482559  
51 C 45.8714554 35.8928267 36.8093906  
52 C 45.0751647 36.2208111 38.0721072  
53 N 43.6582569 35.9122454 37.8628520  
54 C 42.6880573 36.0721157 38.7539439  
55 N 42.9165965 36.5780671 39.9814493  
56 N 41.4255826 35.7751976 38.4031910  
57 O 47.5173530 34.1136310 38.5034094  
58 H 47.7561674 36.6961365 38.8736636  
59 H 47.1157199 37.6530205 36.6327605  
60 H 47.7561919 36.2083961 35.8347468  
61 H 45.3054104 36.2254954 35.9253343  
62 H 45.9909587 34.8014449 36.7515132  
63 H 45.4798019 35.6242731 38.9041601  
64 H 45.1767202 37.2879111 38.3405150  
65 H 43.3547197 35.5820541 36.9382549  
66 H 42.1671771 36.4584458 40.6592381  
67 H 43.8689341 36.6156504 40.3700873  
68 H 41.2486897 35.4390306 37.4539666  
69 H 40.6748598 35.9366277 39.0663903  
70 H 50.2428457 36.6651419 38.2402237  
71 H 49.7694593 37.0232280 36.7235192

72 H 49.3410999 38.0712178 37.9625888  
73 H 41.2589050 32.4293868 34.7251016  
74 H 44.2764473 34.6187869 27.0674711  
75 H 47.2969174 32.5748513 31.6855841

**AI-RC+0.0050**

1 C 48.4058673 34.0990476 39.1293371  
2 H 48.1967576 34.0644299 38.0481662  
3 H 49.0888211 33.2591561 39.3310992  
4 C 47.1147841 33.9462831 39.8702093  
5 N 46.9837731 33.5174848 41.1815997  
6 H 47.7407031 33.2386666 41.8149344  
7 C 45.6718666 33.5467031 41.5060847  
8 H 45.2758958 33.2774454 42.4826314  
9 N 44.9479219 33.9644319 40.4761878  
10 C 45.8319081 34.2068674 39.4488103  
11 H 45.4962784 34.5249410 38.4655476  
12 C 42.4917483 36.5149210 36.5191034  
13 H 42.1983326 37.4510318 37.0137004  
14 H 41.6423428 36.1366900 35.9348383  
15 C 42.8679048 35.4314128 37.5407169  
16 O 42.9889525 34.2628877 37.1952005  
17 O 43.0291810 35.8477447 38.7642618  
18 C 45.9052452 38.4396035 43.9229505  
19 H 45.4474038 38.0577402 44.8471224  
20 H 45.8033833 39.5383332 43.9351491  
21 C 45.2053612 37.8495516 42.7487750  
22 N 45.1827536 38.3861590 41.4748837  
23 H 45.6349218 39.2494296 41.1609210  
24 C 44.4636921 37.5551208 40.6874913  
25 H 44.2734439 37.7035610 39.6275516  
26 N 44.0138744 36.5255999 41.3818611  
27 C 44.4689583 36.6945568 42.6657179  
28 H 44.2619427 35.9779097 43.4545617  
29 Fe 42.9456531 34.8127002 40.4468013  
30 O 41.3381317 32.3402064 40.7859763  
31 O 42.1536216 33.0079864 40.0677804  
32 C 40.8735243 35.5028275 42.3098635  
33 O 41.2206287 35.5474356 41.0674108  
34 O 39.9530792 36.0849565 42.8510553  
35 C 41.8354459 34.6330087 43.1685783  
36 O 42.8337258 34.1778172 42.6042754  
37 C 41.5715704 34.4512659 44.6189202  
38 C 40.5533020 33.3298483 44.9173993  
39 C 40.4284148 33.1197692 46.4510326  
40 O 40.3743959 34.1630076 47.1605454  
41 O 40.4108413 31.9385651 46.8404823  
42 H 39.5673640 33.6168385 44.5152324  
43 H 40.8517475 32.3802327 44.4511070  
44 H 42.5280117 34.2183346 45.1112428  
45 H 41.1553290 35.3800639 45.0346759  
46 N 47.2795597 28.7472231 37.0774282  
47 C 46.9487627 30.1562389 36.6951876  
48 C 48.1287000 30.8101048 35.9133216  
49 O 47.9735719 32.0282072 35.6488165  
50 C 46.5175444 30.9738480 37.9097283  
51 C 45.1873951 30.6129240 38.5914493  
52 C 43.9230822 31.0867205 37.8707166

53 N 43.4756301 30.2247482 36.7767779  
54 C 42.4820935 30.6008510 35.9508457  
55 N 41.9561330 29.7337035 35.0809236  
56 N 41.9843503 31.8422945 36.0021735  
57 O 49.0763071 30.0711685 35.5710817  
58 H 46.1199700 30.0874102 35.9736351  
59 H 47.3271121 30.9264086 38.6608250  
60 H 46.4740347 32.0154575 37.5634565  
61 H 45.1213517 29.5413239 38.8375226  
62 H 45.1789366 31.1236649 39.5670882  
63 H 43.1098239 31.1978386 38.6066462  
64 H 44.1037772 32.0975478 37.4767550  
65 H 43.7376702 29.2368359 36.7922652  
66 H 42.1835883 28.7345545 35.1507137  
67 H 41.2190180 30.0344818 34.4495915  
68 H 41.2616913 32.0703608 35.3164633  
69 H 42.4569117 32.6292101 36.4513447  
70 H 47.9672856 28.3397724 36.4049525  
71 H 47.7129440 28.6915838 38.0185738  
72 H 46.4157581 28.1640878 37.1003883  
73 H 43.3237487 36.7282428 35.8480325  
74 H 46.9768867 38.2459536 43.9693337  
75 H 48.9533361 35.0079454 39.3788360

**AI-TS+0.0050**

1 C 48.4168465 34.1100196 39.1146723  
2 H 48.2157108 34.0766195 38.0319566  
3 H 49.0957427 33.2678309 39.3204125  
4 C 47.1201501 33.9579808 39.8450639  
5 N 46.9817450 33.5278906 41.1569712  
6 H 47.7361349 33.2488565 41.7933534  
7 C 45.6706308 33.5584797 41.4763133  
8 H 45.2604186 33.3065237 42.4515280  
9 N 44.9515960 33.9765245 40.4403840  
10 C 45.8401856 34.2189677 39.4170701  
11 H 45.5071056 34.5396390 38.4345897  
12 C 42.4700288 36.5064516 36.5893509  
13 H 42.1809496 37.4517619 37.0688756  
14 H 41.6201015 36.1244667 36.0086982  
15 C 42.8289679 35.4409341 37.6399335  
16 O 42.8702018 34.2528980 37.3350042  
17 O 43.0513405 35.8820979 38.8408818  
18 C 45.9534423 38.5090803 43.9431355  
19 H 45.4872994 38.1169243 44.8586138  
20 H 45.8686960 39.6089820 43.9732343  
21 C 45.2538292 37.9446908 42.7576025  
22 N 45.2760220 38.4840486 41.4826633  
23 H 45.7386131 39.3459564 41.1815003  
24 C 44.5782058 37.6660928 40.6696915  
25 H 44.4182154 37.8191229 39.6058984  
26 N 44.1003088 36.6439454 41.3547535  
27 C 44.5061058 36.8004020 42.6558915  
28 H 44.2344639 36.0735929 43.4160318  
29 Fe 43.0449900 34.9564136 40.6154660  
30 O 41.2275603 32.9732191 42.0092372  
31 O 41.7872981 32.9495209 40.8035108  
32 C 40.8856667 35.3483585 42.3122555  
33 O 41.2660090 35.6476951 41.1053005

34 O 40.0711313 35.9229578 42.9948717  
35 C 41.7444940 34.1061079 42.8450491  
36 O 43.0130134 34.3393358 42.4977323  
37 C 41.5633573 33.7273080 44.3118274  
38 C 40.1806890 33.3110597 44.8210845  
39 C 40.2722165 33.0663983 46.3503840  
40 O 40.3022085 34.0997097 47.0791981  
41 O 40.3687925 31.8830948 46.7332030  
42 H 39.4646282 34.1215643 44.6264870  
43 H 39.8501307 32.3896238 44.3212692  
44 H 42.2934891 32.9254665 44.5118736  
45 H 41.8899599 34.6074060 44.8882035  
46 N 47.2801859 28.7573095 37.0973393  
47 C 46.9367721 30.1608233 36.7082570  
48 C 48.1154023 30.8192279 35.9250532  
49 O 47.9552643 32.0357183 35.6560620  
50 C 46.4969319 30.9847199 37.9161997  
51 C 45.1646260 30.6333667 38.6018566  
52 C 43.8973863 31.1266200 37.8963927  
53 N 43.4296790 30.2693995 36.8091296  
54 C 42.4371059 30.6460879 35.9815632  
55 N 41.9139891 29.7747390 35.1143712  
56 N 41.9371517 31.8861875 36.0294842  
57 O 49.0665022 30.0835039 35.5866481  
58 H 46.1109438 30.0802337 35.9845056  
59 H 47.3034251 30.9416078 38.6708597  
60 H 46.4571748 32.0243386 37.5637132  
61 H 45.0868860 29.5603797 38.8380833  
62 H 45.1701609 31.1345616 39.5822859  
63 H 43.0930907 31.2437571 38.6463037  
64 H 44.0827591 32.1360572 37.5009649  
65 H 43.6873780 29.2808338 36.8185674  
66 H 42.1571037 28.7789386 35.1789139  
67 H 41.1823392 30.0731029 34.4752535  
68 H 41.2187251 32.1113357 35.3383099  
69 H 42.3967077 32.6758990 36.4888683  
70 H 47.9673492 28.3511897 36.4232054  
71 H 47.7186874 28.7088505 38.0364932  
72 H 46.4211143 28.1675977 37.1271918  
73 H 43.2992478 36.7126884 35.9126462  
74 H 47.0216269 38.2959514 43.9834451  
75 H 48.9655777 35.0166322 39.3696522

**AI-IM+0.0050**

1 C 48.4739713 34.1010538 39.1242414  
2 H 48.2593409 34.0690789 38.0441217  
3 H 49.1761393 33.2749207 39.3169163  
4 C 47.1913459 33.9183537 39.8718911  
5 N 47.0830296 33.5150555 41.1921951  
6 H 47.8492981 33.2782603 41.8305720  
7 C 45.7709350 33.5060286 41.5207093  
8 H 45.3981017 33.2448076 42.5088941  
9 N 45.0257618 33.8664919 40.4871824  
10 C 45.8963774 34.1193021 39.4510094  
11 H 45.5414425 34.4035864 38.4620622  
12 C 42.4193520 36.5038609 36.5806565  
13 H 42.0622542 37.4629407 36.9805366  
14 H 41.6115772 36.0534098 35.9867656



15 C 42.7607782 35.5281432 37.7217748  
16 O 43.1026987 34.3638517 37.4701715  
17 O 42.6451964 35.9827478 38.9161442  
18 C 45.8186553 38.3030079 43.9224134  
19 H 45.3883171 37.9140925 44.8565996  
20 H 45.6768394 39.3980755 43.9302967  
21 C 45.1096051 37.6941325 42.7617044  
22 N 45.0913188 38.2349048 41.4877396  
23 H 45.5693076 39.0829392 41.1740018  
24 C 44.3174462 37.4399361 40.7128471  
25 H 44.1110515 37.6041473 39.6585216  
26 N 43.8267787 36.4295397 41.4108104  
27 C 44.3158539 36.5728066 42.6876428  
28 H 44.0574365 35.8679251 43.4741274  
29 Fe 42.9985118 34.5763770 40.4229358  
30 O 41.2182808 32.5119740 41.5882111  
31 O 41.7626439 32.9799947 40.3392813  
32 C 40.8307340 36.6862329 43.1931343  
33 O 40.2728692 36.1831182 42.3060045  
34 O 41.3708029 37.2252618 44.0714445  
35 C 41.6737073 33.1412143 42.6603086  
36 O 42.5391934 34.0149594 42.5737910  
37 C 41.0235372 32.6741081 43.9393515  
38 C 40.7245530 33.7990826 44.9323875  
39 C 40.5464620 33.3446584 46.4062901  
40 O 40.2099846 34.2632107 47.1988500  
41 O 40.7831609 32.1528826 46.6905138  
42 H 41.5531040 34.5262887 44.9383881  
43 H 39.8208110 34.3616588 44.6440442  
44 H 40.1211696 32.1020645 43.6835327  
45 H 41.6982708 31.9615408 44.4431425  
46 N 47.2816512 28.7375347 37.0913552  
47 C 46.9597215 30.1486257 36.7098070  
48 C 48.1373318 30.7899973 35.9131360  
49 O 47.9870661 32.0073902 35.6431416  
50 C 46.5542809 30.9736620 37.9277228  
51 C 45.2097799 30.6606674 38.6070677  
52 C 43.9718134 31.2420529 37.9164904  
53 N 43.4179345 30.4061916 36.8518641  
54 C 42.4345463 30.8429654 36.0461639  
55 N 41.8355544 30.0045158 35.1946104  
56 N 42.0201870 32.1142700 36.1003670  
57 O 49.0787420 30.0446430 35.5671430  
58 H 46.1215833 30.0860413 35.9984468  
59 H 47.3610108 30.8950087 38.6786599  
60 H 46.5480248 32.0173782 37.5866714  
61 H 45.0806629 29.5843025 38.8021487  
62 H 45.2403456 31.1234841 39.6050408  
63 H 43.1927166 31.4430738 38.6729753  
64 H 44.2320888 32.2228352 37.4929868  
65 H 43.6135231 29.4044736 36.8471966  
66 H 42.0564540 29.0025069 35.2263087  
67 H 41.0965972 30.3605312 34.5880463  
68 H 41.3098238 32.3885979 35.4247853  
69 H 42.5188329 32.8673533 36.5858619  
70 H 47.9646342 28.3248503 36.4176004  
71 H 47.7166785 28.6805724 38.0314071  
72 H 46.4134529 28.1604895 37.1179150

73 H 43.2696368 36.7001878 35.9275573  
74 H 46.8983511 38.1588153 43.9615634  
75 H 49.0015625 35.0206163 39.3774597

**AI-RC+0.010**

1 C 48.4232929 33.9781110 39.1152283  
2 H 48.2634295 33.9026193 38.0266848  
3 H 49.0993539 33.1468883 39.3712294  
4 C 47.1044220 33.8442853 39.8097111  
5 N 46.9268631 33.3593513 41.0945187  
6 H 47.6596585 33.0038196 41.7170217  
7 C 45.6064703 33.4156713 41.3862248  
8 H 45.1731029 33.0958338 42.3315726  
9 N 44.9249105 33.9130857 40.3639610  
10 C 45.8424773 34.1728353 39.3712608  
11 H 45.5394759 34.5338439 38.3908000  
12 C 42.4287067 36.3224989 36.3435050  
13 H 42.0091227 37.2435644 36.7740827  
14 H 41.6590609 35.8290134 35.7297815  
15 C 42.8685241 35.3412425 37.4456658  
16 O 43.0375819 34.1571525 37.1795144  
17 O 43.0478838 35.8585312 38.6262454  
18 C 45.8756502 38.4190609 43.8559734  
19 H 45.4017360 38.0350378 44.7712903  
20 H 45.7640365 39.5182831 43.8665471  
21 C 45.1989547 37.8231328 42.6700306  
22 N 45.1725691 38.3761601 41.4016383  
23 H 45.6091892 39.2514226 41.1068043  
24 C 44.4605670 37.5423272 40.6041503  
25 H 44.2533319 37.6924505 39.5463210  
26 N 44.0284823 36.5015852 41.2846963  
27 C 44.4814645 36.6570825 42.5684588  
28 H 44.2827825 35.9227839 43.3440790  
29 Fe 42.9282491 34.7963311 40.3414741  
30 O 41.1194169 32.4133968 40.2699920  
31 O 42.0769864 33.0699355 39.8391875  
32 C 40.9285455 35.6116152 42.2482265  
33 O 41.2156519 35.5725019 40.9955031  
34 O 40.1026142 36.3109329 42.8102685  
35 C 41.8411567 34.6847357 43.1058896  
36 O 42.7764397 34.1291608 42.5257780  
37 C 41.6166695 34.5751986 44.5725945  
38 C 40.5107564 33.5647181 44.9485026  
39 C 40.4666919 33.3738629 46.4885315  
40 O 40.4740681 34.4230437 47.1978402  
41 O 40.4528896 32.1982110 46.8857998  
42 H 39.5368233 33.9483236 44.6026692  
43 H 40.6858792 32.5858672 44.4809182  
44 H 42.5658900 34.2643852 45.0365679  
45 H 41.3054645 35.5533985 44.9664327  
46 N 47.2708905 28.7681439 37.0063968  
47 C 46.9074631 30.1721257 36.6402411  
48 C 48.0822710 30.8831646 35.9062000  
49 O 47.8800141 32.0969633 35.6313102  
50 C 46.4361263 30.9623831 37.8606774  
51 C 45.1822619 30.4826956 38.6084276  
52 C 43.8330127 30.8269870 37.9749656  
53 N 43.4669502 30.0419746 36.7998019

54 C 42.4666813 30.4236682 35.9759417  
55 N 41.9486814 29.5663645 35.0998939  
56 N 41.9592625 31.6644728 36.0495203  
57 O 49.0886157 30.2044562 35.6175282  
58 H 46.0902958 30.0926978 35.9068124  
59 H 47.2748370 30.9972736 38.5811453  
60 H 46.2871111 31.9912884 37.5049348  
61 H 45.2349495 29.4155572 38.8615532  
62 H 45.1771199 30.9878390 39.5876959  
63 H 43.0521112 30.7152071 38.7513515  
64 H 43.8419446 31.8926500 37.7075483  
65 H 43.7319395 29.0510395 36.7916066  
66 H 42.1632161 28.5627200 35.1772920  
67 H 41.2135290 29.8552859 34.4617966  
68 H 41.2189789 31.8978550 35.3810675  
69 H 42.4707427 32.4500577 36.4500016  
70 H 47.9612968 28.3694183 36.3317786  
71 H 47.7075559 28.7013100 37.9455202  
72 H 46.4184324 28.1656921 37.0303438  
73 H 43.2802894 36.5920530 35.7188334  
74 H 46.9473844 38.2335884 43.9270565  
75 H 48.9569177 34.8943709 39.3677741

**AI-TS+0.010**

1 C 48.4027388 33.9755646 39.0996802  
2 H 48.2563106 33.9027781 38.0090383  
3 H 49.0722599 33.1407247 39.3609905  
4 C 47.0749460 33.8407039 39.7773686  
5 N 46.8843072 33.3384719 41.0551712  
6 H 47.6131523 32.9728896 41.6769826  
7 C 45.5645775 33.3952568 41.3395823  
8 H 45.1158990 33.0842156 42.2803137  
9 N 44.8917475 33.9078959 40.3160909  
10 C 45.8179033 34.1771622 39.3328847  
11 H 45.5262867 34.5554838 38.3566038  
12 C 42.3584688 36.2755316 36.4288962  
13 H 41.9328294 37.2110360 36.8211075  
14 H 41.6010030 35.7687604 35.8116403  
15 C 42.7371436 35.3348046 37.5872563  
16 O 42.7483685 34.1194346 37.4347255  
17 O 43.0142451 35.9101999 38.7256708  
18 C 45.9064281 38.4654616 43.8795939  
19 H 45.4250092 38.0716900 44.7868852  
20 H 45.8017462 39.5651337 43.9021564  
21 C 45.2425628 37.8839284 42.6803384  
22 N 45.2356986 38.4542279 41.4184661  
23 H 45.6570023 39.3428557 41.1433433  
24 C 44.5678308 37.6180703 40.5908992  
25 H 44.3694003 37.7902666 39.5359270  
26 N 44.1486730 36.5598958 41.2502935  
27 C 44.5553892 36.7040770 42.5498258  
28 H 44.3210222 35.9477009 43.2937553  
29 Fe 42.9701230 34.9007327 40.4685316  
30 O 41.0206889 33.1125035 41.7874012  
31 O 41.6356551 33.1320501 40.6588934  
32 C 40.9843939 35.5564732 42.3103262  
33 O 41.3502932 35.8311497 41.0885545  
34 O 40.2197940 36.2041864 42.9932477

35 C 41.7584516 34.3015127 42.8408541  
36 O 42.9887767 34.3212895 42.4157723  
37 C 41.5596967 33.8099039 44.2603027  
38 C 40.1610332 33.6971118 44.8813140  
39 C 40.3365059 33.4209891 46.3975737  
40 O 40.3290241 34.4296332 47.1667435  
41 O 40.5421798 32.2396102 46.7345682  
42 H 39.6127512 34.6360888 44.7361998  
43 H 39.6101389 32.8636230 44.4198624  
44 H 42.0894864 32.8478281 44.3484724  
45 H 42.1360114 34.5366620 44.8641619  
46 N 47.2714241 28.7530287 37.0230759  
47 C 46.9050717 30.1581973 36.6673755  
48 C 48.0763041 30.8741297 35.9296079  
49 O 47.8724177 32.0895544 35.6609339  
50 C 46.4400000 30.9424206 37.8940944  
51 C 45.1737204 30.4836361 38.6357533  
52 C 43.8340912 30.8520697 37.9933830  
53 N 43.4363624 30.0275231 36.8571581  
54 C 42.4257346 30.3893956 36.0383090  
55 N 41.9385705 29.5362930 35.1406144  
56 N 41.8791941 31.6118404 36.1339101  
57 O 49.0801650 30.1969780 35.6315221  
58 H 46.0847686 30.0817368 35.9370075  
59 H 47.2761150 30.9576057 38.6180005  
60 H 46.3096820 31.9763442 37.5462407  
61 H 45.2047676 29.4158477 38.8893557  
62 H 45.1752285 30.9884830 39.6147592  
63 H 43.0507854 30.8137545 38.7766041  
64 H 43.8854124 31.9029971 37.6731878  
65 H 43.7306313 29.0445193 36.8524440  
66 H 42.1827572 28.5379966 35.1975854  
67 H 41.1713828 29.8060024 34.5324886  
68 H 41.1434502 31.8444846 35.4601582  
69 H 42.3330307 32.3949956 36.5988508  
70 H 47.9593683 28.3586602 36.3431474  
71 H 47.7116597 28.6818497 37.9602467  
72 H 46.4187042 28.1514071 37.0466324  
73 H 43.2182075 36.5348416 35.8110977  
74 H 46.9765425 38.2692890 43.9462158  
75 H 48.9385409 34.8880365 39.3611726

**AI-IM+0.010**

1 C 48.4442535 33.9038937 39.1261588  
2 H 48.2831080 33.7891630 38.0409578  
3 H 49.1371538 33.0934596 39.4013350  
4 C 47.1344979 33.7748465 39.8374866  
5 N 46.9729287 33.3350615 41.1381310  
6 H 47.7144258 33.0122420 41.7685913  
7 C 45.6535011 33.3981274 41.4410383  
8 H 45.2352484 33.1090757 42.4030650  
9 N 44.9572138 33.8505490 40.4105396  
10 C 45.8641935 34.0802311 39.4048313  
11 H 45.5498617 34.4177453 38.4190607  
12 C 42.2472616 36.0672105 36.3775179  
13 H 41.7271350 37.0086654 36.6115504  
14 H 41.5969838 35.4429463 35.7475645  
15 C 42.5758272 35.3270262 37.6872884



55 N 41.9984410 30.1905605 35.4555631  
56 N 42.2496132 32.3425792 36.2520628  
57 O 48.9387844 29.4705034 35.6024983  
58 H 46.0290610 30.0284064 36.1152826  
59 H 47.6141500 31.1628613 38.4812415  
60 H 46.6682534 32.1184895 37.3421730  
61 H 45.3633232 29.8982644 39.0596287  
62 H 45.6329371 31.5197665 39.6584679  
63 H 43.4219266 31.5789711 38.9702172  
64 H 44.3085933 32.4824262 37.7674292  
65 H 43.7126208 29.6230495 37.1681182  
66 H 42.2268979 29.1942620 35.4895481  
67 H 41.2103642 30.5245992 34.8943393  
68 H 41.5842856 32.6565823 35.5490303  
69 H 42.7359908 33.1255229 36.7424759  
70 H 47.7083441 28.1694177 36.7472634  
71 H 47.5755077 28.7788797 38.2894207  
72 H 46.1835846 28.2551747 37.4947537  
73 H 43.3898348 36.8759332 35.9581001  
74 H 46.9992223 38.3104194 44.0338151  
75 H 48.9285334 35.2619057 39.3906214

**AI-TS-0.0050**

1 C 48.4371312 34.3970436 39.1135582  
2 H 48.1634492 34.4191902 38.0480931  
3 H 49.1196815 33.5468223 39.2615293  
4 C 47.1887774 34.2078960 39.9097214  
5 N 47.1217948 33.8630013 41.2510455  
6 H 47.9070530 33.7310317 41.9003801  
7 C 45.8203558 33.8240240 41.6046225  
8 H 45.4729794 33.6576457 42.6193345  
9 N 45.0474326 34.0839664 40.5659516  
10 C 45.8831921 34.3469900 39.5113818  
11 H 45.4919185 34.6272015 38.5389442  
12 C 42.5354773 36.6745124 36.7408149  
13 H 42.2495934 37.6039637 37.2513624  
14 H 41.6678108 36.2673350 36.2043945  
15 C 42.9319857 35.6546689 37.7829012  
16 O 43.1297974 34.4584530 37.5002038  
17 O 43.0346957 36.1325405 38.9534225  
18 C 45.9465332 38.5137182 44.0761986  
19 H 45.5345905 38.1281665 45.0211005  
20 H 45.8759886 39.6109246 44.1189144  
21 C 45.1919322 37.9620563 42.9234033  
22 N 45.1533215 38.5333942 41.6680544  
23 H 45.5862411 39.4094625 41.3650808  
24 C 44.4705881 37.7152976 40.8507587  
25 H 44.2974908 37.9020377 39.7922444  
26 N 44.0444669 36.6600654 41.5161495  
27 C 44.4783168 36.7948391 42.8097258  
28 H 44.2548989 36.0554468 43.5771928  
29 Fe 43.1552976 34.9632816 40.5817126  
30 O 41.2558973 33.1688783 41.8531605  
31 O 42.0587741 33.3256510 40.5603249  
32 C 40.5038507 35.8135747 42.3382569  
33 O 40.9912030 36.0128605 41.2910742  
34 O 40.0038276 35.6312282 43.3612059  
35 C 41.9245955 33.7334476 42.8263473

36 O 42.9617975 34.3658444 42.6325971  
37 C 41.5794353 33.5441064 44.2437762  
38 C 40.2409968 33.0671762 44.7791784  
39 C 40.2862775 32.8887970 46.3305514  
40 O 40.2948302 33.9414632 47.0185424  
41 O 40.3286722 31.7116125 46.7615322  
42 H 39.4753994 33.8311588 44.5957516  
43 H 39.9627387 32.1229577 44.2884969  
44 H 42.3856668 32.8883793 44.6036193  
45 H 41.8177103 34.5267672 44.6832276  
46 N 47.0878011 28.7510843 37.4250891  
47 C 46.9006037 30.1097199 36.8167500  
48 C 48.0968599 30.4299344 35.8701518  
49 O 48.0690397 31.5659462 35.3551078  
50 C 46.6696233 31.1529506 37.9062332  
51 C 45.4159047 30.9658465 38.7819754  
52 C 44.1079871 31.4888424 38.1876154  
53 N 43.5366879 30.6183800 37.1515047  
54 C 42.5724258 31.0304324 36.3024216  
55 N 41.9739955 30.1415334 35.4862486  
56 N 42.1830377 32.2958860 36.2759574  
57 O 48.9307763 29.5150593 35.6686191  
58 H 46.0148376 30.0334779 36.1685867  
59 H 47.5625221 31.1782163 38.5555545  
60 H 46.6302481 32.1311563 37.4066916  
61 H 45.3012778 29.9171633 39.1152877  
62 H 45.5694958 31.5434655 39.7048245  
63 H 43.3765129 31.6623250 38.9965427  
64 H 44.2921487 32.4799913 37.7517941  
65 H 43.6889742 29.6157848 37.2348586  
66 H 42.2258494 29.1510323 35.5023469  
67 H 41.2135747 30.4772279 34.8895190  
68 H 41.5246728 32.5896320 35.5587800  
69 H 42.6312204 33.0887637 36.7912756  
70 H 47.6930244 28.1876448 36.7968896  
71 H 47.5759674 28.7987958 38.3402809  
72 H 46.1764912 28.2730433 37.5599080  
73 H 43.3583288 36.8776435 36.0554534  
74 H 47.0172180 38.3095720 44.0711411  
75 H 48.9836472 35.3031577 39.3749863

**AI-IM-0.0050**

1 C 48.4187413 34.3513888 39.1131378  
2 H 48.1354737 34.3948807 38.0499127  
3 H 49.1285815 33.5173680 39.2228200  
4 C 47.1751481 34.1320968 39.9162401  
5 N 47.1235746 33.7689059 41.2508325  
6 H 47.9131639 33.6316098 41.8910679  
7 C 45.8266513 33.7258312 41.6252970  
8 H 45.5070997 33.5220196 42.6448358  
9 N 45.0306712 34.0098369 40.6033122  
10 C 45.8601129 34.2656511 39.5329824  
11 H 45.4636782 34.5363786 38.5572408  
12 C 42.4874373 36.6523309 36.6744244  
13 H 42.1524798 37.6029519 37.1082938  
14 H 41.6485072 36.2318085 36.0945911  
15 C 42.8359858 35.6324498 37.7694492  
16 O 43.2811595 34.5103552 37.4496078

17 O 42.6039140 35.9791843 38.9710204  
18 C 45.8485017 38.4244287 43.9885923  
19 H 45.4067896 38.0391170 44.9190630  
20 H 45.7536059 39.5226456 44.0087469  
21 C 45.1172664 37.8555938 42.8228536  
22 N 45.0999617 38.3980853 41.5519372  
23 H 45.5843775 39.2480655 41.2349518  
24 C 44.3313111 37.6126007 40.7717109  
25 H 44.1462017 37.7935820 39.7169082  
26 N 43.8287859 36.5983210 41.4667124  
27 C 44.3167944 36.7410141 42.7486923  
28 H 44.0580364 36.0449621 43.5413327  
29 Fe 43.0140325 34.7782499 40.6099124  
30 O 41.5196640 32.4572048 41.8193249  
31 O 41.8365170 33.0413003 40.5305806  
32 C 40.8610676 36.6619010 43.2712380  
33 O 40.4275301 36.2645121 42.2646959  
34 O 41.2740205 37.0638664 44.2786493  
35 C 41.9549572 33.1621274 42.8603526  
36 O 42.6405309 34.1675746 42.7146700  
37 C 41.5501281 32.6057504 44.1963605  
38 C 40.4865296 33.4258839 44.9412401  
39 C 40.2844095 32.9484657 46.4065836  
40 O 39.8165445 33.8086074 47.1881127  
41 O 40.5972231 31.7694933 46.6928903  
42 H 40.7677910 34.4875872 44.9859956  
43 H 39.5157378 33.3725601 44.4169916  
44 H 41.2225047 31.5651905 44.0968040  
45 H 42.4604808 32.6153394 44.8093659  
46 N 47.0773397 28.7166658 37.3939754  
47 C 46.9101907 30.0809363 36.7910664  
48 C 48.1083206 30.3842480 35.8432256  
49 O 48.0998366 31.5208485 35.3318575  
50 C 46.7038562 31.1189307 37.8889599  
51 C 45.4443405 30.9445168 38.7578579  
52 C 44.1543377 31.5125622 38.1677907  
53 N 43.5533972 30.6578145 37.1372928  
54 C 42.6082935 31.0961569 36.2826168  
55 N 41.9964070 30.2169578 35.4679335  
56 N 42.2575422 32.3747165 36.2491357  
57 O 48.9282980 29.4550019 35.6392825  
58 H 46.0200518 30.0257190 36.1464322  
59 H 47.5958894 31.1162778 38.5394802  
60 H 46.6853008 32.1028920 37.4002098  
61 H 45.2991565 29.8903241 39.0604316  
62 H 45.6090911 31.4896961 39.6976416  
63 H 43.4254263 31.7027909 38.9751522  
64 H 44.3651341 32.4960492 37.7290315  
65 H 43.6738765 29.6511118 37.2227460  
66 H 42.2214924 29.2202335 35.5092894  
67 H 41.2096211 30.5487969 34.9037801  
68 H 41.6129189 32.6930407 35.5293072  
69 H 42.7352240 33.1516802 36.7587144  
70 H 47.6821901 28.1505905 36.7676670  
71 H 47.5615169 28.7566152 38.3117265  
72 H 46.1605820 28.2466605 37.5226899  
73 H 43.3185349 36.8580648 35.9998745  
74 H 46.9216336 38.2349095 44.0117760

75 H 48.9625575 35.2603513 39.3702724

**AI-RC-0.010**

1 C 48.3524665 34.4648389 39.1492374  
2 H 48.0374207 34.5183842 38.0955426  
3 H 49.0445515 33.6150351 39.2451467  
4 C 47.1253125 34.2890173 39.9892911  
5 N 47.0930096 33.9433963 41.3308542  
6 H 47.8949146 33.7898600 41.9538143  
7 C 45.8144551 33.9843347 41.7535571  
8 H 45.5056531 33.8178249 42.7822445  
9 N 45.0082889 34.3042859 40.7468756  
10 C 45.8109996 34.4944026 39.6429739  
11 H 45.3983588 34.7782866 38.6808852  
12 C 42.5950527 36.7152387 36.7359755  
13 H 42.2720849 37.6622945 37.1856352  
14 H 41.7401347 36.2753682 36.1945317  
15 C 43.0266990 35.7038095 37.8035229  
16 O 43.3046351 34.5322841 37.4613336  
17 O 43.0676572 36.1194915 39.0004078  
18 C 45.9457620 38.5951357 44.0614435  
19 H 45.4970689 38.2080056 44.9875926  
20 H 45.8933572 39.6948140 44.0968817  
21 C 45.2008761 38.0595828 42.8919033  
22 N 45.1389706 38.6285463 41.6326103  
23 H 45.5922512 39.5043283 41.3226686  
24 C 44.4146603 37.8319046 40.8352237  
25 H 44.2202561 38.0150161 39.7840525  
26 N 43.9799872 36.7723574 41.5213471  
27 C 44.4643588 36.9076828 42.8073908  
28 H 44.2777606 36.1832740 43.5912034  
29 Fe 43.0981069 35.1485546 40.8191981  
30 O 41.5506507 32.7595067 40.8816802  
31 O 42.3982817 33.4172394 40.1600760  
32 C 40.9083729 35.4839692 42.5801392  
33 O 41.3406721 35.6563667 41.3704801  
34 O 39.8632306 35.8839228 43.0488953  
35 C 41.8828596 34.6710613 43.4732747  
36 O 42.9460214 34.3078134 42.9746334  
37 C 41.4869657 34.3786647 44.8810299  
38 C 40.6516372 33.0872424 45.0024831  
39 C 40.3088718 32.7779883 46.4841048  
40 O 40.0407862 33.7627032 47.2096045  
41 O 40.3268522 31.5734089 46.8340012  
42 H 39.7068973 33.2186614 44.4453904  
43 H 41.1792970 32.2224356 44.5691031  
44 H 42.4043705 34.2899676 45.4790498  
45 H 40.8784493 35.2055482 45.2718537  
46 N 46.9919193 28.6039768 37.4526032  
47 C 46.9655038 29.9413585 36.7664732  
48 C 48.1643784 30.0047241 35.7742763  
49 O 48.3443811 31.1032543 35.2270485  
50 C 46.9197792 31.0716426 37.7887923  
51 C 45.6996070 31.0726328 38.7247324  
52 C 44.4080575 31.6370821 38.1403513  
53 N 43.7424747 30.7300625 37.1923367  
54 C 42.7514210 31.1401050 36.3753991  
55 N 42.1049255 30.2158721 35.6227936

56 N 42.3775952 32.4037531 36.3239116  
57 O 48.7927232 28.9239458 35.5850013  
58 H 46.0576218 29.9540440 36.1449630  
59 H 47.8408482 31.0343865 38.3944078  
60 H 46.9630218 32.0173003 37.2297367  
61 H 45.5221190 30.0678682 39.1572084  
62 H 45.9435916 31.7142642 39.5834240  
63 H 43.7134366 31.8994602 38.9542778  
64 H 44.6197474 32.5847882 37.6262158  
65 H 43.8318352 29.7279630 37.3469697  
66 H 42.4862173 29.2827682 35.4760156  
67 H 41.3080969 30.5303718 35.0631559  
68 H 41.7177750 32.6994639 35.6062840  
69 H 42.8049748 33.2249458 36.8488626  
70 H 47.5793947 27.9905040 36.8526881  
71 H 47.4615040 28.6565613 38.3774389  
72 H 46.0420453 28.2053115 37.5699496  
73 H 43.3926538 36.9378825 36.0272235  
74 H 47.0090072 38.3551992 44.0641523  
75 H 48.9229706 35.3638515 39.3824083

**AI-TS-0.010**

1 C 48.5366658 34.4362838 39.0988595  
2 H 48.2474618 34.4744802 38.0368855  
3 H 49.2519149 33.6089987 39.2105354  
4 C 47.2960746 34.2295153 39.9083531  
5 N 47.2365187 33.9025887 41.2533249  
6 H 48.0246088 33.7604593 41.8957222  
7 C 45.9458272 33.9369765 41.6422190  
8 H 45.6178601 33.7829440 42.6674630  
9 N 45.1573857 34.2362385 40.6159007  
10 C 45.9882758 34.4193819 39.5347622  
11 H 45.5994890 34.7121332 38.5668209  
12 C 42.5496917 36.5597337 36.6524691  
13 H 42.1370412 37.5282570 36.9678290  
14 H 41.7607364 35.9869467 36.1426083  
15 C 43.0051442 35.7896471 37.8888101  
16 O 42.9537118 34.5216182 37.9229601  
17 O 43.3731057 36.4528495 38.8874833  
18 C 46.1019563 38.6721129 44.2084215  
19 H 45.6827244 38.2433957 45.1298189  
20 H 46.0788014 39.7680497 44.3071296  
21 C 45.3065464 38.2229629 43.0394860  
22 N 45.2875484 38.8472681 41.8071520  
23 H 45.7776694 39.7098731 41.5260839  
24 C 44.5433576 38.1183448 40.9683189  
25 H 44.3849891 38.3611847 39.9221752  
26 N 44.0437741 37.0555634 41.5980035  
27 C 44.5108805 37.1152681 42.8954835  
28 H 44.2580339 36.3625310 43.6382381  
29 Fe 43.3807335 35.3650716 40.6741738  
30 O 40.1832676 32.1153564 41.9615011  
31 O 41.4479252 32.4602089 42.0648887  
32 C 40.4989690 35.3523687 41.4228371  
33 O 41.2578396 35.4095266 40.4739367  
34 O 40.4871219 34.7435130 42.5105008  
35 C 41.8357883 33.7190991 42.9119882  
36 O 42.8985328 34.1540843 42.4599915

37 C 41.5927083 33.5033122 44.3948264  
38 C 40.2302090 32.9940357 44.8716386  
39 C 40.2378838 32.7622981 46.4053258  
40 O 40.1765404 33.7890846 47.1215145  
41 O 40.3299580 31.5748046 46.8076649  
42 H 39.4590798 33.7372994 44.6227708  
43 H 39.9876961 32.0509022 44.3657752  
44 H 42.3862847 32.8061444 44.7092278  
45 H 41.8196882 34.4694667 44.8739785  
46 N 46.9436996 28.6418670 37.5139880  
47 C 46.8820405 29.9731291 36.8188975  
48 C 48.0723930 30.0488212 35.8128080  
49 O 48.2181285 31.1381810 35.2369982  
50 C 46.8264419 31.1135666 37.8320403  
51 C 45.6412395 31.0864116 38.8158208  
52 C 44.3236849 31.6765361 38.3150255  
53 N 43.6376863 30.8203607 37.3425108  
54 C 42.6687324 31.2530424 36.5063889  
55 N 42.0332460 30.3210804 35.7487536  
56 N 42.3071202 32.5179434 36.4462124  
57 O 48.7317162 28.9829187 35.6448946  
58 H 45.9667824 29.9605428 36.2081992  
59 H 47.7673217 31.1131750 38.4081688  
60 H 46.8229426 32.0553071 37.2648433  
61 H 45.4718069 30.0660739 39.2134958  
62 H 45.9239939 31.6888855 39.6899464  
63 H 43.6649663 31.8711740 39.1798856  
64 H 44.5015451 32.6576262 37.8553573  
65 H 43.7042602 29.8148596 37.4787448  
66 H 42.4695205 29.4196353 35.5570786  
67 H 41.2859454 30.6438662 35.1269101  
68 H 41.6541514 32.8063973 35.7176485  
69 H 42.6390538 33.3484571 37.0613835  
70 H 47.5375816 28.0372533 36.9116108  
71 H 47.4229848 28.7067386 38.4329745  
72 H 46.0032965 28.2251567 37.6437841  
73 H 43.3467719 36.7893697 35.9453640  
74 H 47.1580056 38.4096967 44.1454553  
75 H 49.0603267 35.3583145 39.3512597

**AI-IM-0.010**

1 C 48.3789249 34.4200958 39.0976071  
2 H 48.0612810 34.4841396 38.0451963  
3 H 49.0966770 33.5891502 39.1723592  
4 C 47.1590684 34.1781617 39.9313202  
5 N 47.1428066 33.8325642 41.2712012  
6 H 47.9449351 33.7487665 41.9055347  
7 C 45.8567843 33.7547543 41.6729508  
8 H 45.5660151 33.5718153 42.7051529  
9 N 45.0312620 33.9939605 40.6619194  
10 C 45.8326540 34.2636098 39.5730657  
11 H 45.4096747 34.5229037 38.6061404  
12 C 42.4886334 36.6255362 36.7507127  
13 H 42.1982357 37.5618579 37.2432341  
14 H 41.6094033 36.2581641 36.1916254  
15 C 42.8355889 35.5417883 37.769218  
16 O 43.2919660 34.4409274 37.3817118  
17 O 42.5762026 35.8025237 38.9890471

18 C 45.8469981 38.4821693 43.9848228  
 19 H 45.3993637 38.1125321 44.9188306  
 20 H 45.7694061 39.5816061 43.9917661  
 21 C 45.1132980 37.9055601 42.8255820  
 22 N 45.0986413 38.4284404 41.5469750  
 23 H 45.5828732 39.2801024 41.2245137  
 24 C 44.3453149 37.6264143 40.7718334  
 25 H 44.1732705 37.7944569 39.7122408  
 26 N 43.8435481 36.6159262 41.4797867  
 27 C 44.3203072 36.7847962 42.7655174  
 28 H 44.0650096 36.1009196 43.5701049  
 29 Fe 43.0281978 34.7953715 40.7224227  
 30 O 41.4893575 32.4562480 41.9113269  
 31 O 41.8541255 33.0002862 40.6146775  
 32 C 40.8254967 36.6480359 43.3031348  
 33 O 40.4908671 36.2181553 42.2705811  
 34 O 41.1425484 37.0677864 44.3362040  
 35 C 41.9678541 33.1435408 42.9475498  
 36 O 42.6899276 34.1195030 42.7972939  
 37 C 41.5601390 32.5949157 44.2864964  
 38 C 40.4656888 33.3887132 45.0133287  
 39 C 40.2295763 32.8656358 46.4561874  
 40 O 39.7958830 33.7118793 47.2678694  
 41 O 40.4850458 31.6602798 46.7024766  
 42 H 40.7319958 34.4520090 45.0939817  
 43 H 39.5128406 33.3382140 44.4563216  
 44 H 41.2538965 31.5463993 44.1963276  
 45 H 42.4668814 32.6318727 44.9044594  
 46 N 46.9751012 28.5523653 37.4607523  
 47 C 46.9397066 29.8936609 36.7829427  
 48 C 48.1419143 29.9694248 35.7953333  
 49 O 48.3212442 31.0697904 35.2528065  
 50 C 46.8727575 31.0121977 37.8174916  
 51 C 45.6586693 30.9683448 38.7623184  
 52 C 44.3537577 31.5208247 38.1955904  
 53 N 43.7088041 30.6145855 37.2321791  
 54 C 42.7389932 31.0243326 36.3921491  
 55 N 42.1056509 30.1024304 35.6216402  
 56 N 42.3573005 32.2849343 36.3389496  
 57 O 48.7735495 28.8894819 35.6021028  
 58 H 46.0344657 29.9002358 36.1574957  
 59 H 47.7977352 30.9914119 38.4175528  
 60 H 46.8879339 31.9665855 37.2722656  
 61 H 45.5002878 29.9503866 39.1701667  
 62 H 45.8942222 31.5924683 39.6347470  
 63 H 43.6569869 31.7554322 39.0193776  
 64 H 44.5476737 32.4794012 37.6961115  
 65 H 43.8117481 29.6111095 37.3784034  
 66 H 42.5176765 29.1887144 35.4416754  
 67 H 41.3503464 30.4388261 35.0185595  
 68 H 41.7181990 32.5698756 35.5999469  
 69 H 42.7891256 33.1141517 36.8546719  
 70 H 47.5634428 27.9459507 36.8550576  
 71 H 47.4473700 28.6056925 38.3841221  
 72 H 46.0255010 28.1553976 37.5800752  
 73 H 43.2893124 36.8471008 36.0451000  
 74 H 46.9169763 38.2756154 44.0082594  
 75 H 48.9268680 35.3284126 39.3481789

**BI-RC+0.0050**

1 C 47.3514845 31.4349860 34.2290854  
 2 H 46.8750640 31.8366891 33.3255537  
 3 H 47.7384241 30.4458349 33.9407763  
 4 C 46.3173498 31.3144666 35.3056266  
 5 N 46.3611354 30.3984262 36.3408292  
 6 H 47.0983312 29.7035855 36.5040565  
 7 C 45.2676190 30.5717814 37.1121624  
 8 H 45.0487387 29.9869811 38.0030372  
 9 N 44.5121627 31.5507589 36.6325083  
 10 C 45.1504466 32.0185467 35.5030943  
 11 H 44.7230548 32.8075958 34.8883579  
 12 C 42.1476386 36.1267359 35.0315789  
 13 H 42.3244001 36.7636016 35.9092516  
 14 H 41.1115211 36.2758293 34.6870190  
 15 C 42.3274711 34.6374457 35.3682920  
 16 O 41.8897060 33.7834492 34.5946869  
 17 O 42.9496761 34.3835839 36.4703492  
 18 C 47.6196450 33.8773113 40.7689593  
 19 H 47.3164633 33.2452975 41.6168544  
 20 H 47.9058069 34.8640955 41.1709219  
 21 C 46.4839497 33.9898853 39.8181759  
 22 N 46.3311792 34.9909316 38.8792444  
 23 H 46.9543063 35.7902040 38.7292964  
 24 C 45.2028789 34.7371619 38.1818718  
 25 H 44.8094618 35.3435435 37.3698179  
 26 N 44.6204092 33.6366117 38.6239974  
 27 C 45.4052604 33.1600505 39.6421594  
 28 H 45.1711792 32.2442740 40.1788398  
 29 Fe 42.9514848 32.7005396 37.5926088  
 30 O 40.4334344 31.5995916 36.5306167  
 31 O 41.6666247 31.5733236 36.5724874  
 32 C 41.7078167 32.8929376 40.1985095  
 33 O 41.6391471 33.2737838 38.9721890  
 34 O 41.3216848 33.4771607 41.1967320  
 35 C 42.4314652 31.5200651 40.3676131  
 36 O 42.9718560 31.0445358 39.3644482  
 37 C 42.5093228 30.8739687 41.7169846  
 38 C 41.4962216 29.7307507 41.9539109  
 39 C 41.7397683 29.0188949 43.3254080  
 40 O 41.9975949 29.7539311 44.3130482  
 41 O 41.6580442 27.7732137 43.3148042  
 42 H 40.4697009 30.1384035 41.9507056  
 43 H 41.5683285 28.9643756 41.1655741  
 44 H 43.5247402 30.4555189 41.8038328  
 45 H 42.3540886 31.6316257 42.4955023  
 46 N 43.7769854 27.9246477 31.3576542  
 47 C 43.8388751 29.4145312 31.5195795  
 48 C 45.0855889 30.0070499 30.8100980  
 49 O 45.2797757 31.2290418 31.0151312  
 50 C 43.7484573 29.8198283 32.9888322  
 51 C 42.4682686 29.3693815 33.7029751  
 52 C 41.1798039 29.8165502 33.0227114  
 53 N 40.8684257 31.2205732 33.2467739  
 54 C 39.8177509 31.8427692 32.6852698  
 55 N 38.9943120 31.1730662 31.8709051  
 56 N 39.6167971 33.1236167 33.0016650

57 O 45.7440606 29.2342456 30.0785844  
 58 H 42.9781909 29.8175658 30.9649530  
 59 H 44.6272507 29.4244567 33.5281123  
 60 H 43.8430109 30.9149795 32.9977268  
 61 H 42.4366311 28.2711253 33.7705360  
 62 H 42.4856343 29.7290795 34.7460238  
 63 H 41.2473704 29.6314280 31.9395412  
 64 H 40.3470940 29.1957810 33.3723280  
 65 H 41.4669868 31.7969671 33.8357680  
 66 H 39.1266220 30.1825626 31.6258454  
 67 H 38.2448289 31.6546239 31.3835188  
 68 H 40.3480495 33.5919999 33.5417869  
 69 H 38.9160254 33.7330069 32.5693842  
 70 H 44.4471127 27.4515817 31.9909464  
 71 H 42.8209107 27.5266297 31.5253218  
 72 H 44.0666986 27.6535859 30.4054529  
 73 H 42.8447137 36.4262048 34.2489731  
 74 H 48.5317154 33.4598651 40.3424228  
 75 H 48.2265509 32.0281375 34.4945984

**BI-TS+0.0050**

1 C 47.2962863 31.4439220 34.2812600  
 2 H 46.8115444 31.8344699 33.3770969  
 3 H 47.6553268 30.4393573 34.0098065  
 4 C 46.2809055 31.3695213 35.3806892  
 5 N 46.3305758 30.4734728 36.4347812  
 6 H 47.0575299 29.7656485 36.5889229  
 7 C 45.2659777 30.6883793 37.2325942  
 8 H 45.0569121 30.1452545 38.1512444  
 9 N 44.5195400 31.6763479 36.7518595  
 10 C 45.1353983 32.1034030 35.5936651  
 11 H 44.7067723 32.8840973 34.9717252  
 12 C 42.0984010 36.0158532 35.1681836  
 13 H 42.2817774 36.6779653 36.0256818  
 14 H 41.0638984 36.1649311 34.8193891  
 15 C 42.2549290 34.5389175 35.5690414  
 16 O 41.7288805 33.6546766 34.8956250  
 17 O 42.9483806 34.3154756 36.6412781  
 18 C 47.8211928 33.9917130 40.7797640  
 19 H 47.5001864 33.3628007 41.6229875  
 20 H 48.1776705 34.9524857 41.1889049  
 21 C 46.6703909 34.1671214 39.8605973  
 22 N 46.5570190 35.1198418 38.8659471  
 23 H 47.2077141 35.8841854 38.6691164  
 24 C 45.4103981 34.8925260 38.1973316  
 25 H 45.0416595 35.4745578 37.3573870  
 26 N 44.7834577 33.8537841 38.7174338  
 27 C 45.5482422 33.3922984 39.7561020  
 28 H 45.2410550 32.5250601 40.3319644  
 29 Fe 43.1239850 32.8192693 37.9402646  
 30 O 41.3271757 30.8456365 39.1456177  
 31 O 41.6072450 31.2124676 37.9048056  
 32 C 41.6725403 32.9141673 40.3227745  
 33 O 41.7943107 33.5751053 39.2150973  
 34 O 41.2402197 33.2936072 41.3864092  
 35 C 42.3003932 31.4485122 40.1418167  
 36 O 43.4581598 31.5972356 39.5134147  
 37 C 42.3633482 30.5871267 41.4057854

38 C 41.1526174 29.7952914 41.9154673  
 39 C 41.5418256 29.0085058 43.2115929  
 40 O 41.8873425 29.7006070 44.2097958  
 41 O 41.5070866 27.7598832 43.1552750  
 42 H 40.3288719 30.4879956 42.1579914  
 43 H 40.8081112 29.0689273 41.1635494  
 44 H 43.1968838 29.8981606 41.2168782  
 45 H 42.6711043 31.2704567 42.2108303  
 46 N 43.7849730 27.9065865 31.3900615  
 47 C 43.8464468 29.3962886 31.5501081  
 48 C 45.0876097 29.9911473 30.8323728  
 49 O 45.2732289 31.2161022 31.0302644  
 50 C 43.7575540 29.8083193 33.0185835  
 51 C 42.4798682 29.3539928 33.7358973  
 52 C 41.1869102 29.7862379 33.0522149  
 53 N 40.8162043 31.1640460 33.3429952  
 54 C 39.7838299 31.7942626 32.7570637  
 55 N 39.0224116 31.1563465 31.8628073  
 56 N 39.5355374 33.0533790 33.1299542  
 57 O 45.7470183 29.2201097 30.1009520  
 58 H 42.9838339 29.7957615 30.9959846  
 59 H 44.6387092 29.4188521 33.5585738  
 60 H 43.8461248 30.9041442 33.0220520  
 61 H 42.4586894 28.2563795 33.8119513  
 62 H 42.4919999 29.7175703 34.7790157  
 63 H 41.2792008 29.6660274 31.9620547  
 64 H 40.3771997 29.1124393 33.3485149  
 65 H 41.3599909 31.7121988 34.0063478  
 66 H 39.1667914 30.1727904 31.5966019  
 67 H 38.2742932 31.6415116 31.3765498  
 68 H 40.2258360 33.5062415 33.7313216  
 69 H 38.8665212 33.6779645 32.6687178  
 70 H 44.4523341 27.4336595 32.0262507  
 71 H 42.8278818 27.5101175 31.5542177  
 72 H 44.0773372 27.6356148 30.4382984  
 73 H 42.7928671 36.2991278 34.3772730  
 74 H 48.6912847 33.5219666 40.3211295  
 75 H 48.1899152 32.0232157 34.5134523

**BI-IM+0.0050**

1 C 47.5476076 31.4612801 34.0514426  
 2 H 47.1163362 31.8687857 33.1283990  
 3 H 47.9723021 30.4854476 33.7716927  
 4 C 46.4591189 31.3159375 35.0676810  
 5 N 46.4646888 30.4136091 36.1157929  
 6 H 47.1924442 29.7209698 36.3219012  
 7 C 45.3458903 30.5953171 36.8473442  
 8 H 45.0927458 30.0452067 37.7524929  
 9 N 44.6096276 31.5677016 36.3234889  
 10 C 45.2850759 32.0185363 35.2111977  
 11 H 44.8792181 32.7944495 34.5667404  
 12 C 42.0591295 36.1114513 34.9478139  
 13 H 42.1711747 36.8103184 35.7895885  
 14 H 41.0411485 36.2094964 34.5382267  
 15 C 42.2577947 34.6669975 35.4221871  
 16 O 41.7622009 33.7226947 34.7941387  
 17 O 42.9393474 34.5228318 36.5015532  
 18 C 47.6167363 33.8651008 40.7653397



|       |            |            |            |
|-------|------------|------------|------------|
| 19 H  | 47.3066638 | 33.2250491 | 41.6045590 |
| 20 H  | 47.9007098 | 34.8486200 | 41.1767181 |
| 21 C  | 46.4923923 | 33.9907281 | 39.8023299 |
| 22 N  | 46.3363908 | 35.0339205 | 38.9113665 |
| 23 H  | 46.9506697 | 35.8463914 | 38.8027044 |
| 24 C  | 45.2267048 | 34.7933220 | 38.1818056 |
| 25 H  | 44.8351633 | 35.4381609 | 37.3996410 |
| 26 N  | 44.6570255 | 33.6594733 | 38.5595948 |
| 27 C  | 45.4368248 | 33.1449321 | 39.5668444 |
| 28 H  | 45.2157046 | 32.1849321 | 40.0279830 |
| 29 Fe | 43.1697898 | 32.7036302 | 37.3452250 |
| 30 O  | 41.8991398 | 31.3447580 | 39.6046178 |
| 31 O  | 42.0344552 | 31.3496707 | 38.1710139 |
| 32 C  | 41.3313414 | 33.8502091 | 40.1993690 |
| 33 O  | 41.2395071 | 34.0184246 | 39.0526040 |
| 34 O  | 41.4253346 | 33.7586575 | 41.3563768 |
| 35 C  | 42.8994296 | 30.7252335 | 40.2646542 |
| 36 O  | 43.9248883 | 30.3503155 | 39.7370100 |
| 37 C  | 42.5639063 | 30.5731025 | 41.7317585 |
| 38 C  | 41.4969545 | 29.4930688 | 42.0061801 |
| 39 C  | 41.6645754 | 28.8642243 | 43.4148831 |
| 40 O  | 41.8883576 | 29.6465912 | 44.3776214 |
| 41 O  | 41.5823334 | 27.6190253 | 43.4663089 |
| 42 H  | 40.4882052 | 29.9347894 | 41.9264282 |
| 43 H  | 41.5591860 | 28.6760093 | 41.2709134 |
| 44 H  | 43.5036557 | 30.2911021 | 42.2196617 |
| 45 H  | 42.2419791 | 31.5347878 | 42.1553950 |
| 46 N  | 43.7683293 | 27.9154719 | 31.3429024 |
| 47 C  | 43.8149927 | 29.4060237 | 31.5043505 |
| 48 C  | 45.0463634 | 30.0169085 | 30.7837524 |
| 49 O  | 45.2058585 | 31.2472145 | 30.9677805 |
| 50 C  | 43.7332236 | 29.8100319 | 32.9746503 |
| 51 C  | 42.4625716 | 29.3504022 | 33.7004185 |
| 52 C  | 41.1663988 | 29.7894276 | 33.0289189 |
| 53 N  | 40.8146013 | 31.1744949 | 33.3112118 |
| 54 C  | 39.7774852 | 31.8073787 | 32.7354029 |
| 55 N  | 38.9868776 | 31.1587927 | 31.8745802 |
| 56 N  | 39.5542300 | 33.0757992 | 33.0902188 |
| 57 O  | 45.7276009 | 29.2487873 | 30.0681334 |
| 58 H  | 42.9443528 | 29.7980239 | 30.9578662 |
| 59 H  | 44.6195857 | 29.4237956 | 33.5070170 |
| 60 H  | 43.8193118 | 30.9054314 | 32.9812054 |
| 61 H  | 42.4402959 | 28.2523089 | 33.7713033 |
| 62 H  | 42.4875928 | 29.7088047 | 34.7448320 |
| 63 H  | 41.2458277 | 29.6561273 | 31.9391005 |
| 64 H  | 40.3502347 | 29.1301662 | 33.3416357 |
| 65 H  | 41.4037412 | 31.7406572 | 33.9179416 |
| 66 H  | 39.1283728 | 30.1744380 | 31.6093256 |
| 67 H  | 38.2370745 | 31.6438146 | 31.3909495 |
| 68 H  | 40.2643474 | 33.5298202 | 33.6703952 |
| 69 H  | 38.8800379 | 33.7004823 | 32.6376299 |
| 70 H  | 44.4430469 | 27.4485334 | 31.9760759 |
| 71 H  | 42.8150576 | 27.5121789 | 31.5126497 |
| 72 H  | 44.0578541 | 27.6468656 | 30.3902191 |
| 73 H  | 42.7907723 | 36.3885666 | 34.1888850 |
| 74 H  | 48.5312424 | 33.4519602 | 40.3398276 |
| 75 H  | 48.3857974 | 32.0719267 | 34.3870253 |

**BI-RC+0.010**

|       |            |            |            |
|-------|------------|------------|------------|
| 1 C   | 47.3128767 | 31.4094248 | 34.1169680 |
| 2 H   | 46.8575712 | 31.8111356 | 33.2016695 |
| 3 H   | 47.6907559 | 30.4154049 | 33.8335682 |
| 4 C   | 46.2576094 | 31.2972441 | 35.1734094 |
| 5 N   | 46.2262590 | 30.3207329 | 36.1503774 |
| 6 H   | 46.9060814 | 29.5610844 | 36.2658201 |
| 7 C   | 45.1350721 | 30.5197385 | 36.9217294 |
| 8 H   | 44.8570690 | 29.8916924 | 37.7654653 |
| 9 N   | 44.4595656 | 31.5787645 | 36.4972118 |
| 10 C  | 45.1397002 | 32.0677093 | 35.4031844 |
| 11 H  | 44.7648610 | 32.9127959 | 34.8315937 |
| 12 C  | 42.0968931 | 36.1484670 | 34.9294168 |
| 13 H  | 42.2516041 | 36.7852570 | 35.8131199 |
| 14 H  | 41.0731986 | 36.2973754 | 34.5517629 |
| 15 C  | 42.2763683 | 34.6586146 | 35.2734533 |
| 16 O  | 41.7341202 | 33.8074927 | 34.5737606 |
| 17 O  | 43.0240597 | 34.4155228 | 36.3029881 |
| 18 C  | 47.4674572 | 33.8737543 | 40.6970987 |
| 19 H  | 47.1328205 | 33.2489695 | 41.5391950 |
| 20 H  | 47.7168958 | 34.8706898 | 41.1017398 |
| 21 C  | 46.3717914 | 33.9616746 | 39.6948378 |
| 22 N  | 46.2274469 | 34.9781428 | 38.7691376 |
| 23 H  | 46.8382275 | 35.7899984 | 38.6535979 |
| 24 C  | 45.1303769 | 34.7121376 | 38.0251184 |
| 25 H  | 44.7280305 | 35.3101468 | 37.2097691 |
| 26 N  | 44.5663536 | 33.5865660 | 38.4265371 |
| 27 C  | 45.3264342 | 33.1036809 | 39.4603754 |
| 28 H  | 45.0965598 | 32.1675169 | 39.9607235 |
| 29 Fe | 43.0121300 | 32.7265747 | 37.4708696 |
| 30 O  | 40.4230834 | 31.5480480 | 36.7422399 |
| 31 O  | 41.5954689 | 31.8440335 | 36.5970186 |
| 32 C  | 41.8453954 | 32.9562985 | 40.1244094 |
| 33 O  | 41.7989995 | 33.3358996 | 38.9019741 |
| 34 O  | 41.4922132 | 33.5770772 | 41.1188956 |
| 35 C  | 42.4731994 | 31.5394573 | 40.3203579 |
| 36 O  | 42.9215304 | 30.9647257 | 39.3288781 |
| 37 C  | 42.5957953 | 30.9800295 | 41.7071792 |
| 38 C  | 41.5553827 | 29.9060986 | 42.0912821 |
| 39 C  | 41.8572573 | 29.3243651 | 43.5048823 |
| 40 O  | 42.1379904 | 30.1474076 | 44.4126589 |
| 41 O  | 41.8030028 | 28.0776269 | 43.6122463 |
| 42 H  | 40.5489421 | 30.3592606 | 42.1071936 |
| 43 H  | 41.5469905 | 29.0790320 | 41.3650799 |
| 44 H  | 43.5967278 | 30.5194663 | 41.7581855 |
| 45 H  | 42.5236217 | 31.7934413 | 42.4398047 |
| 46 N  | 43.7285975 | 27.9422830 | 31.3229152 |
| 47 C  | 43.7939640 | 29.4303541 | 31.4918904 |
| 48 C  | 45.0608403 | 30.0282646 | 30.8214621 |
| 49 O  | 45.2536934 | 31.2522620 | 31.0549153 |
| 50 C  | 43.6686745 | 29.8326778 | 32.9616609 |
| 51 C  | 42.3782297 | 29.3783315 | 33.6570329 |
| 52 C  | 41.0943439 | 29.7798615 | 32.9403843 |
| 53 N  | 40.7183100 | 31.1698241 | 33.1682484 |
| 54 C  | 39.6567898 | 31.7551036 | 32.5809845 |
| 55 N  | 38.8728077 | 31.0651901 | 31.7565947 |
| 56 N  | 39.4127608 | 33.0338134 | 32.9022409 |
| 57 O  | 45.7387206 | 29.2701621 | 30.0986529 |

58 H 42.9468658 29.8401091 30.9212851  
59 H 44.5385277 29.4377142 33.5169218  
60 H 43.7624340 30.9282209 32.9693713  
61 H 42.3678016 28.2828158 33.7566465  
62 H 42.3652453 29.7658242 34.6916739  
63 H 41.1966816 29.6026330 31.8587477  
64 H 40.2784281 29.1241973 33.2623542  
65 H 41.3316223 31.7848500 33.6964588  
66 H 39.0269971 30.0716201 31.5247994  
67 H 38.0919211 31.5077797 31.2776477  
68 H 40.1181918 33.5269738 33.4477018  
69 H 38.7321207 33.6364241 32.4356485  
70 H 44.4281373 27.4634202 31.9178266  
71 H 42.7811501 27.5399544 31.5359888  
72 H 43.9570915 27.6599016 30.3568655  
73 H 42.8206400 36.4451402 34.1703103  
74 H 48.4051418 33.4672658 40.3181769  
75 H 48.1881607 31.9891631 34.4099673

**BI-TS+0.010**

1 C 47.1604966 31.4039018 34.2014309  
2 H 46.6952996 31.8014682 33.2883452  
3 H 47.5111672 30.3972994 33.9258793  
4 C 46.1192486 31.3211418 35.2771196  
5 N 46.1181488 30.3674781 36.2810620  
6 H 46.8179298 29.6269472 36.4018178  
7 C 45.0243004 30.5523434 37.0484525  
8 H 44.7645078 29.9577615 37.9213147  
9 N 44.3127401 31.5808829 36.6022724  
10 C 44.9787695 32.0633414 35.4935274  
11 H 44.5785501 32.8763911 34.8929016  
12 C 41.8802829 35.8895834 35.1029073  
13 H 42.0141982 36.5628337 35.9623687  
14 H 40.8703710 36.0366500 34.6887259  
15 C 42.0054224 34.4157765 35.5359551  
16 O 41.4853343 33.5279788 34.8727823  
17 O 42.6798805 34.2099266 36.6333494  
18 C 47.6131393 33.9391174 40.7354776  
19 H 47.2873637 33.3164306 41.5824669  
20 H 47.9110683 34.9249200 41.1358263  
21 C 46.4867391 34.0484023 39.7741089  
22 N 46.3530237 35.0188617 38.7964917  
23 H 46.9765461 35.8121179 38.6324076  
24 C 45.2292041 34.7392876 38.0958556  
25 H 44.8323998 35.3241044 37.2707206  
26 N 44.6501025 33.6589339 38.5720526  
27 C 45.4107663 33.2132883 39.6157528  
28 H 45.1237267 32.3180945 40.1628480  
29 Fe 42.8756126 32.6443876 37.8473292  
30 O 40.9881562 30.9861996 39.2845269  
31 O 41.1109017 31.4150058 38.0122271  
32 C 41.8908983 32.8641725 40.4665927  
33 O 41.9228787 33.5670722 39.3895127  
34 O 41.7880682 33.2390056 41.6157721  
35 C 42.1433644 31.3009737 40.0788941  
36 O 43.2421324 31.3260112 39.3014859  
37 C 42.2498603 30.3075042 41.2478815  
38 C 41.1534032 30.2194127 42.3220523

39 C 41.6490352 29.3808642 43.5400862  
40 O 41.9693886 30.0208112 44.5827026  
41 O 41.7275698 28.1364226 43.4079963  
42 H 40.8975633 31.2252122 42.6777547  
43 H 40.2562186 29.7407823 41.8973321  
44 H 42.3985322 29.3188620 40.7880722  
45 H 43.2001243 30.5854173 41.7321964  
46 N 43.6704389 27.9442117 31.3355276  
47 C 43.6869960 29.4310945 31.5197553  
48 C 44.9268415 30.0588732 30.8222575  
49 O 45.0950775 31.2879725 31.0469770  
50 C 43.5936630 29.8256497 32.9955024  
51 C 42.3850018 29.2772015 33.7659812  
52 C 41.0195710 29.5619655 33.1506034  
53 N 40.6073783 30.9525511 33.3020911  
54 C 39.6218575 31.5440774 32.6026626  
55 N 38.9468517 30.8798865 31.6667060  
56 N 39.3365823 32.8171846 32.9177794  
57 O 45.6144388 29.3114800 30.0966156  
58 H 42.8099963 29.8159525 30.9764525  
59 H 44.5164655 29.5007002 33.5091853  
60 H 43.6042973 30.9249898 32.9998770  
61 H 42.4667799 28.1855238 33.8573943  
62 H 42.4119502 29.6562738 34.8035804  
63 H 41.0466367 29.3267739 32.0785314  
64 H 40.2784775 28.8843826 33.6000670  
65 H 41.0336745 31.5153272 34.0336499  
66 H 39.0792746 29.8737168 31.4827225  
67 H 38.2471416 31.3447480 31.0910929  
68 H 39.9798087 33.3078008 33.5357133  
69 H 38.6892968 33.4182212 32.4073729  
70 H 44.3983805 27.4812117 31.9085747  
71 H 42.7424129 27.5115122 31.5645252  
72 H 43.8871846 27.6903847 30.3599050  
73 H 42.6237981 36.1556609 34.3516051  
74 H 48.5199066 33.5009365 40.3185389  
75 H 48.0583223 31.9678448 34.4543035

**BI-IM+0.010**

1 C 47.2260014 31.3416059 34.1721529  
2 H 46.7393744 31.7198993 33.2609280  
3 H 47.6154289 30.3491624 33.8997765  
4 C 46.2056061 31.2391113 35.2645569  
5 N 46.2461980 30.3169104 36.2916390  
6 H 46.9622071 29.5953715 36.4256905  
7 C 45.1664186 30.5109230 37.0829192  
8 H 44.9394086 29.9158008 37.9651984  
9 N 44.4273474 31.5107919 36.6270789  
10 C 45.0598161 31.9693063 35.4930365  
11 H 44.6383458 32.7710643 34.8910980  
12 C 41.7592646 35.7881246 34.9215355  
13 H 41.8297846 36.5573556 35.7069190  
14 H 40.7665593 35.8452732 34.4511259  
15 C 41.9586258 34.3914385 35.5370692  
16 O 41.3546760 33.4182175 35.0902448  
17 O 42.8058307 34.3280698 36.5196538  
18 C 47.4862577 33.8298785 40.7797319  
19 H 47.1992550 33.1807390 41.6205008

20 H 47.7535616 34.8184207 41.1970653  
21 C 46.3319543 33.9402432 39.8498018  
22 N 46.1714164 34.9495244 38.9168943  
23 H 46.8081574 35.7305665 38.7440661  
24 C 44.9973774 34.7270109 38.2775275  
25 H 44.5873093 35.3397314 37.4797722  
26 N 44.4000786 33.6478252 38.7461583  
27 C 45.2181118 33.1435264 39.7242022  
28 H 44.9486954 32.2378698 40.2637577  
29 Fe 42.8261179 32.5542109 37.6240105  
30 O 40.7442295 31.0493670 39.0382614  
31 O 41.0303893 31.9719631 37.9897233  
32 C 42.3423789 33.4951815 41.8138092  
33 O 41.3926991 33.5624336 41.1516665  
34 O 43.2945664 33.4873537 42.4873882  
35 C 41.7742200 30.7098172 39.7722937  
36 O 42.9161891 31.1363891 39.5416650  
37 C 41.4008189 29.7881814 40.9173567  
38 C 41.8136135 30.3404848 42.2888220  
39 C 41.8659993 29.3410698 43.4783272  
40 O 42.0006533 29.8839307 44.6132202  
41 O 41.8232762 28.1177798 43.2432810  
42 H 42.8280250 30.7689218 42.2198076  
43 H 41.1460912 31.1626694 42.5957662  
44 H 40.3206823 29.5909528 40.8724699  
45 H 41.9026466 28.8214275 40.7601573  
46 N 43.6684293 27.9750829 31.3550415  
47 C 43.6639168 29.4610338 31.5526215  
48 C 44.8903820 30.1161805 30.8533148  
49 O 45.0342205 31.3500450 31.0807972  
50 C 43.5739810 29.8397357 33.0330033  
51 C 42.3803574 29.2649213 33.8074210  
52 C 41.0057629 29.5452017 33.2093765  
53 N 40.5714440 30.9223169 33.4063117  
54 C 39.6047593 31.5358587 32.6982805  
55 N 38.9765801 30.9098237 31.7039503  
56 N 39.2931656 32.7887391 33.0628530  
57 O 45.5909307 29.3830213 30.1264208  
58 H 42.7766750 29.8345009 31.0176711  
59 H 44.5059803 29.5270014 33.5368811  
60 H 43.5647857 30.9388115 33.0488155  
61 H 42.4766785 28.1729983 33.8805918  
62 H 42.4143270 29.6289417 34.8501188  
63 H 41.0332608 29.3465985 32.1304210  
64 H 40.2796248 28.8386884 33.6374125  
65 H 40.9463976 31.4469561 34.1931769  
66 H 39.1124024 29.9097692 31.4930910  
67 H 38.2786142 31.3874092 31.1372989  
68 H 39.8917091 33.2376373 33.7562131  
69 H 38.6826659 33.4188083 32.5404487  
70 H 44.4075771 27.5145153 31.9157954  
71 H 42.7474687 27.5285584 31.5871815  
72 H 43.8750600 27.7354554 30.3740433  
73 H 42.5339050 36.0063987 34.1864466  
74 H 48.4118471 33.4430581 40.3534438  
75 H 48.0967665 31.9459869 34.4262373

BI-RC-0.0050

1 C 47.4700667 31.5732007 34.3113375  
2 H 46.9871743 31.9834578 33.4153097  
3 H 47.8754780 30.5906992 34.0238680  
4 C 46.4459325 31.4503204 35.3976452  
5 N 46.5438471 30.6070213 36.4886121  
6 H 47.3368116 29.9970448 36.7213083  
7 C 45.4644182 30.7988034 37.2741156  
8 H 45.2993054 30.2873500 38.2194716  
9 N 44.6592527 31.7109504 36.7444451  
10 C 45.2569185 32.1243775 35.5723006  
11 H 44.8046201 32.8741884 34.9263430  
12 C 42.4152240 36.2510713 35.1759808  
13 H 42.6615052 36.8699197 36.0481128  
14 H 41.3493004 36.4107682 34.9366788  
15 C 42.5954696 34.7549865 35.4628925  
16 O 42.3405517 33.9271054 34.5745166  
17 O 42.9890755 34.4388668 36.6421786  
18 C 47.7540333 33.8951175 40.8703567  
19 H 47.4716903 33.2605973 41.7223611  
20 H 48.0689993 34.8744059 41.2637641  
21 C 46.5988431 34.0352643 39.9502873  
22 N 46.4275027 35.0650346 39.0496389  
23 H 47.0480175 35.8762024 38.9192308  
24 C 45.2991303 34.8380767 38.3578834  
25 H 44.9178163 35.4867245 37.5759069  
26 N 44.7177047 33.7159971 38.7714093  
27 C 45.5204842 33.2078510 39.7674408  
28 H 45.2986354 32.2803714 40.2854184  
29 Fe 43.0696683 32.8200818 37.7691736  
30 O 40.9320526 31.8245942 36.4253766  
31 O 41.8643572 31.2804820 37.1465065  
32 C 41.7016028 32.8300749 40.3317018  
33 O 41.7695924 33.3206288 39.1327660  
34 O 41.1050963 33.2824948 41.2844873  
35 C 42.5286901 31.5172018 40.4906804  
36 O 43.2285744 31.1838140 39.5334012  
37 C 42.4693116 30.7518936 41.7778949  
38 C 41.5219651 29.5283998 41.7597833  
39 C 41.6005159 28.7052365 43.0979729  
40 O 41.7549220 29.3723228 44.1468412  
41 O 41.4985564 27.4651090 42.9883347  
42 H 40.4766758 29.8665529 41.6305414  
43 H 41.7718955 28.8335827 40.9395279  
44 H 43.4892124 30.3961672 41.9870199  
45 H 42.1481307 31.4190951 42.5883286  
46 N 43.5519071 28.0384248 31.4319988  
47 C 43.6769118 29.5247242 31.6218496  
48 C 44.8444334 30.0605631 30.7432272  
49 O 45.1279953 31.2600791 30.9076980  
50 C 43.8139996 29.9218180 33.0873697  
51 C 42.6139489 29.5806775 33.9781829  
52 C 41.2792665 30.1043907 33.4577075  
53 N 41.2048782 31.5521183 33.4254574  
54 C 40.1520156 32.2184528 32.9279883  
55 N 39.1859332 31.5635855 32.2437788  
56 N 40.0584990 33.5192732 33.1560350  
57 O 45.3548408 29.2467549 29.9279690  
58 H 42.7663464 29.9641128 31.1863153

59 H 44.7276249 29.4681354 33.5079479  
60 H 43.9886719 31.0063872 33.0807390  
61 H 42.5108352 28.4866520 34.0877172  
62 H 42.7937521 29.9712926 34.9931222  
63 H 41.1119461 29.7137546 32.4434675  
64 H 40.4654762 29.7154791 34.0830409  
65 H 41.7888486 32.1028396 34.0650447  
66 H 39.3127800 30.6013582 31.9160110  
67 H 38.5175850 32.1172352 31.7197173  
68 H 40.8557015 33.9602822 33.6359926  
69 H 39.3068269 34.1028991 32.7747087  
70 H 44.2012693 27.5263224 32.0585044  
71 H 42.5827880 27.6689137 31.5523890  
72 H 43.8930607 27.8448085 30.4750877  
73 H 43.0369846 36.5725856 34.3404515  
74 H 48.6445507 33.4697885 40.4076029  
75 H 48.3332411 32.1860200 34.5710481

**BI-TS-0.0050**

1 C 47.3896922 31.5504383 34.3858513  
2 H 46.8984901 31.9425457 33.4861442  
3 H 47.7777633 30.5549824 34.1192386  
4 C 46.3780488 31.4669434 35.4881880  
5 N 46.4774137 30.6406126 36.5942675  
6 H 47.2675174 30.0247800 36.8219400  
7 C 45.4103949 30.8598777 37.3880241  
8 H 45.2446738 30.3809334 38.3505598  
9 N 44.6086189 31.7744158 36.8506375  
10 C 45.1999257 32.1587409 35.6642952  
11 H 44.7525126 32.9082430 35.0158389  
12 C 42.3773742 36.2718944 35.2811353  
13 H 42.6609121 36.9217065 36.1188590  
14 H 41.3120059 36.4442080 35.0530792  
15 C 42.5411931 34.7864133 35.6378411  
16 O 42.0812981 33.9256477 34.8609836  
17 O 43.1276895 34.5053097 36.7336804  
18 C 47.9630988 33.9729269 40.9239059  
19 H 47.6687688 33.3218059 41.7589221  
20 H 48.3381017 34.9201114 41.3418207  
21 C 46.7964782 34.1903637 40.0374313  
22 N 46.6675526 35.2129039 39.1194965  
23 H 47.3125034 35.9993284 38.9742559  
24 C 45.5337796 35.0317964 38.4312457  
25 H 45.1773614 35.6836423 37.6396761  
26 N 44.9095512 33.9458716 38.8729996  
27 C 45.6805580 33.4155415 39.8811853  
28 H 45.3860272 32.5177364 40.4142439  
29 Fe 43.2860553 32.9973771 38.0675497  
30 O 41.2553791 31.0047061 39.0895976  
31 O 41.5913697 31.3655130 37.8739176  
32 C 41.6243347 33.0388210 40.2912884  
33 O 41.8491097 33.7031878 39.1925290  
34 O 41.0494318 33.4159861 41.2818914  
35 C 42.2658556 31.5846382 40.1758202  
36 O 43.4263411 31.6695954 39.5638205  
37 C 42.1926966 30.7318556 41.4582911  
38 C 41.3735670 29.4322672 41.5072333  
39 C 41.4917882 28.6635373 42.8754458

40 O 41.6490102 29.3549057 43.9095332  
41 O 41.4029326 27.4150162 42.8112892  
42 H 40.2999057 29.6598783 41.3566025  
43 H 41.6842963 28.7203679 40.7226826  
44 H 43.2415925 30.4960035 41.6923105  
45 H 41.8276636 31.3871310 42.2619242  
46 N 43.5687420 28.0322429 31.4603236  
47 C 43.6826792 29.5193875 31.6458139  
48 C 44.8546114 30.0568290 30.7725021  
49 O 45.1334220 31.2574537 30.9359943  
50 C 43.7949307 29.9340092 33.1094515  
51 C 42.5752732 29.6071296 33.9809671  
52 C 41.2549412 30.1469708 33.4396431  
53 N 41.1234692 31.5880720 33.5359416  
54 C 40.0927179 32.2610255 32.9971018  
55 N 39.1755376 31.6105842 32.2441703  
56 N 39.9678090 33.5516462 33.2569187  
57 O 45.3659404 29.2429423 29.9585682  
58 H 42.7764866 29.9487134 31.1920379  
59 H 44.6977321 29.4804304 33.5529541  
60 H 43.9753742 31.0178271 33.0938298  
61 H 42.4591685 28.5138230 34.0815616  
62 H 42.7464049 29.9861921 35.0031232  
63 H 41.1539883 29.8492212 32.3856065  
64 H 40.4188064 29.6714580 33.9680441  
65 H 41.7112777 32.1330650 34.1779093  
66 H 39.3269823 30.6580633 31.8993645  
67 H 38.5106895 32.1667292 31.7184250  
68 H 40.7131223 33.9850611 33.8284069  
69 H 39.2352637 34.1339444 32.8383663  
70 H 44.2080182 27.5219897 32.0988138  
71 H 42.5988877 27.6583037 31.5575121  
72 H 43.9326546 27.8422000 30.5100734  
73 H 42.9871730 36.5528101 34.4224742  
74 H 48.8135609 33.5165955 40.4174051  
75 H 48.2669624 32.1571005 34.6104066

**BI-IM-0.0050**

1 C 47.5183800 31.5543017 34.2521560  
2 H 47.0412226 31.9781396 33.3592364  
3 H 47.9410352 30.5846010 33.9454851  
4 C 46.4801067 31.3878390 35.3192470  
5 N 46.5967153 30.5443655 36.4094653  
6 H 47.4084219 29.9663741 36.6565015  
7 C 45.4939810 30.6774750 37.1723154  
8 H 45.3392902 30.1653703 38.1190857  
9 N 44.6501627 31.5479613 36.6296809  
10 C 45.2546522 31.9988859 35.4730769  
11 H 44.7826538 32.7411494 34.8315897  
12 C 42.3493814 36.2166534 35.1484393  
13 H 42.5738509 36.8687507 36.0031639  
14 H 41.2914786 36.3648467 34.8703429  
15 C 42.5341813 34.7325263 35.5142682  
16 O 42.1629854 33.8657730 34.6828474  
17 O 43.0167375 34.4701269 36.6500064  
18 C 47.7993061 33.9032817 40.8734260  
19 H 47.5179881 33.2641235 41.7226192  
20 H 48.1256064 34.8772710 41.2706707

21 C 46.6392570 34.0569518 39.9622713  
22 N 46.4576089 35.1014242 39.0805460  
23 H 47.0722571 35.9178518 38.9597526  
24 C 45.3229186 34.8815447 38.3931859  
25 H 44.9240033 35.5436771 37.6304398  
26 N 44.7509320 33.7499278 38.7914174  
27 C 45.5639253 33.2271719 39.7727304  
28 H 45.3392903 32.2855534 40.2653811  
29 Fe 43.2580683 32.7229118 37.7463526  
30 O 41.4143960 31.6765057 39.7201987  
31 O 41.5063756 31.9586509 38.2975387  
32 C 41.6079227 34.4007329 40.5850261  
33 O 41.7146834 34.7976627 39.4969983  
34 O 41.5213099 34.0060983 41.6749379  
35 C 42.5107119 31.0914134 40.2231182  
36 O 43.5329706 30.9739497 39.5644557  
37 C 42.3046803 30.5923989 41.6338351  
38 C 41.4075579 29.3397803 41.7069210  
39 C 41.5078032 28.5904247 43.0765733  
40 O 41.6500574 29.3038841 44.0984654  
41 O 41.4317963 27.3437342 43.0240040  
42 H 40.3523702 29.6339061 41.5542157  
43 H 41.6677253 28.6132259 40.9183734  
44 H 43.3017896 30.3620777 42.0295375  
45 H 41.8747847 31.3896478 42.2586475  
46 N 43.5773876 28.0048422 31.3964241  
47 C 43.6903086 29.4938777 31.5683704  
48 C 44.8631548 30.0333294 30.7015490  
49 O 45.1223107 31.2396938 30.8525540  
50 C 43.7895595 29.9115563 33.0311367  
51 C 42.5656897 29.5667758 33.8893918  
52 C 41.2490333 30.1071156 33.3388914  
53 N 41.0910874 31.5390342 33.5012473  
54 C 40.0647310 32.2232390 32.9711019  
55 N 39.1241168 31.5762381 32.2409457  
56 N 39.9671267 33.5176365 33.2209941  
57 O 45.3970893 29.2165726 29.9041416  
58 H 42.7853274 29.9181399 31.1081995  
59 H 44.6940529 29.4695792 33.4818513  
60 H 43.9572041 30.9970506 33.0184033  
61 H 42.4574684 28.4718719 33.9778780  
62 H 42.7308019 29.9373898 34.9154927  
63 H 41.1770958 29.8564302 32.2690641  
64 H 40.4070576 29.5899360 33.8175977  
65 H 41.7246178 32.0942753 34.0931442  
66 H 39.2711569 30.6236537 31.8939132  
67 H 38.4740916 32.1386999 31.7033345  
68 H 40.7593115 33.9409842 33.7429890  
69 H 39.2364818 34.1109676 32.8152649  
70 H 44.2163381 27.5037327 32.0424684  
71 H 42.6067009 27.6363296 31.5055069  
72 H 43.9365042 27.7971260 30.4492532  
73 H 42.9875028 36.5165015 34.3171997  
74 H 48.6817797 33.4733597 40.3996385  
75 H 48.3719541 32.1705281 34.5345446

**BI-RC-0.010**

1 C 47.5111741 31.6453665 34.3410977

2 H 47.0234025 32.0871264 33.4605258  
3 H 47.9185598 30.6715264 34.0277095  
4 C 46.4968229 31.5021473 35.4359786  
5 N 46.6296373 30.6809864 36.5397943  
6 H 47.4449224 30.1039110 36.7818517  
7 C 45.5693532 30.8789927 37.3486395  
8 H 45.4410616 30.3922034 38.3123580  
9 N 44.7373152 31.7667347 36.8192573  
10 C 45.3025047 32.1635713 35.6241724  
11 H 44.8369757 32.9093569 34.9824423  
12 C 42.5224904 36.3176217 35.2154089  
13 H 42.7918946 36.9433800 36.0761698  
14 H 41.4493556 36.4810444 35.0092625  
15 C 42.6945071 34.8238568 35.5102824  
16 O 42.4877381 33.9962442 34.5991380  
17 O 43.0120940 34.4950463 36.7018823  
18 C 47.8158053 33.9031171 40.9204414  
19 H 47.5361310 33.2626317 41.7686683  
20 H 48.1476476 34.8741606 41.3198568  
21 C 46.6548305 34.0712230 40.0140828  
22 N 46.4778709 35.1282405 39.1456450  
23 H 47.1034536 35.9424528 39.0323505  
24 C 45.3476321 34.9285879 38.4556521  
25 H 44.9685512 35.6088541 37.6997469  
26 N 44.7613694 33.7929492 38.8407165  
27 C 45.5710120 33.2534882 39.8179107  
28 H 45.3466707 32.3179720 40.3202587  
29 Fe 43.1510585 32.8888664 37.8450322  
30 O 40.8695220 31.7993492 36.4298981  
31 O 41.9516931 31.3961225 37.0409995  
32 C 41.6910689 32.7950670 40.3462574  
33 O 41.7936470 33.3172801 39.1599600  
34 O 41.0383027 33.2019599 41.2797490  
35 C 42.5398715 31.4966460 40.4973794  
36 O 43.2515400 31.1886278 39.5383761  
37 C 42.4615601 30.7036955 41.7668399  
38 C 41.5461290 29.4581400 41.6862372  
39 C 41.5711946 28.6061019 43.0104542  
40 O 41.7091603 29.2472364 44.0736841  
41 O 41.4412855 27.3693960 42.8740399  
42 H 40.5009435 29.7739440 41.5080675  
43 H 41.8463082 28.7808721 40.8670363  
44 H 43.4827638 30.3735303 42.0080407  
45 H 42.0952287 31.3469707 42.5780777  
46 N 43.5089838 28.0558790 31.4670868  
47 C 43.6177167 29.5506267 31.6103975  
48 C 44.6832017 30.0591804 30.5916700  
49 O 44.9658684 31.2647556 30.6667605  
50 C 43.9161922 30.0007125 33.0355466  
51 C 42.8401335 29.7010837 34.0831084  
52 C 41.4410812 30.2233809 33.7537721  
53 N 41.4243095 31.6513725 33.4849843  
54 C 40.3515780 32.3035418 33.0061352  
55 N 39.3344032 31.6296616 32.4015695  
56 N 40.2835264 33.6126497 33.1557443  
57 O 45.1306276 29.2092218 29.7698337  
58 H 42.6566786 29.9639934 31.2673840  
59 H 44.8768904 29.5699359 33.3647502

60 H 44.0809769 31.0846565 32.9696915  
61 H 42.7496620 28.6124204 34.2544019  
62 H 43.1596212 30.1311555 35.0457001  
63 H 41.0377578 29.6812697 32.8848297  
64 H 40.7915921 30.0292089 34.6189718  
65 H 42.0094067 32.2488111 34.0904221  
66 H 39.4939868 30.6988826 32.0084384  
67 H 38.6796766 32.1983667 31.8755976  
68 H 41.0759854 34.0599053 33.6510437  
69 H 39.4969913 34.1697443 32.8065221  
70 H 44.1573759 27.5618622 32.1094117  
71 H 42.5446669 27.6783500 31.5757452  
72 H 43.8808050 27.8706469 30.5140998  
73 H 43.1215428 36.6314451 34.3605884  
74 H 48.6967418 33.4754932 40.4417390  
75 H 48.3727994 32.2563881 34.6100243

**BI-TS-0.010**

1 C 47.5072002 31.7194876 34.3555969  
2 H 47.0208880 32.1481711 33.4677284  
3 H 47.8740969 30.7206330 34.0724947  
4 C 46.5120718 31.6548656 35.4754799  
5 N 46.6306688 30.8398854 36.5872442  
6 H 47.4182043 30.2173991 36.8071961  
7 C 45.6216715 31.1221318 37.4329306  
8 H 45.4874193 30.6683036 38.4119560  
9 N 44.8338078 32.0630981 36.9209774  
10 C 45.3772482 32.4039488 35.6996192  
11 H 44.9370937 33.1724257 35.0686221  
12 C 42.5894225 36.4985344 35.3972891  
13 H 42.9160361 37.1903018 36.1852082  
14 H 41.5122507 36.6651996 35.2225534  
15 C 42.7622922 35.0304634 35.8079122  
16 O 42.3522654 34.1418911 35.0174393  
17 O 43.2824392 34.7717508 36.9311274  
18 C 48.1188142 33.9870956 41.0289657  
19 H 47.8419803 33.3116326 41.8500372  
20 H 48.5423260 34.9027949 41.4677557  
21 C 46.9197534 34.2887053 40.2172254  
22 N 46.7671210 35.3819335 39.3866861  
23 H 47.4353818 36.1519248 39.2396306  
24 C 45.6002206 35.2844021 38.7476020  
25 H 45.2273758 36.0116090 38.0328302  
26 N 44.9673155 34.1753752 39.1390336  
27 C 45.7759674 33.5557987 40.0699481  
28 H 45.4846468 32.6334815 40.5599713  
29 Fe 43.4973960 33.1790719 38.1948412  
30 O 41.6735196 30.7113364 38.9221104  
31 O 41.9889347 31.1495255 37.7125819  
32 C 41.5778997 32.7831097 40.1560437  
33 O 41.8000557 33.5282635 39.1105158  
34 O 40.8976559 33.0272151 41.1205476  
35 C 42.4258335 31.4313886 40.0388135  
36 O 43.6192392 31.7545138 39.5676631  
37 C 42.4193589 30.5378430 41.2936052  
38 C 41.3649088 29.4308640 41.4607911  
39 C 41.5066320 28.6137444 42.8001203  
40 O 41.7564655 29.2677312 43.8362474

41 O 41.3396281 27.3718787 42.7156471  
42 H 40.3551140 29.8867451 41.4604126  
43 H 41.4199875 28.6915059 40.6426293  
44 H 43.4266496 30.1034289 41.3289592  
45 H 42.3346838 31.2131812 42.1575203  
46 N 43.4664625 28.1265571 31.6315294  
47 C 43.5463795 29.6224565 31.7802716  
48 C 44.5728895 30.1375522 30.7173172  
49 O 44.8299550 31.3502632 30.7546746  
50 C 43.9201141 30.0947190 33.1828972  
51 C 42.9435107 29.8065843 34.3272992  
52 C 41.5197945 30.3565329 34.1778815  
53 N 41.4728606 31.7768650 33.8674117  
54 C 40.4327913 32.4076069 33.2889839  
55 N 39.4539087 31.7143087 32.6409255  
56 N 40.3508655 33.7197806 33.3876735  
57 O 45.0250463 29.2750567 29.9125110  
58 H 42.5632103 30.0175753 31.4796080  
59 H 44.9091039 29.6837581 33.4491178  
60 H 44.0662948 31.1796719 33.0895787  
61 H 42.8517225 28.7191289 34.5066339  
62 H 43.3805493 30.2221204 35.2496951  
63 H 40.9778436 29.7963768 33.4015989  
64 H 41.0097992 30.1845563 35.1419058  
65 H 42.0440173 32.4092509 34.4539834  
66 H 39.6592821 30.7994216 32.2288271  
67 H 38.8336149 32.2860074 32.0770333  
68 H 41.0794655 34.1874443 33.9709068  
69 H 39.5729352 34.2427961 32.9725043  
70 H 44.1187992 27.6329130 32.2699925  
71 H 42.5105427 27.7238935 31.7125831  
72 H 43.8617121 27.9696447 30.6784190  
73 H 43.1505937 36.7288459 34.4916895  
74 H 48.9323306 33.5306560 40.4651208  
75 H 48.3919494 32.3097133 34.5941755

**BI-IM-0.010**

1 C 47.6222439 31.6862321 34.2201010  
2 H 47.1625466 32.1371767 33.3287595  
3 H 48.0438871 30.7182618 33.9072010  
4 C 46.5716163 31.5244189 35.2769807  
5 N 46.6733853 30.6920548 36.3775279  
6 H 47.4834505 30.1191066 36.6450288  
7 C 45.5782194 30.8614493 37.1439738  
8 H 45.4114196 30.3671149 38.0986477  
9 N 44.7517920 31.7446574 36.5916870  
10 C 45.3632213 32.1681382 35.4283846  
11 H 44.9137491 32.9249698 34.7873353  
12 C 42.4939816 36.4072200 35.1326985  
13 H 42.7418855 37.0772530 35.9667328  
14 H 41.4259515 36.5534840 34.8897332  
15 C 42.6774170 34.9345457 35.5178874  
16 O 42.4008236 34.0564031 34.6477362  
17 O 43.0420741 34.6719746 36.6887114  
18 C 47.8584314 33.9039058 40.9294275  
19 H 47.5763997 33.2501626 41.7669557  
20 H 48.2058270 34.8624199 41.3446390  
21 C 46.6958008 34.1068851 40.0325854

|       |            |            |            |
|-------|------------|------------|------------|
| 22 N  | 46.5119678 | 35.2068479 | 39.2222278 |
| 23 H  | 47.1345758 | 36.0259625 | 39.1425693 |
| 24 C  | 45.3823905 | 35.0371324 | 38.5201568 |
| 25 H  | 44.9900353 | 35.7603755 | 37.8112892 |
| 26 N  | 44.8075286 | 33.8775877 | 38.8409143 |
| 27 C  | 45.6200874 | 33.2906885 | 39.7897733 |
| 28 H  | 45.3969945 | 32.3206867 | 40.2260329 |
| 29 Fe | 43.3675386 | 32.9189067 | 37.7317028 |
| 30 O  | 41.6617185 | 31.6131966 | 39.6439918 |
| 31 O  | 41.8310852 | 31.7635839 | 38.2080262 |
| 32 C  | 41.5092123 | 34.2593907 | 40.4688297 |
| 33 O  | 41.6749287 | 34.5765593 | 39.3595425 |
| 34 O  | 41.3440420 | 33.9445303 | 41.5730286 |
| 35 C  | 42.6687184 | 30.9314312 | 40.2449901 |
| 36 O  | 43.6965000 | 30.6433609 | 39.6699817 |
| 37 C  | 42.2969841 | 30.5351663 | 41.6563535 |
| 38 C  | 41.4223882 | 29.2617066 | 41.6716013 |
| 39 C  | 41.4599874 | 28.4880422 | 43.0317810 |
| 40 O  | 41.6119750 | 29.1777688 | 44.0638393 |
| 41 O  | 41.3287903 | 27.2450153 | 42.9587332 |
| 42 H  | 40.3698608 | 29.5315147 | 41.4599343 |
| 43 H  | 41.7412439 | 28.5451247 | 40.8938446 |
| 44 H  | 43.2357596 | 30.3446933 | 42.1914058 |
| 45 H  | 41.7807991 | 31.3564157 | 42.1734165 |
| 46 N  | 43.4810966 | 28.0853900 | 31.5058926 |
| 47 C  | 43.5585951 | 29.5839795 | 31.6311937 |
| 48 C  | 44.5948785 | 30.0955911 | 30.5809771 |
| 49 O  | 44.8411098 | 31.3105401 | 30.6135270 |
| 50 C  | 43.8962709 | 30.0666629 | 33.0373515 |
| 51 C  | 42.8762563 | 29.7745952 | 34.1411332 |
| 52 C  | 41.4577710 | 30.2948689 | 33.8942324 |
| 53 N  | 41.4043454 | 31.7190287 | 33.6219203 |
| 54 C  | 40.3470908 | 32.3545108 | 33.0828797 |
| 55 N  | 39.3382722 | 31.6584238 | 32.4826319 |
| 56 N  | 40.2824039 | 33.6664426 | 33.1836427 |
| 57 O  | 45.0643690 | 29.2317951 | 29.7868277 |
| 58 H  | 42.5804054 | 29.9725661 | 31.3077857 |
| 59 H  | 44.8767553 | 29.6616148 | 33.3387651 |
| 60 H  | 44.0414851 | 31.1513107 | 32.9453003 |
| 61 H  | 42.7943718 | 28.6874973 | 34.3263358 |
| 62 H  | 43.2605900 | 30.2098942 | 35.0777457 |
| 63 H  | 40.9995202 | 29.7424130 | 33.0600885 |
| 64 H  | 40.8646937 | 30.0751985 | 34.7980384 |
| 65 H  | 42.0109208 | 32.3537740 | 34.1763427 |
| 66 H  | 39.5232167 | 30.7326566 | 32.0858222 |
| 67 H  | 38.7055769 | 32.2200753 | 31.9225263 |
| 68 H  | 41.0763140 | 34.1217754 | 33.6943116 |
| 69 H  | 39.5069268 | 34.2111734 | 32.7924309 |
| 70 H  | 44.1315022 | 27.6057511 | 32.1572869 |
| 71 H  | 42.5233010 | 27.6892894 | 31.6001639 |
| 72 H  | 43.8731475 | 27.9045744 | 30.5579862 |
| 73 H  | 43.1081773 | 36.6822950 | 34.2752811 |
| 74 H  | 48.7295959 | 33.4756779 | 40.4336851 |
| 75 H  | 48.4692651 | 32.2985468 | 34.5294438 |
